# Supplementary material for: Distinct Roles for Matrix Metalloproteinases 2 and 9 in Embryonic Hematopoietic Stem Cell Emergence, Migration, and Niche Colonization
Source: PubMed Central journal article supplement — Stem Cell Reports. 2017 Apr 13;8(5):1226–41. doi: 10.1016/j.stemcr.2017.03.016 (PMC5425629; doi:10.1016/j.stemcr.2017.03.016), 2017-04-13
Supplement: mmc1.pdf [file mmc1.pdf]

**Stem Cell Reports, Volume 8**

**Supplemental Information**

**Distinct Roles for Matrix Metalloproteinases 2 and 9 in Embryonic Hematopoietic Stem Cell Emergence, Migration, and Niche Colonization**

**Lindsay N. Theodore, Elliott J. Hagedorn, Mauricio Cortes, Kelsey Natsuhara, Sarah Y. Liu, Julie R. Perlin, Song Yang, Madeleine L. Daily, Leonard I. Zon, and Trista E. North**

## SUPPLEMENTAL FIGURE LEGENDS

### **Figure S1. Mmp2 and Mmp9 are expressed in discrete populations within hemogenic regions.**

*Related to Figure 1.*

- A) Exposure to dimethyl-Prostaglandin-E2 (PGE2) (10 $\mu$ M) and CAY10397 (CAY) (10 $\mu$ M), a small molecule that stabilizes endogenous PGE2, increased *runx1* and *cmyb* expression in the ventral dorsal aorta (VDA) by WISH, while the cyclooxygenase antagonist Indomethacin (Indo, 10 $\mu$ M) decreased expression of HSPC markers at 36 hours post fertilization (hpf).
- B) Qualitative phenotypic distribution of embryos from S1A scored with high/medium/low *runx1/cmyb* expression in the AGM (n $\geq$ 20 embryos/condition).
- C) qPCR analysis using FACS-sorted cell populations from *Tg(kdrl:dsred;cmyb:gfp)* embryos at 36 hpf showed enrichment of *mmp2* in the Flk1<sup>+</sup>cMyb<sup>-</sup> vasculature, while *mmp9* expression was present in all populations examined (1000 embryos x 2 replicate sorts). Error bars: mean  $\pm$  SD.
- D) RNA-seq analysis (~1000 pooled *Tg(mpeg1:mcherry;mpx:egfp)* embryos, >50,000 cells/fraction) indicated that *mmp9* expression is concentrated in FACS-sorted Mpx<sup>+</sup> neutrophils at 72 hpf.
- E) Metronidazole (Mtz)-mediated (24-48 hpf) targeted ablation of primitive myeloid cell types in *Tg(mpeg1:gal4;uas:nfsb-mcherry)* (macrophage) or *Tg(mpx:gal4;uas:nfsb-mcherry)* (neutrophil) embryos confirmed that neutrophil loss strongly diminished *mmp9* expression in the trunk and tail, while macrophage loss had minimal impact.
- F) Qualitative phenotypic distribution of embryos from S1E scored with high/medium/low *mmp9* expression in the trunk and tail region (n $\geq$ 25 embryos/condition).

Scale bars: 100 $\mu$ m.

### **Figure S2. The pan-gelatinase inhibitor SB-3CT is toxic during early hematopoiesis, but ARP-mediated Mmp2 inhibition has no effect on arterial identity or cell death. Related to Figure 2.**

- A) Exposure to 10 $\mu$ M SB-3CT (pan-MMP2/9 inhibitor) during HSPC formation (12-36 hpf) decreased *runx1/cmyb* expression, while 1 $\mu$ M SB-3CT had no effect by WISH analysis.
- B) Qualitative phenotypic distribution of embryos scored with high/medium/low *runx1/cmyb* expression in the AGM at 36 hpf (n $\geq$ 20 embryos/condition).
- C) High dose SB-3CT (10 $\mu$ M) treatment (as in S2A) caused major vascular defects and deformities in *Tg(kdrl:gfp)* embryos, suggestive of overall toxicity.
- D) Qualitative phenotypic distribution of embryos scored with normal/mild defect/major defect in Flk1:GFP expression (n $\geq$ 20 embryos/condition).
- E) Exposure to high dose SB-3CT (10 $\mu$ M) at a later time point (38-60 hpf), post-HSPC specification and EHT onset, diminished *cmyb* expression in the CHT and caused sustained appearance in the AGM, while low dose (1 $\mu$ M) had less prominent impact by WISH analysis.
- F) Qualitative phenotypic distribution of embryos scored with high/medium/low *cmyb* expression in the CHT at 60 hpf (n-value as in 2B).
- G) Delayed onset of treatment with SB-3CT (as in S2E) led to minor vascular defects (abnormal vascular branching) in *Tg(kdrl:gfp)* embryos, suggesting embryos better tolerate exposure at later time points.
- H) Qualitative phenotypic distribution of embryos scored with normal/mild defect/major defect in Flk1:GFP expression (n-value as in 2D).
- I) Exposure to Prinomastat (20 $\mu$ M), ARP-101 (ARP, 10 $\mu$ M), or MMP9-I (5 $\mu$ M) during HSPC formation (12-36 hpf) had no effect on *ephrinB2* expression in the AGM at 36 hpf by WISH analysis (n $\geq$ 10/condition).
- J) Exposure to ARP does not alter the appearance of Acridine Orange (AO) positive (apoptotic) cells in the AGM at 36 hpf compared to controls.
- K) Quantification of the number of AO<sup>+</sup> cells in the AGM region in control and ARP treated embryos (DMSO: 3.64  $\pm$  2.90; ARP: 3.25  $\pm$  2.59; p=0.61, 2-tailed t-test; n $\geq$ 20 embryos/condition).

Scale bars: 100 $\mu$ m.

**Figure S3. Validation of the *Tg(runx1+23<sup>(144-378)</sup>:egfp)* HSPC reporter transgenic zebrafish line and characterization of the effect of *Mmp2* inhibition on cell proliferation. Related to Figure 3.**

- A) Genomic DNA sequence corresponding to the murine +23 Runx1 enhancer (black) and the internal 144-378 base pair fragment (*Runx1+23<sup>(144-378)</sup>*, red).
- B) Schematic representation of the *Runx1+144:GFP* DNA construct used to create the *Tg(runx1+23<sup>(144-378)</sup>:eGFP)* line; a *Tg(runx1+23:egfp)* transgenic reporter genetically similar to the recently published *Tg(runx:egfp)* line (Tamplin et al., 2015) was also created using the full murine enhancer sequence.
- C) Representative fluorescence pattern *Cd41:GFP<sup>+</sup>*, *Runx1+23:GFP<sup>+</sup>* and *Runx1+144:GFP<sup>+</sup>* cells in the AGM of transgenic embryos at 36 hpf after treatment with dmpGE2 (10 $\mu$ M; 12-36 hpf) compared to DMSO controls, measured with the same length of exposure time.
- D) Representative images of *Runx1+144:GFP* expression in the CHT (*top*) and thymus (*bottom*) at 84 hpf.
- E) Exposure to ARP-101 (ARP, 10 $\mu$ M) from 12-24 hpf does not impact the appearance of proliferating cells in the AGM of *Tg(EF1:mAG-zGEM(1/100); kdrl:dsred)* embryos compared to controls at 24 hpf.
- F) Quantification of the number of mAG-zGEM (*G2/M*)<sup>+</sup> cells in the AGM of embryos from S3E (DMSO: 34.0  $\pm$  18.6; MMP9-I: 32.8  $\pm$  9.64, p=0.865, 2-tailed t-test, n $\geq$ 7 embryos/condition). Error bars: mean  $\pm$  SD.

Scale bars: 100 $\mu$ m.

**Figure S4. *Mmp2* inhibition causes an accumulation of fibronectin in the AGM. Related to Figure 4.**

- A) Exposure to SB-3CT (10 $\mu$ M, 32-48 hpf) increased fibronectin staining in the AGM compared to controls at 48 hpf (n $\geq$ 10 embryos/condition).
- B) Vibratome cross-sections show increased fibronectin staining in the posterior cardinal vein (PCV) and ventral wall of the dorsal aorta (DA) with SB-3CT treatment (32-54 hpf) compared to controls; inset

magnifications of boxed regions (from *left panels*) show gray-scale fluorescence of fibronectin (*right*;  $n \geq 7$  embryos/condition).

Scale bars: 30 (A) and 15 $\mu$ m (B).

**Figure S5. Mmp2 inhibition delays HSPC migration to the CHT without impacting circulation.**

Related to Figure 5.

- A) *mmp2* mutants display inappropriate *cmyb* expression in the AGM at 72 hpf, phenocopying the effect of ARP- and MO-mediated Mmp2 inhibition.
- B) Qualitative phenotypic distribution of total embryos from S5A (*mmp2*<sup>+/-</sup> incross) scored with normal versus abnormal *cmyb* expression in the AGM at 72 hpf ( $n \geq 20$  embryos/condition).
- C) Embryos exposed to ARP (10 $\mu$ M, 12-48 hpf) showed reduced *cmyb* expression in the CHT, concurrent with enhanced expression in the AGM at 48 hpf, suggesting HSPCs are restrained in colonization of secondary hematopoietic sites with loss of Mmp2 function.
- D) Qualitative phenotypic distribution of embryos from S5C scored with normal versus abnormal *cmyb* expression at 48 hpf ( $n \geq 20$  embryos/condition).
- E) *In vivo* imaging of *Tg(kdrl:gfp/gata1a:dsred)* embryos after exposure (12-72 hpf) to ARP, MMP9-I or Prinomastat showed no differences in Gata1<sup>+</sup> erythrocyte circulation through the Flk1<sup>+</sup> CHT vasculature compared to controls at 72 hpf ( $n \geq 10$  embryos/condition).

Scale bars: 100 $\mu$ m.

**Figure S6. Mmp9 inhibition impacts HSPC localization and number in the CHT, independent of alterations in cell proliferation.** Related to Figure 6.

- A) *In vivo* imaging of *Tg(-6.0itga2b:egfp)* embryos showed MMP9-I treatment (5 $\mu$ M, 12-72 hpf) increased the appearance of Cd41<sup>+</sup> HSPCs in the CHT region, including preferential accumulation in the anterior (*blue bar*) versus posterior (*orange bar*) half of the hematopoietic niche.

- B) Quantification of the phenotype shown in S6A via manual counts of the number of Cd41:GFP<sup>+</sup> cells per entire CHT region (DMSO: 43.5 ±1.73; MMP9-I: 64.75 ±7.93, \*p<0.05, 2-tailed t-test, n≥4 embryos/condition). Error bars: mean ± SD.
- C) FACS for Cd41:GFP<sup>+</sup>,Gata1:dsRed<sup>-</sup> cells (with negative thrombocyte selection) showed no difference in whole embryo HSPC numbers at 72 hpf with MMP9-I exposure (12-72 hpf) compared to control (DMSO: 0.83 ±0.077; MMP9-I: 0.781 ±0.028, p=0.328, 2-tailed t-test, n≥5 embryos/sample, >3 replicates/condition). Error bars: mean ± SD.
- D) Quantification of the localization phenotype observed in S6A via manual count Cd41:GFP<sup>+</sup> HSPCs in each half of the CHT at 72 hpf revealed an increase in the anterior: posterior cell number ratio with Mmp9 (12-72 hpf) inhibition (DMSO: 0.62 ±0.132; MMP9-I: 1.16 ±0.317, \*p<0.05, 2-tailed t-test, n-value as in S6B). Error bars: mean ± SD.
- E) EdU labeling in *Tg(runx1+23<sup>(144-235)</sup>:egfp)* embryos showed no change in the level of double positive EdU/Runx1+144 staining in the CHT after MMP9-I treatment (24-72 hpf).
- F) Qualitative phenotypic distribution of total embryos from S6E scored with high, medium, or low EdU staining level at 72 hpf (n≥20 embryos/condition).
- G) pH3 staining in *Tg(runx1+23<sup>(144-235)</sup>:egfp)* embryos showed no alteration in the number of double positive pH3/Runx1+144 cells in the CHT after MMP9-I treatment (24-72 hpf).
- H) Quantification of the phenotype in S6G via manual counts of the number of pH3<sup>+</sup>/Runx1+144:GFP<sup>+</sup> HSPCs per CHT in control and MMP9-I treated embryos (DMSO: 2.58 ±1.42; MMP9-I: 1.91 ±1.56; p=0.13, 2-tailed t-test; n≥20 embryos/condition). Error bars: mean ± SD.

Scale bars: 100µm.

**Figure S7. Mmp9 inhibition does not impact HSPC localization in *cxcl12a* heterozygous mutants.**

Related to Figure 7.

- A) Exposure of wild-type (WT) sibling controls to MMP9-I (5µM, 12-72 hpf) increased *cmyb* expression in the CHT at 72 hpf; in contrast, while heterozygous loss of *cxcl12a* in *cxcl12a<sup>t30516/t30516</sup>* (*cxcl12a<sup>+/-</sup>*)

embryos had no impact on *cmyb* expression alone, it antagonized the effect of Mmp9 inhibition (n≥20/condition).

- B) Qualitative phenotypic distribution of control and MMP9-I treated WT and *cxcl12a*<sup>+/-</sup> siblings from S7A scored with high/medium/low *cmyb* expression at 72 hpf (n≥20/condition).

Scale bars: 100μm.

Supplemental Figure 1

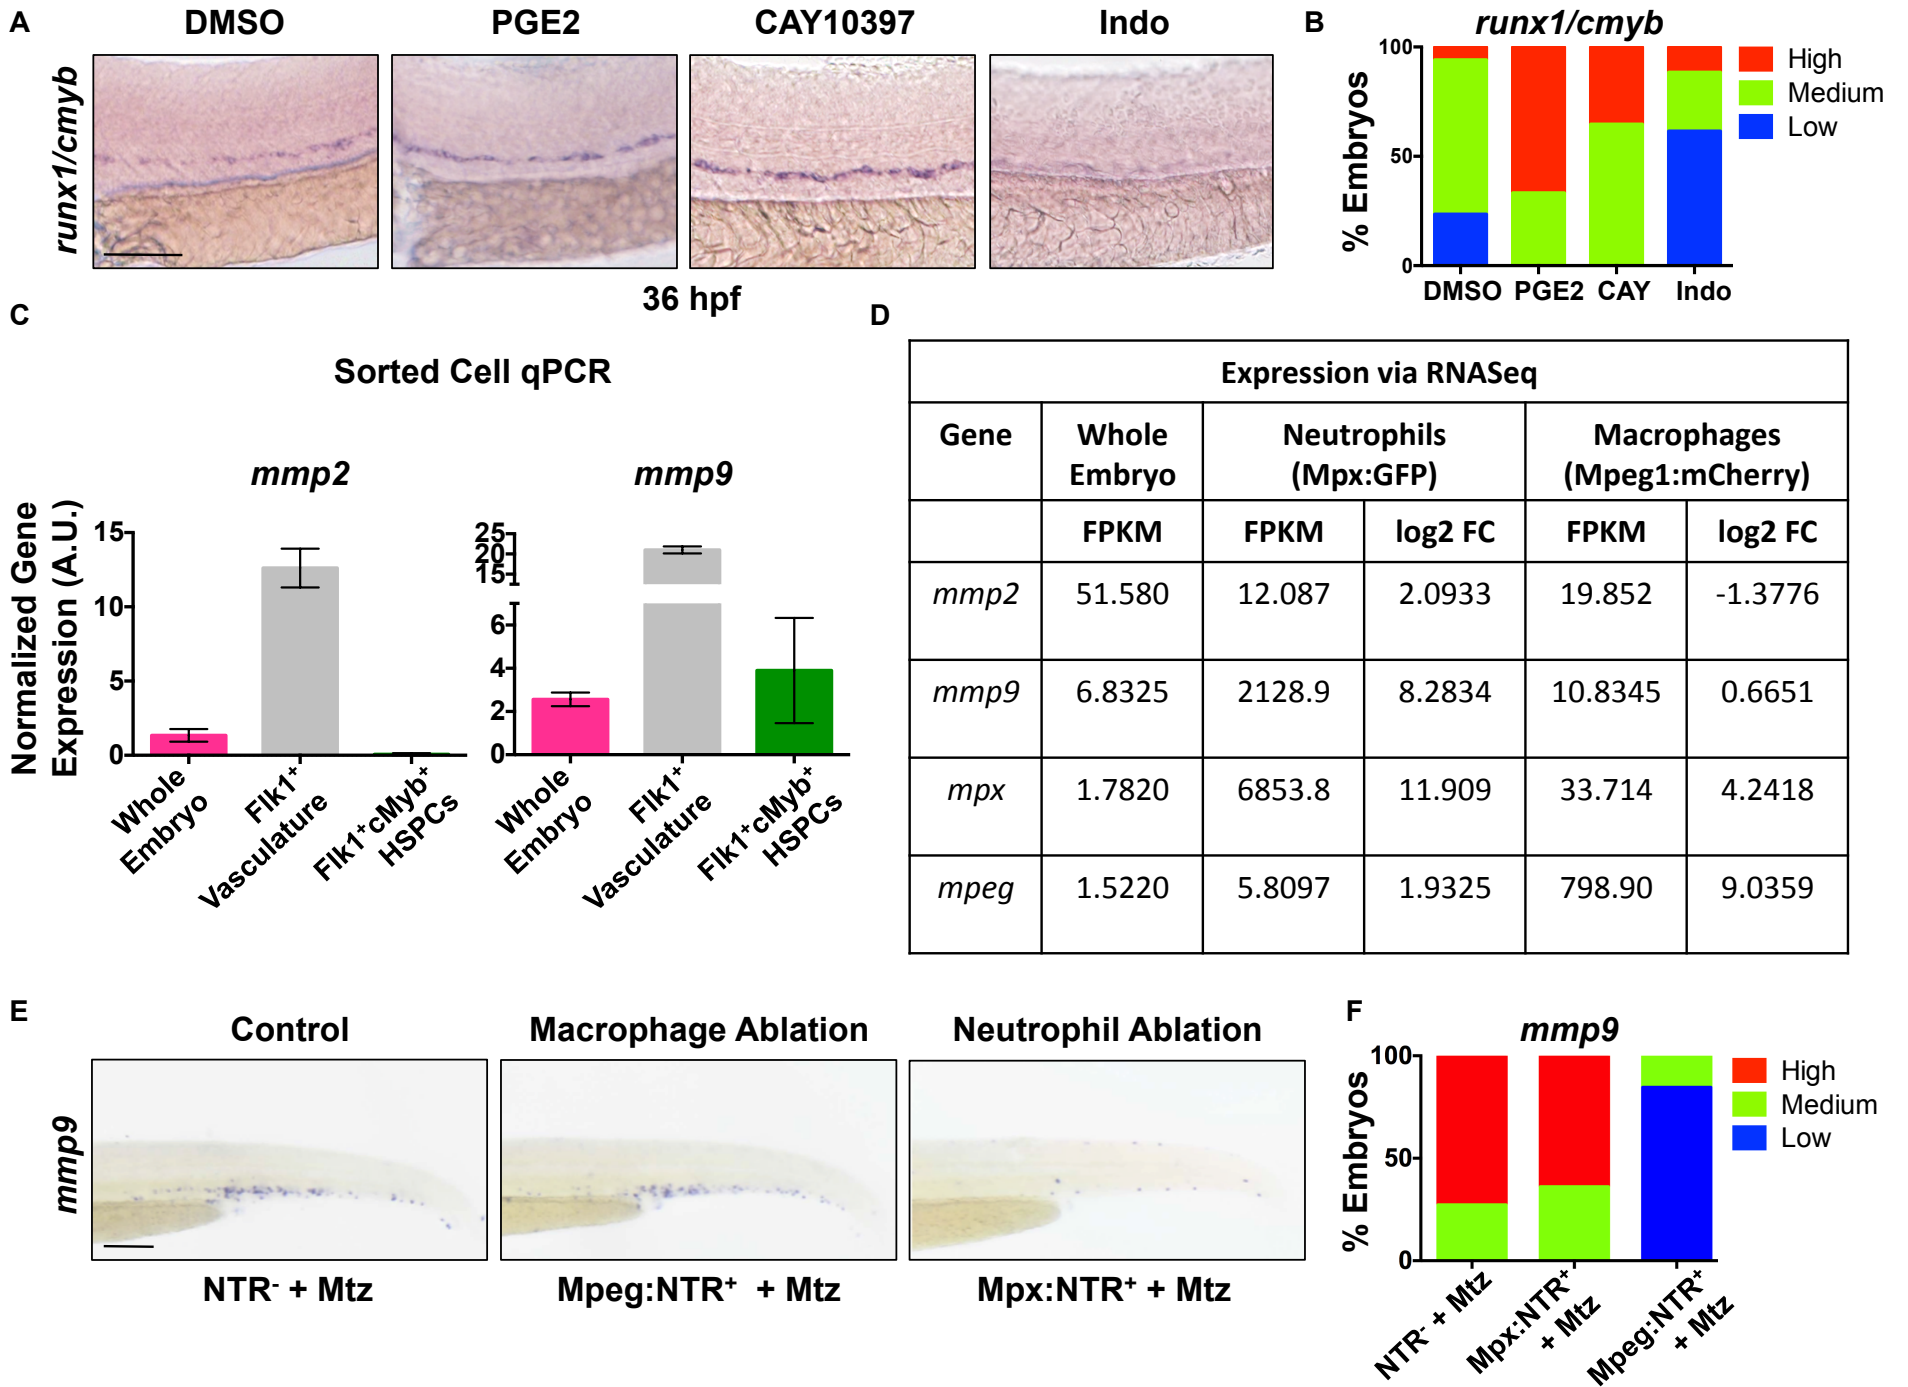



Supplemental Figure 2

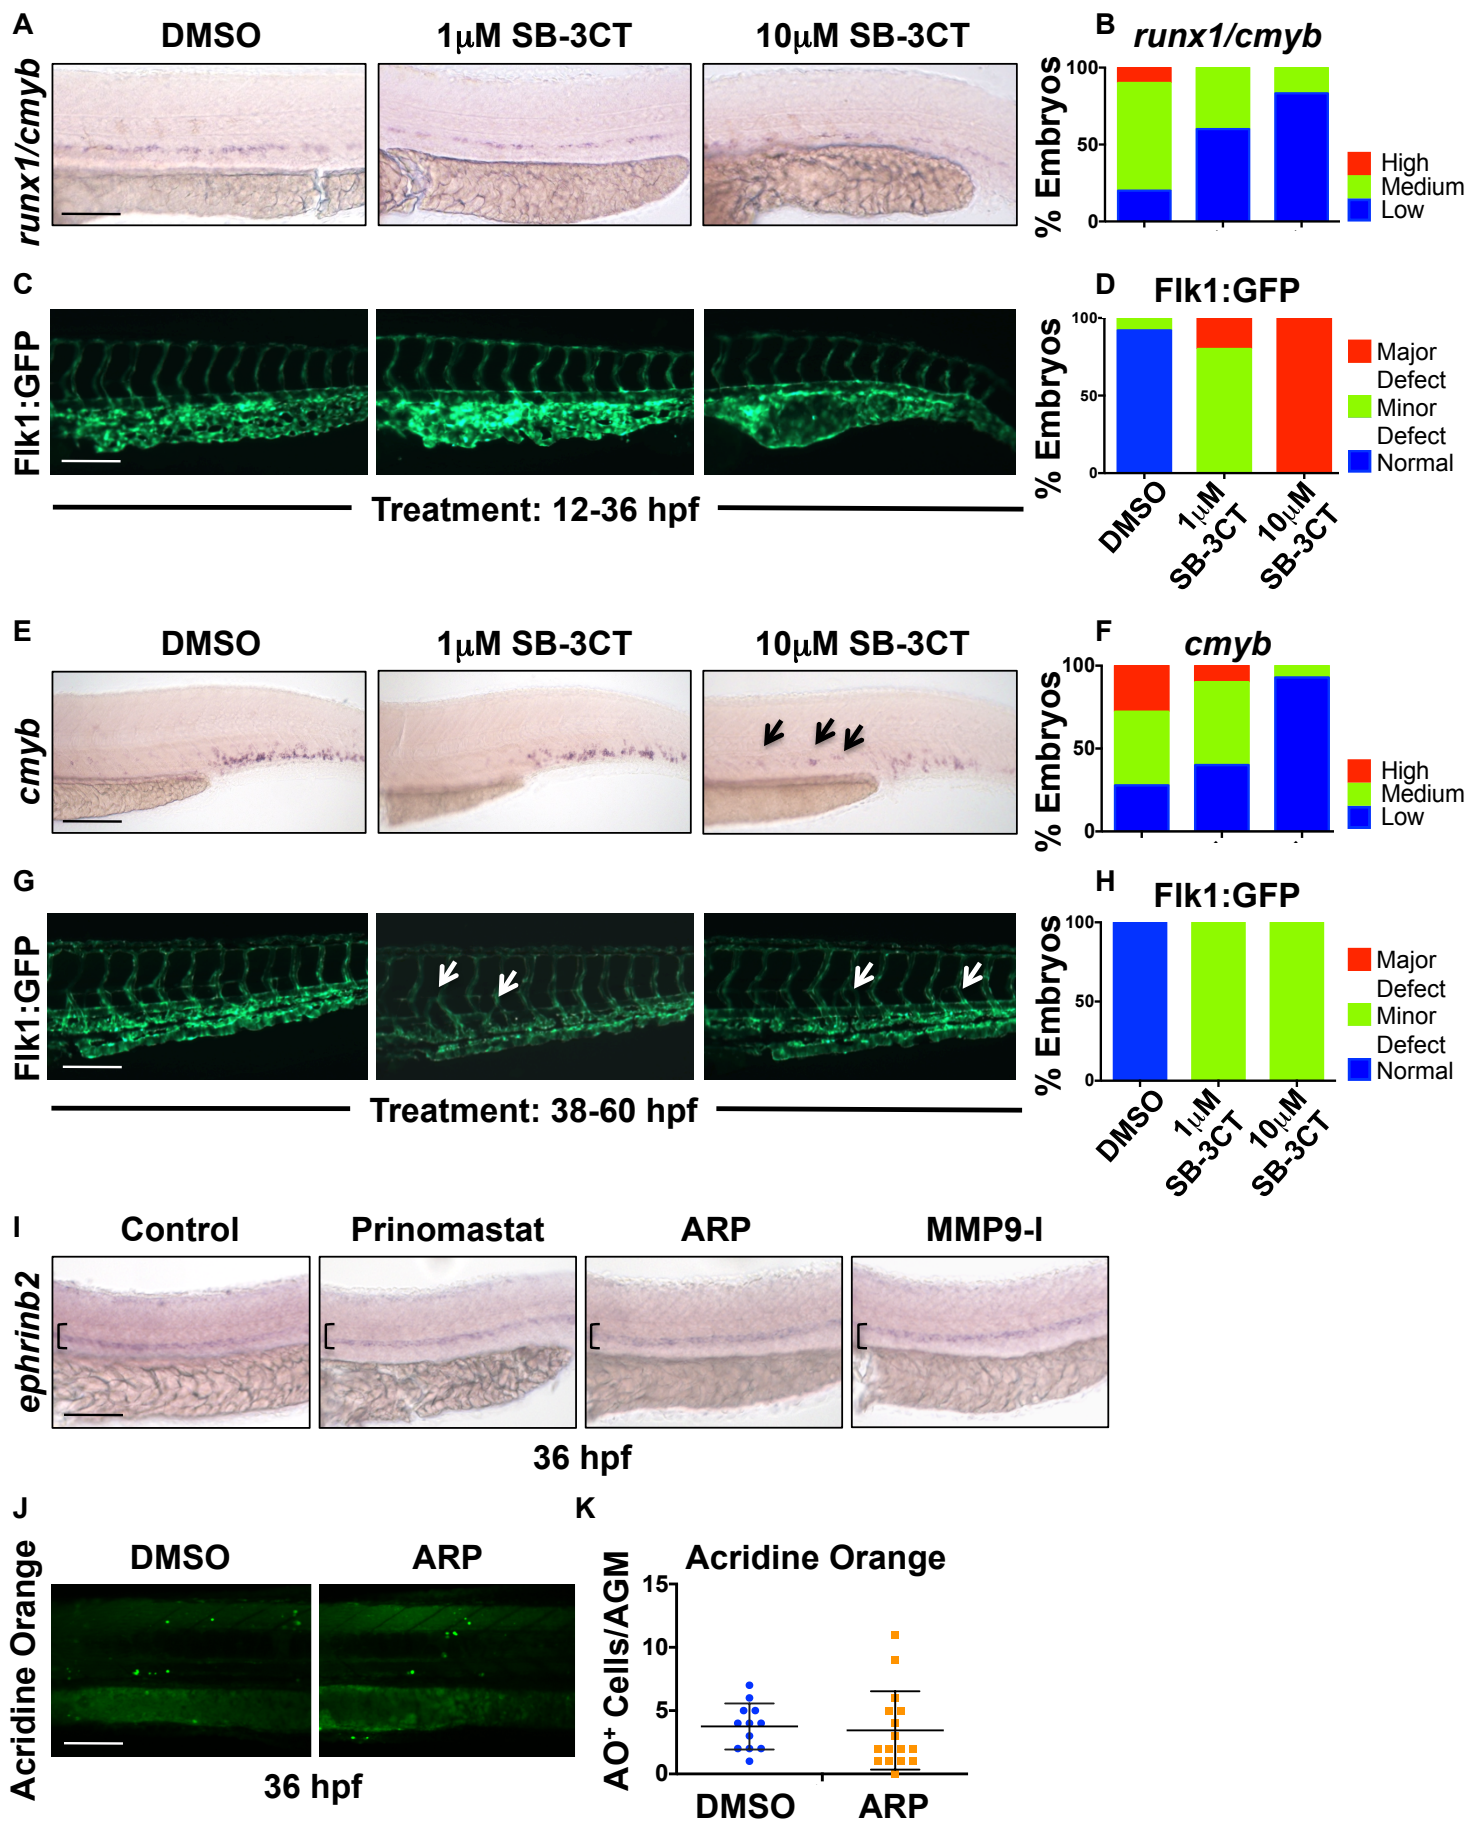

### Supplemental Figure 3

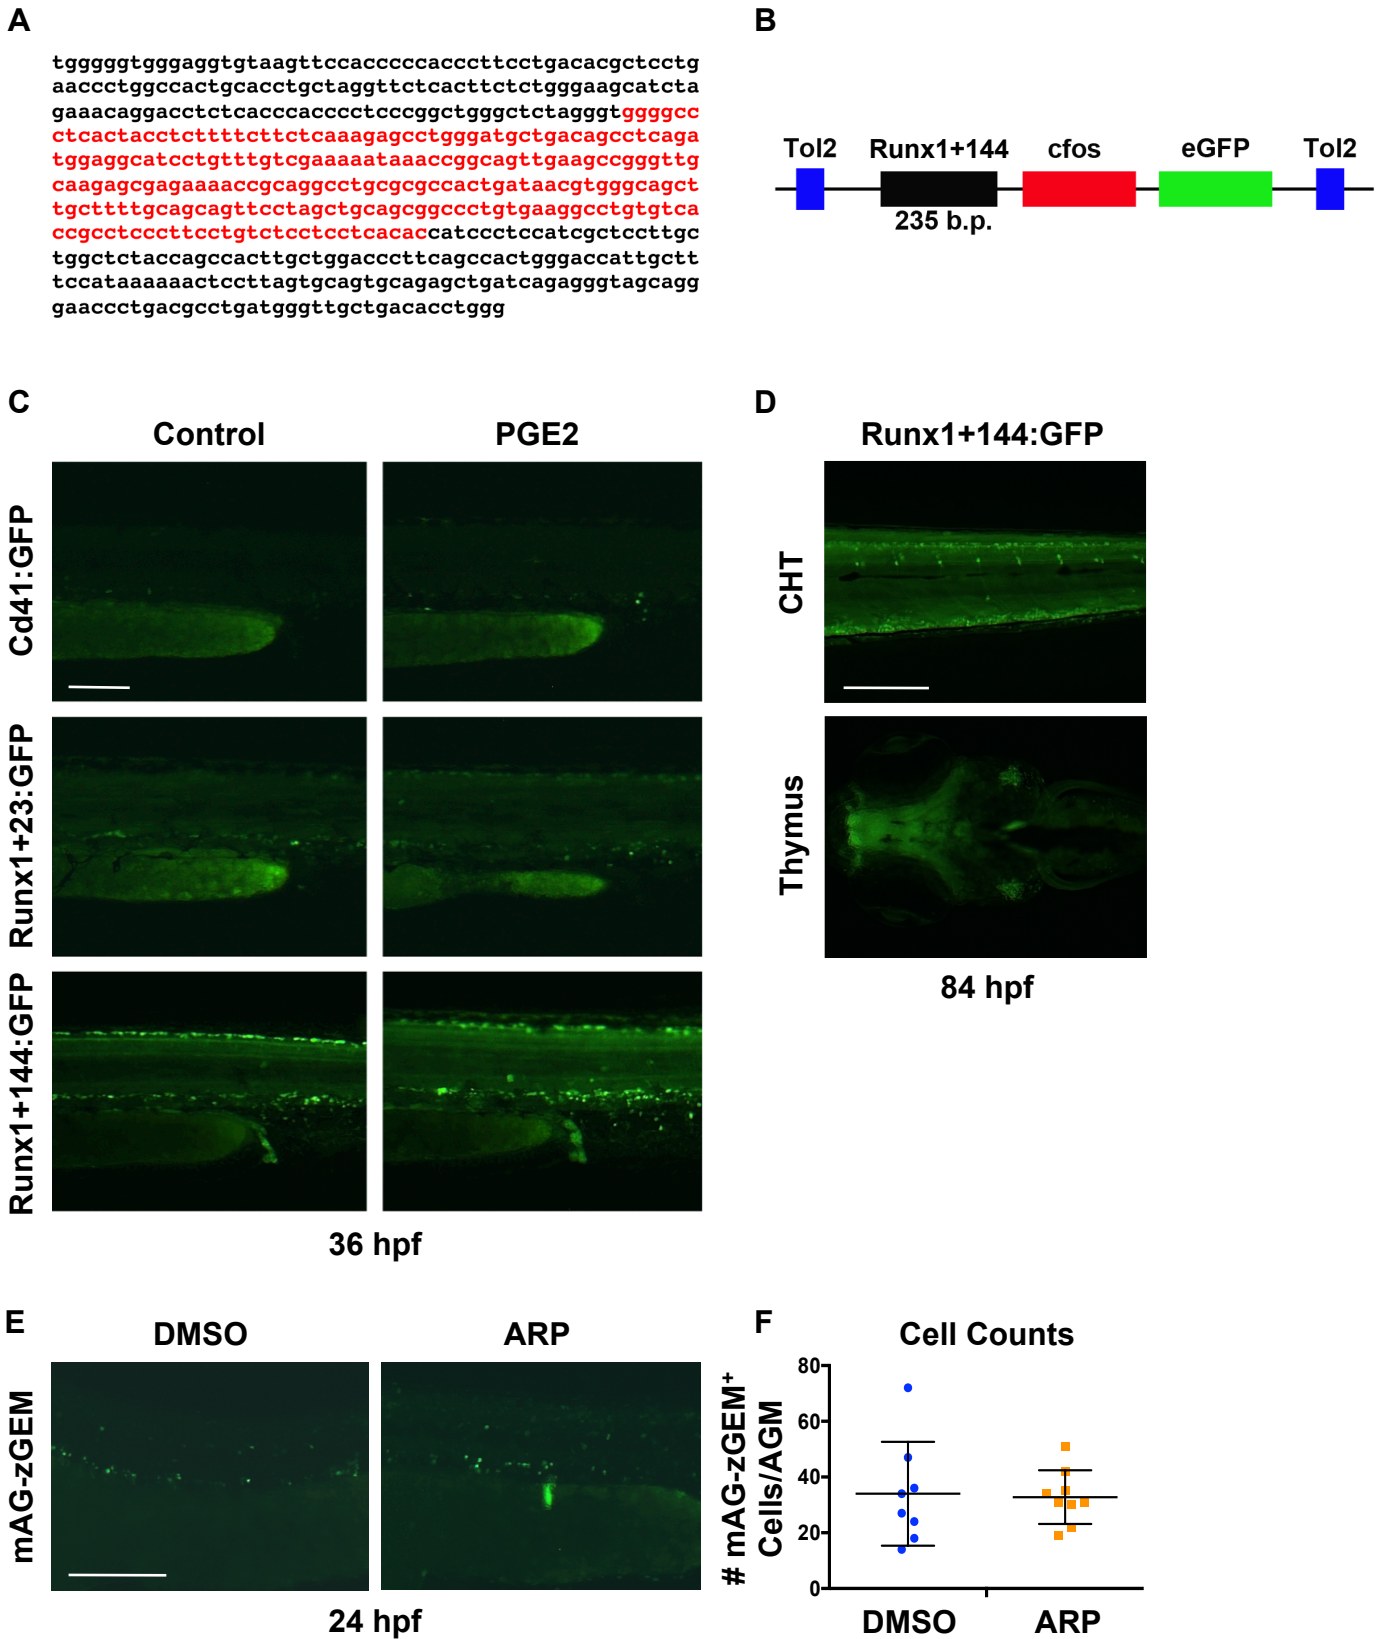

Supplemental Figure 4

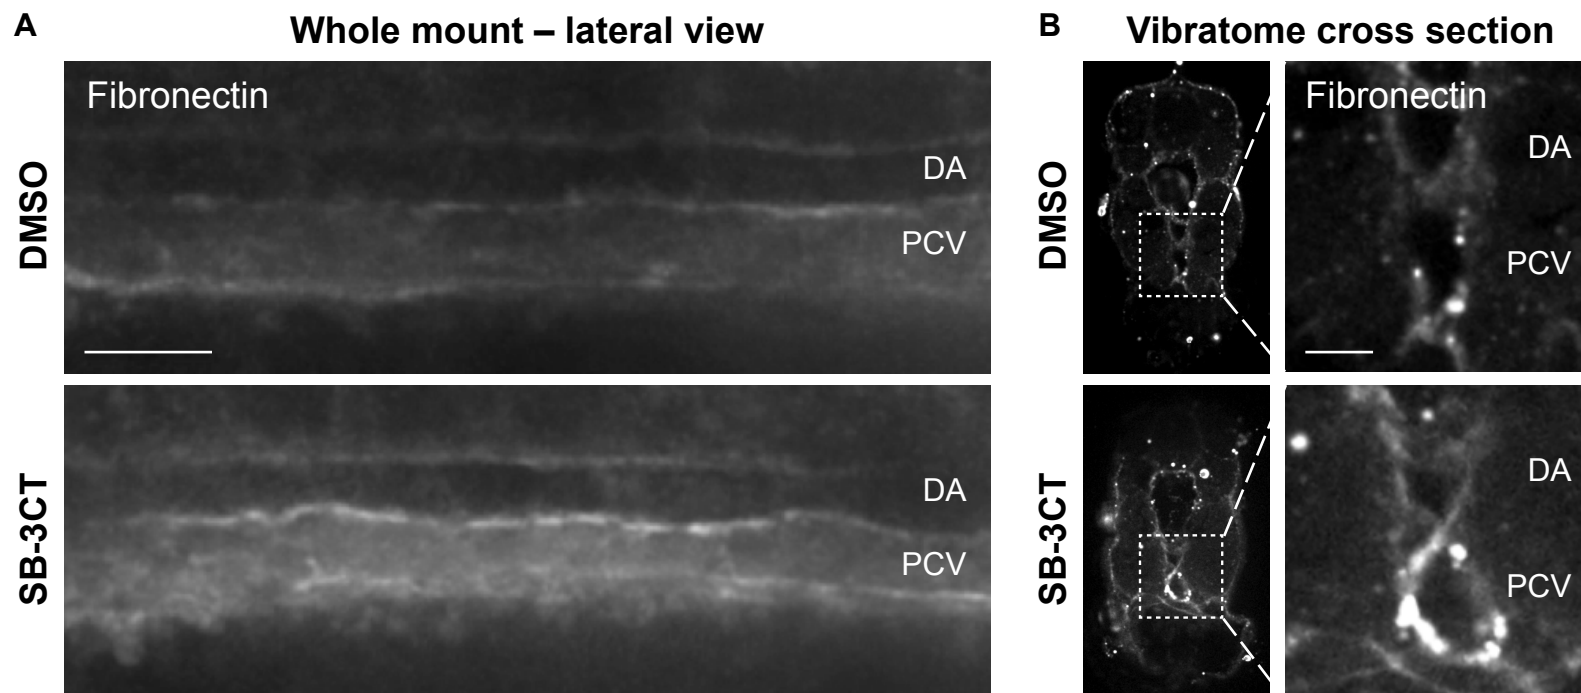

Supplemental Figure 5

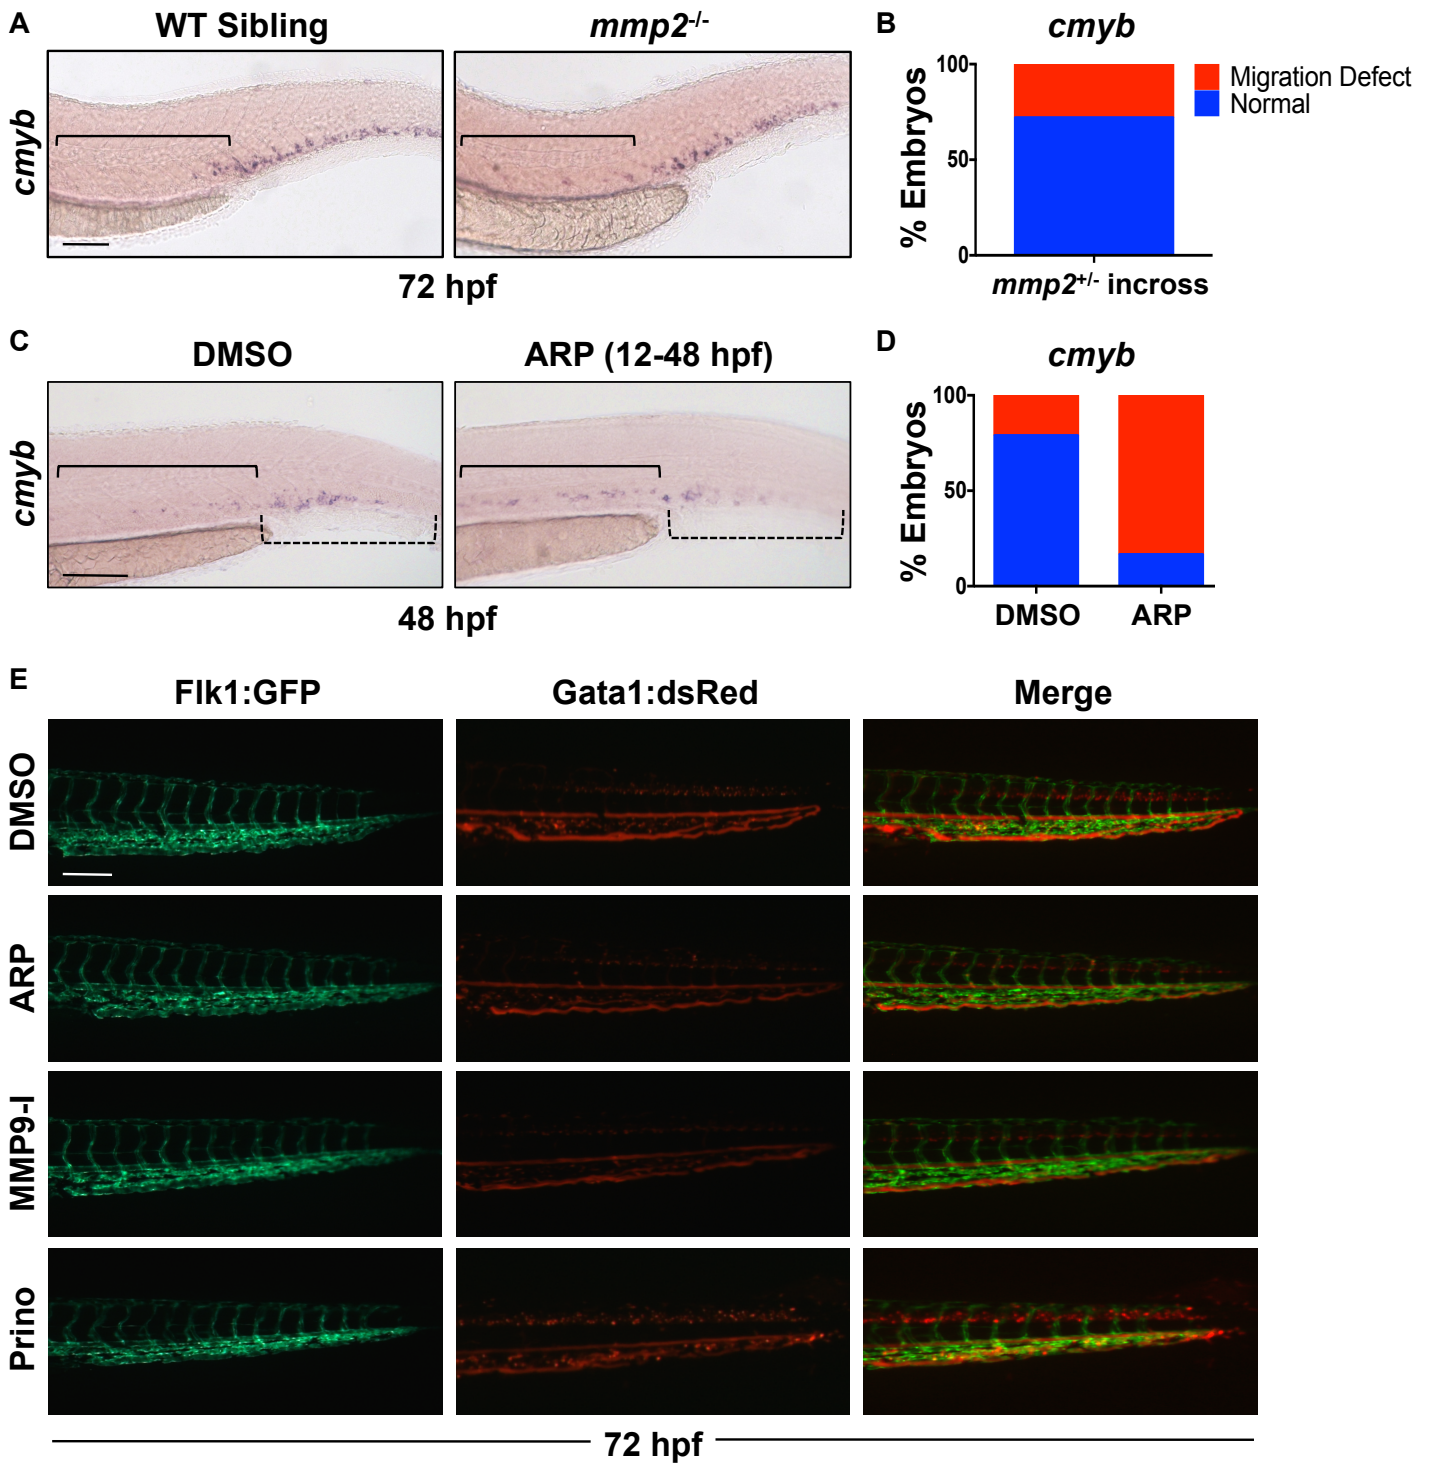

Supplemental Figure 6

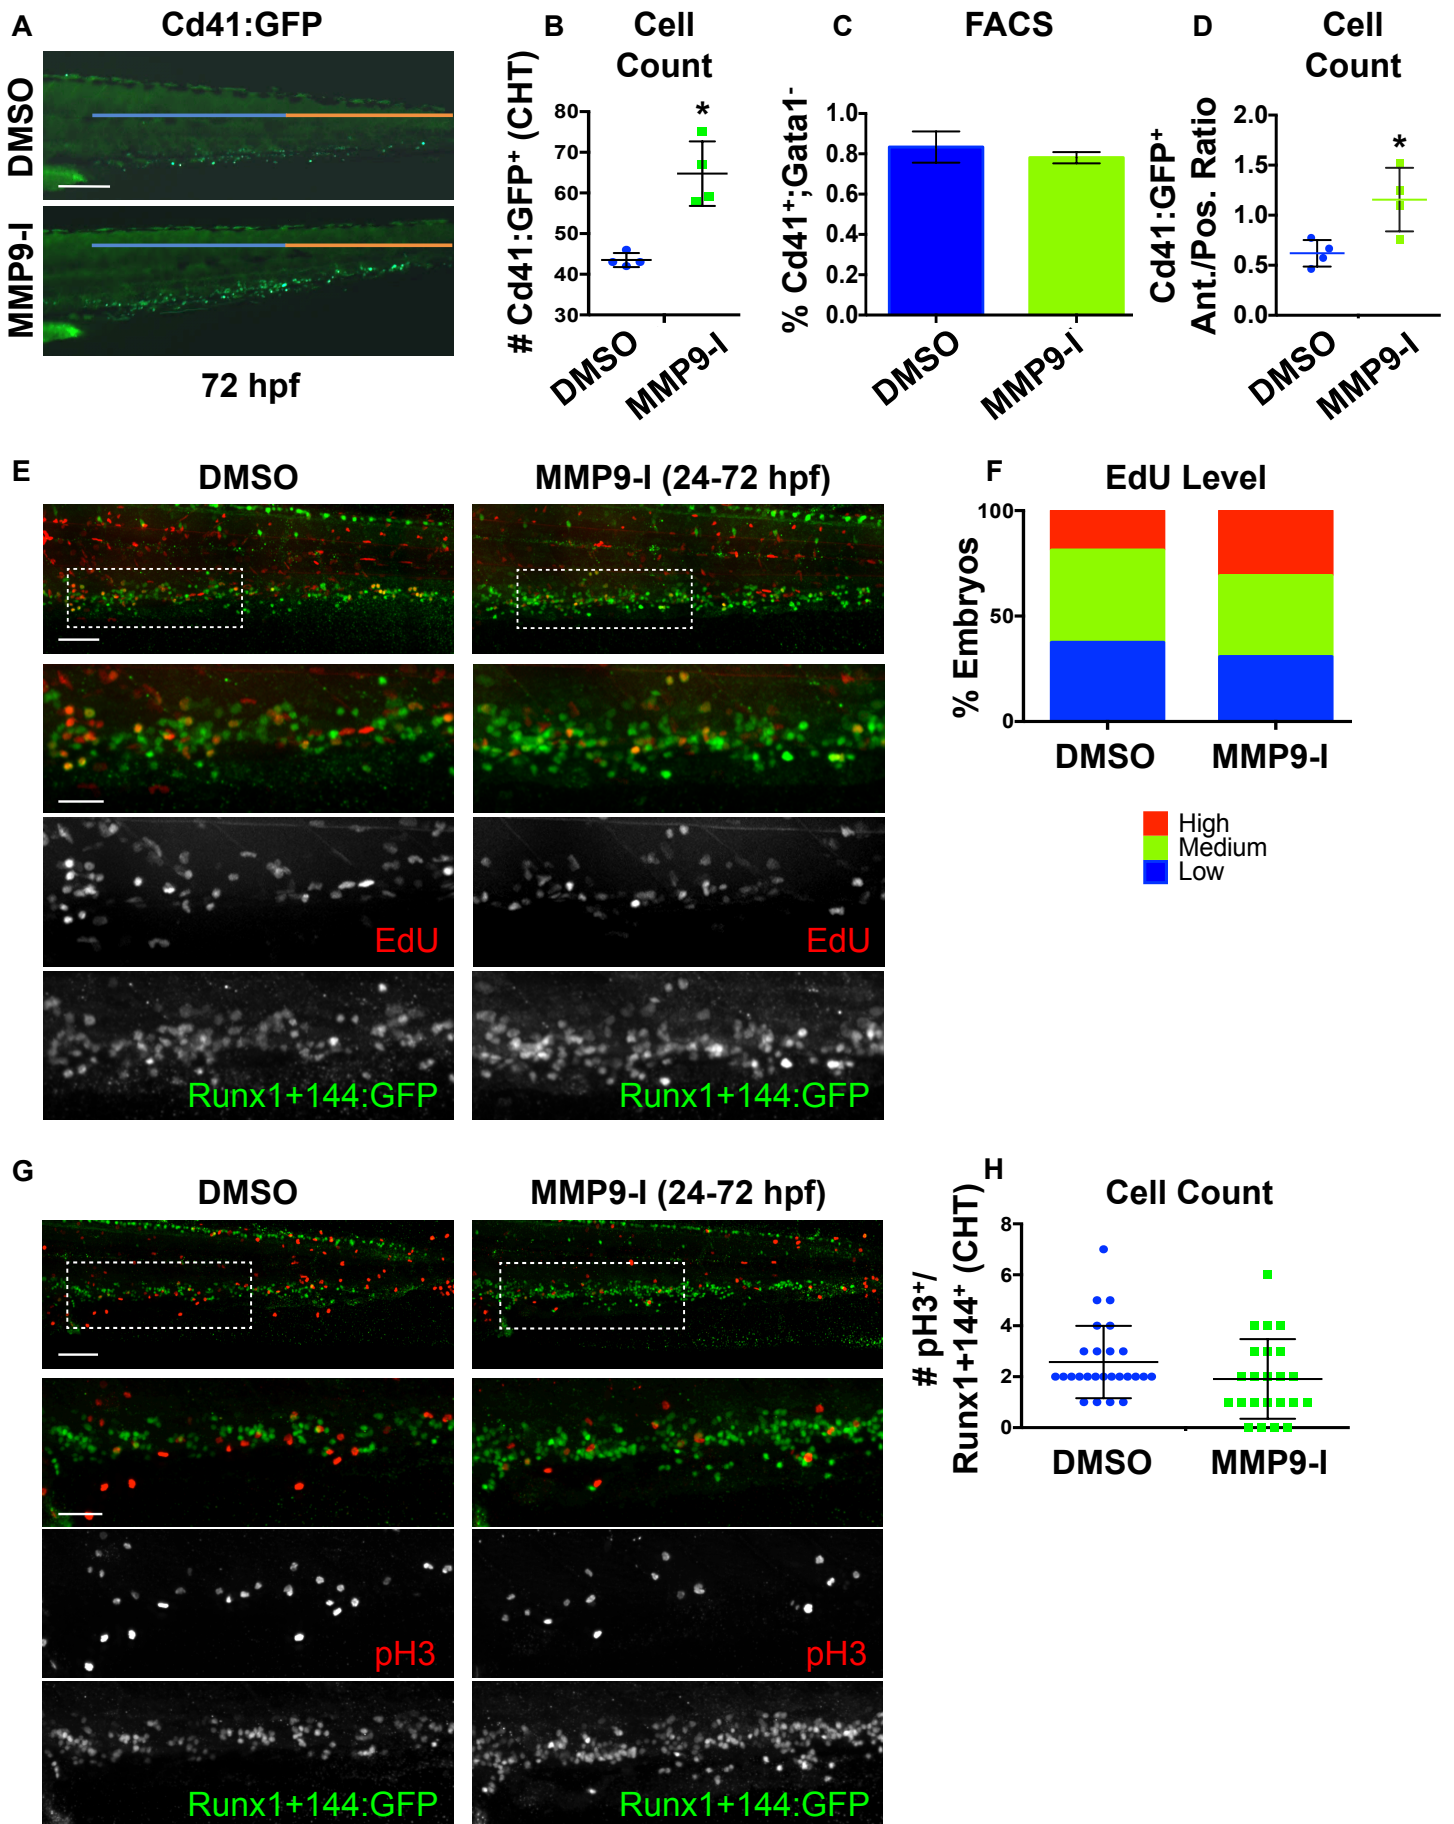

Supplemental Figure 7

A

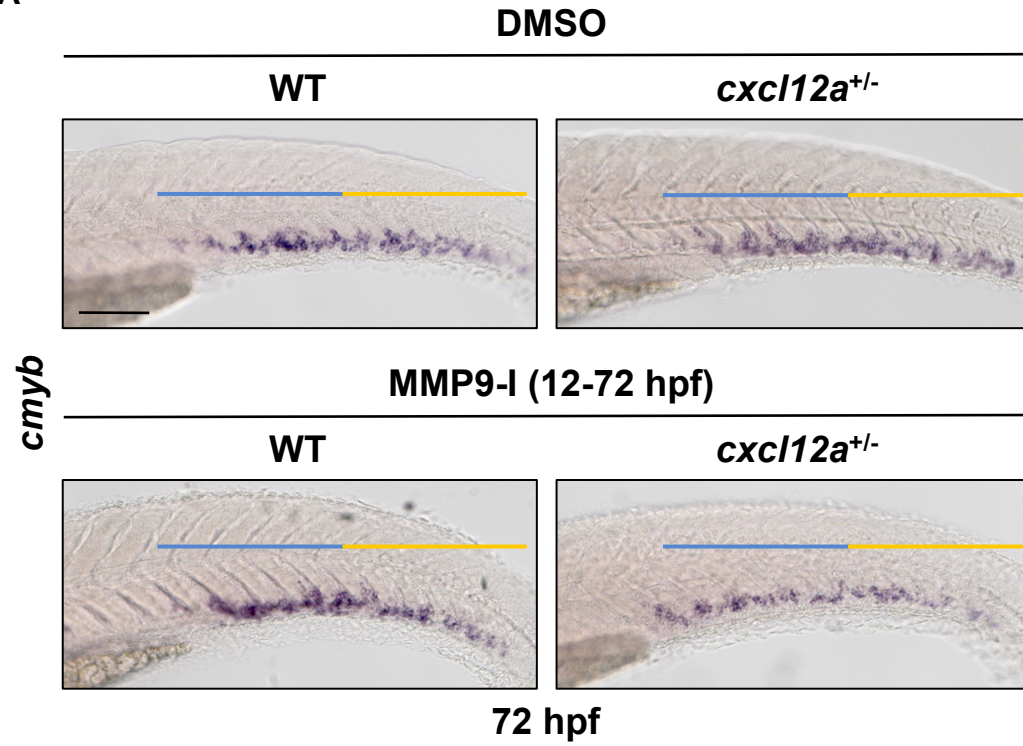

B

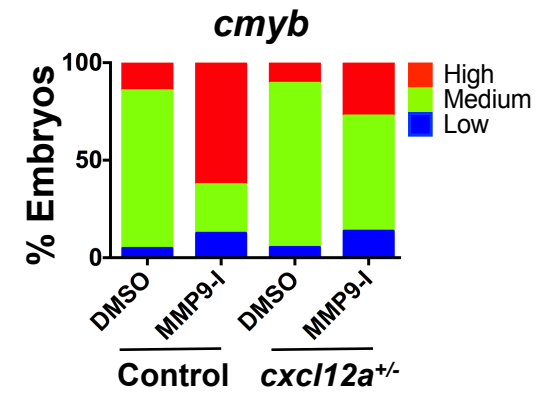

## SUPPLEMENTAL EXPERIMENTAL PROCEDURES

### *Transgenic and Mutant Zebrafish Lines* (related to Zebrafish Husbandry)

| Official Line Name                          | Common Name                           | Reference                                                        |
|---------------------------------------------|---------------------------------------|------------------------------------------------------------------|
| <i>Tg(-6.0itga2b:egfp)</i>                  | Cd41:GFP                              | (Bertrand et al., 2008)                                          |
| <i>Tg(kdrl:gfp)</i>                         | Flk1:GFP                              | (Choi et al., 2007)                                              |
| <i>Tg(kdrl:dsred2)</i>                      | Flk1:dsRed                            | (Kikuchi et al., 2011)                                           |
| <i>Tg(cmyb:egfp)</i>                        | cMyb:GFP                              | (North et al., 2007)                                             |
| <i>Tg(gata1a:dsRed)</i>                     | Gata1:dsRed                           | (Traver et al., 2003)                                            |
| <i>Tg(runx+23<sup>(144-378)</sup>:egfp)</i> | Runx1+144:GFP                         | <i>see description below</i>                                     |
| <i>Tg(runx1P2:egfp)</i>                     | Runx1:GFP                             | (Lam et al., 2010)                                               |
| <i>fn1a<sup>tl43c/tl43c</sup></i>           | <i>natter</i> , fibronectin mutant    | (Trinh and Stainier, 2004)                                       |
| <i>Tg(hsp70l:cxcl12b-egfp)</i>              | Hsp70:Cxcl12b                         | (Li et al., 2005)                                                |
| <i>cxcl12a<sup>t30516/t30516</sup></i>      | <i>medusa</i> , <i>cxcl12a</i> mutant | (Valentin et al., 2007)                                          |
| <i>mmp2<sup>hu10535</sup></i>               | <i>mmp2</i> mutant                    | (Kok et al., 2015)                                               |
| <i>Tg(mpeg1:gal4;uas:nfsb-mcherry)</i>      | Mpeg1:NTR                             | (Davison et al., 2007; Ellett et al., 2011)                      |
| <i>Tg(mpx:gal4;uas:nfsb-mcherry)</i>        | Mpx:NTR                               | (Davison et al., 2007; Robertson et al., 2014)                   |
| <i>Tg(EF1:mAG-zGem(1/100))rw0410h)</i>      | mAG-zGEM                              | (Sugiyama et al., 2009)                                          |
| <i>Tg(runx1+23:egfp)</i>                    | Runx1+23:GFP                          | <i>see description below [similar to (Tamplin et al., 2015)]</i> |
| <i>Tg(mpeg1:mcherry)</i>                    | Mpeg1:mCherry                         | (Ellett et al., 2011)                                            |
| <i>Tg(mpx:egfp)</i>                         | Mpx:GFP                               | (Renshaw et al., 2006)                                           |
| <i>Tg(rag2:dsred)zf411</i>                  | Rag2:dsRed                            | (Ma et al., 2012)                                                |

**Morpholino Sequences** (related to Morpholino Injections)

| Gene           | Morpholino                          | Reference                |
|----------------|-------------------------------------|--------------------------|
| <i>mmp2</i>    | 5' - GTGGCGAACAGCCCTTTCAGACGTG - 3' | (Coyle et al., 2008)     |
| <i>mmp9</i>    | 5'-CGCCAGGACTCCAAGTCTCATTTTG- 3'    | (Volkman et al., 2010)   |
| <i>excl12a</i> | 5'-CTACTACGATCACTTTGAGATCCAT-3'     | (Doitsidou et al., 2002) |

**qPCR Primers** (related to RNA Extraction and qRT-PCR)

| Gene        | Forward               | Reverse              | Reference            |
|-------------|-----------------------|----------------------|----------------------|
| <i>mmp2</i> | GCTGTTCCCGATGACCTAGA  | GCTGTCATTTCTGGCCATTT |                      |
| <i>mmp9</i> | TTGCCTTTTCCTCTCTGCAT  | TCATGATCTCTGCGAAGTGG | (Esain et al., 2015) |
| <i>18s</i>  | TCGCTAGTTGGCATCGTTTAT | CGGAGGTTCGAAGACGATCA | (Esain et al., 2015) |

**Small Molecules**

| Drug         | Target             | Dose          | Supplier        | Reference                  |
|--------------|--------------------|---------------|-----------------|----------------------------|
| ARP-101      | MMP2               | 10 $\mu$ M    | Tocris          |                            |
| MMP9-I       | MMP9               | 5 $\mu$ M     | Merck Millipore |                            |
| Prinomastat  | MMP2/MMP9          | 20 $\mu$ M    | Sigma-Aldrich   |                            |
| SB-3CT       | MMP2/MMP9          | 1, 10 $\mu$ M | Sigma-Aldrich   | (Travnickova et al., 2015) |
| dmPGE2       |                    | 10 $\mu$ M    | Cayman Chemical | (North et al., 2007)       |
| Indomethacin | Cyclooxygenase 1/2 | 10 $\mu$ M    | Sigma-Aldrich   | (North et al., 2007)       |
| CAY10397     | PGDH               | 10 $\mu$ M    | Cayman Chemical | (Nissim et al., 2014)      |

**Antibodies**

| Antibody                                      | Species | Source                           | Catalog Number |
|-----------------------------------------------|---------|----------------------------------|----------------|
| Fibronectin                                   | Rabbit  | Sigma-Aldrich                    | F3648          |
| Anti-phospho-Histone H3 (pSer <sup>10</sup> ) | Rabbit  | EMD Millipore                    | 06-570         |
| GFP                                           | Rabbit  | Millipore (Sigma-Aldrich)        | AB3080         |
| GFP                                           | Chicken | GeneTex                          | GTX13970       |
| Anti-rabbit IgG, Alexa Fluor 488              | Goat    | Molecular Probes (Thermo Fisher) | A-11034        |



|                                   |      |                                  |         |
|-----------------------------------|------|----------------------------------|---------|
| Anti-rabbit IgG, Alexa Fluor 568  | Goat | Molecular Probes (Thermo Fisher) | A-11011 |
| Anti-chicken IgG, Alexa Fluor 488 | Goat | Molecular Probes (Thermo Fisher) | A-11039 |

***Generation of the  $Tg(runx1+23(144-378):egfp)$  HSPC reporter transgenic zebrafish line***

A 235 base pair fragment corresponding to region 144-378 of +23 Runx1 murine enhancer (Nottingham, et al. 2007), as well as the full enhancer region, were amplified from mouse genomic DNA with the following primers: Runx1+144Fwd-5'-GGGGCCCTCACTACCTCTTTTCTTCTC-3' and Runx1+144Rev-5'-GTGTGAGGAGGAGACAGGAAGAAGGGAGGC-3' or Runx1+23Fwd-5' - GGGGGTGGGAGGTGTAAGTTC-3' and Runx1+23Rev-5' -CCAGGTGTCAGCAACCCATC-3', and cloned into pT2-cfos-EGFP (Fisher et al., 2006).  $Tg(runx1+23:egfp)$  and  $Tg(runx1+23^{(144-378)}:egfp)$  transgenic fish were generated by co-injection of the Tol2-transposase mRNA (Kwan et al., 2007) into 1-cell stage embryos and transgenic F<sub>0</sub> founders were identified by eGFP expression in the AGM.

**SUPPLEMENTAL REFERENCES**

Bertrand, J.Y., Kim, A.D., Teng, S., and Traver, D. (2008). CD41+ cmyb+ precursors colonize the zebrafish pronephros by a novel migration route to initiate adult hematopoiesis. *Development* 135, 1853–1862.

Choi, J., Dong, L., Ahn, J., Dao, D., Hammerschmidt, M., and Chen, J.-N. (2007). FoxH1 negatively modulates flk1 gene expression and vascular formation in zebrafish. *Developmental Biology* 304, 735–744.

Coyle, R.C., Latimer, A., and Jessen, J.R. (2008). Membrane-type 1 matrix metalloproteinase regulates cell migration during zebrafish gastrulation: Evidence for an interaction with non-canonical Wnt signaling. *Experimental Cell Research* 314, 2150–2162.

Davison, J.M., Akitake, C.M., Goll, M.G., Rhee, J.M., Gosse, N., Baier, H., Halpern, M.E., Leach, S.D.,

and Parsons, M.J. (2007). Transactivation from Gal4-VP16 transgenic insertions for tissue-specific cell labeling and ablation in zebrafish. *Developmental Biology* 304, 811–824.

Doitsidou, M., Reichman-Fried, M., Stebler, J., Köprunner, M., Dörries, J., Meyer, D., Esguerra, C.V., Leung, T., and Raz, E. (2002). Guidance of primordial germ cell migration by the chemokine SDF-1. *Cell* 111, 647–659.

Ellett, F., Pase, L., Hayman, J.W., Andrianopoulos, A., and Lieschke, G.J. (2011). mpeg1 promoter transgenes direct macrophage-lineage expression in zebrafish. *Blood* 117, e49–e56.

Esain, V., Kwan, W., Carroll, K.J., Cortes, M., Liu, S.Y., Frechette, G.M., Sheward, L.M.V., Nissim, S., Goessling, W., and North, T.E. (2015). Cannabinoid Receptor-2 Regulates Embryonic Hematopoietic Stem Cell Development via Prostaglandin E2 and P-Selectin Activity. *Stem Cells* 33, 2596–2612.

Fisher, S., Grice, E.A., Vinton, R.M., Bessling, S.L., Urasaki, A., Kawakami, K., and McCallion, A.S. (2006). Evaluating the biological relevance of putative enhancers using Tol2 transposon-mediated transgenesis in zebrafish. *Nat Protoc* 1, 1297–1305.

Goessling, W., North, T.E., Loewer, S., Lord, A.M., Lee, S., Stoick-Cooper, C.L., Weidinger, G., Puder, M., Daley, G.Q., Moon, R.T., et al. (2009). Genetic Interaction of PGE2 and Wnt Signaling Regulates Developmental Specification of Stem Cells and Regeneration. *Cell* 136, 1136–1147.

Kikuchi, K., Holdway, J.E., Major, R.J., Blum, N., Dahn, R.D., Begemann, G., and Poss, K.D. (2011). Retinoic Acid Production by Endocardium and Epicardium Is an Injury Response Essential for Zebrafish Heart Regeneration. *Developmental Cell* 20, 397–404.

Kok, F.O., Shin, M., Ni, C.-W., Gupta, A., Grosse, A.S., van Impel, A., Kirchmaier, B.C., Peterson-Maduro, J., Kourkoulis, G., Male, I., et al. (2015). Reverse Genetic Screening Reveals Poor Correlation between Morpholino-Induced and Mutant Phenotypes in Zebrafish. *Developmental Cell* 32, 97–108.

Kwan, K.M., Fujimoto, E., Grabher, C., Mangum, B.D., Hardy, M.E., Campbell, D.S., Parant, J.M., Yost, H.J., Kanki, J.P., and Chien, C.-B. (2007). The Tol2kit: A multisite gateway-based construction kit for Tol2 transposon transgenesis constructs. *Developmental Dynamics* 236, 3088–3099.

Lam, E.Y.N., Hall, C.J., Crosier, P.S., Crosier, K.E., and Flores, M.V. (2010). Live imaging of Runx1 expression in the dorsal aorta tracks the emergence of blood progenitors from endothelial cells. *Blood* 116, 909–914.

Li, Q., Shirabe, K., Thisse, C., Thisse, B., Okamoto, H., Masai, I., and Kuwada, J.Y. (2005). Chemokine signaling guides axons within the retina in zebrafish. *J. Neurosci.* 25, 1711–1717.

Ma, D., Wang, L., Wang, S., Gao, Y., Wei, Y., and Liu, F. (2012). Foxn1 maintains thymic epithelial cells to support T-cell development via mcm2 in zebrafish. *Proc. Natl. Acad. Sci. U.S.a.* 109, 21040–21045.

Nissim, S., Sherwood, R.I., Wucherpfennig, J., Saunders, D., Harris, J.M., Esain, V., Carroll, K.J., Frechette, G.M., Kim, A.J., Hwang, K.L., et al. (2014). Prostaglandin E2 Regulates Liver versus Pancreas Cell-Fate Decisions and Endodermal Outgrowth. *Developmental Cell* 28, 423–437.

North, T.E., Goessling, W., Walkley, C.R., Lengerke, C., Kopani, K.R., Lord, A.M., Weber, G.J., Bowman, T.V., Jang, I.-H., Grosser, T., et al. (2007). Prostaglandin E2 regulates vertebrate haematopoietic stem cell homeostasis. *Nature* 447, 1007–1011.

Nottingham, W.T., Jarratt, A., Burgess, M., Speck, C.L., Cheng, J.-F., Prabhakar, S., Rubin, E.M., Li, P.-S., Sloane-Stanley, J., Kong-A-San, J., et al. (2007). Runx1-mediated hematopoietic stem-cell emergence is controlled by a Gata/Ets/SCL-regulated enhancer. *Blood* 110, 4188–4197.

Renshaw, S.A., Loynes, C.A., Trushell, D.M.I., Elworthy, S., Ingham, P.W., and Whyte, M.K.B. (2006). A transgenic zebrafish model of neutrophilic inflammation. *Blood* 108, 3976–3978.

Robertson, A.L., Holmes, G.R., Bojarczuk, A.N., Burgon, J., Loynes, C.A., Chimen, M., Sawtell, A.K., Hamza, B., Willson, J., Walmsley, S.R., et al. (2014). A zebrafish compound screen reveals modulation of neutrophil reverse migration as an anti-inflammatory mechanism. *Sci Transl Med* *6*, 225ra29–225ra29.

Sugiyama, M., Sakaue-Sawano, A., Iimura, T., Fukami, K., Kitaguchi, T., Kawakami, K., Okamoto, H., Higashijima, S.-I., and Miyawaki, A. (2009). Illuminating cell-cycle progression in the developing zebrafish embryo. *Proc. Natl. Acad. Sci. U.S.A.* *106*, 20812–20817.

Tamplin, O.J., Durand, E.M., Carr, L.A., Childs, S.J., Hagedorn, E.J., Li, P., Yzaguirre, A.D., Speck, N.A., and Zon, L.I. (2015). Hematopoietic Stem Cell Arrival Triggers Dynamic Remodeling of the Perivascular Niche. *Cell* *160*, 241–252.

Traver, D., Paw, B.H., Poss, K.D., Penberthy, W.T., Lin, S., and Zon, L.I. (2003). Transplantation and in vivo imaging of multilineage engraftment in zebrafish bloodless mutants. *Nat Immunol* *4*, 1238–1246.

Travnickova, J., Tran Chau, V., Julien, E., Mateos-Langerak, J., Gonzalez, C., Lelièvre, E., Lutfalla, G., Taviani, M., and Kissa, K. (2015). Primitive macrophages control HSPC mobilization and definitive haematopoiesis. *Nat Commun* *6*, 6227.

Trinh, L.A., and Stainier, D.Y.R. (2004). Fibronectin Regulates Epithelial Organization during Myocardial Migration in Zebrafish. *Developmental Cell* *6*, 371–382.

Valentin, G., Haas, P., and Gilmour, D. (2007). The Chemokine SDF1a Coordinates Tissue Migration through the Spatially Restricted Activation of Cxcr7 and Cxcr4b. *Current Biology* *17*, 1026–1031.

Volkman, H.E., Pozos, T.C., Zheng, J., Davis, J.M., Rawls, J.F., and Ramakrishnan, L. (2010). Tuberculous Granuloma Induction via Interaction of a Bacterial Secreted Protein with Host Epithelium. *Science* *327*, 466–469.
