# Supplementary material for: Distinct Roles for Matrix Metalloproteinases 2 and 9 in Embryonic Hematopoietic Stem Cell Emergence, Migration, and Niche Colonization
Source: PubMed Central journal article supplement — Stem Cell Reports. 2017 Apr 13;8(5):1226–41. doi: 10.1016/j.stemcr.2017.03.016 (PMC5425629; doi:10.1016/j.stemcr.2017.03.016), 2017-04-13
Supplement: mmc6.pdf [file mmc6.pdf]

# Distinct Roles for Matrix Metalloproteinases 2 and 9 in Embryonic Hematopoietic Stem Cell Emergence, Migration, and Niche Colonization

Lindsay N. Theodore,<sup>1,4</sup> Elliott J. Hagedorn,<sup>2,4</sup> Mauricio Cortes,<sup>1,4</sup> Kelsey Natsuhara,<sup>1</sup> Sarah Y. Liu,<sup>1</sup> Julie R. Perlin,<sup>2</sup> Song Yang,<sup>2</sup> Madeleine L. Daily,<sup>2</sup> Leonard I. Zon,<sup>2,3</sup> and Trista E. North<sup>1,3,\*</sup>

<sup>1</sup>Beth Israel Deaconess Medical Center, Harvard Medical School, Center for Life Sciences, 3 Blackfan Circle

<sup>2</sup>Stem Cell Program, Division of Hematology/Oncology, Boston Children's Hospital, Harvard Medical School  
Boston, MA 02115, USA

<sup>3</sup>Harvard Stem Cell Institute, Harvard University, Cambridge, MA 02138, USA

<sup>4</sup>Co-first author

\*Correspondence: [tnorth@bidmc.harvard.edu](mailto:tnorth@bidmc.harvard.edu)

<http://dx.doi.org/10.1016/j.stemcr.2017.03.016>

## SUMMARY

Hematopoietic stem/progenitor cells (HSPCs) are formed during ontogeny from hemogenic endothelium in the ventral wall of the dorsal aorta (VDA). Critically, the cellular mechanism(s) allowing HSPC egress and migration to secondary niches are incompletely understood. Matrix metalloproteinases (MMPs) are inflammation-responsive proteins that regulate extracellular matrix (ECM) remodeling, cellular interactions, and signaling. Here, inhibition of vascular-associated Mmp2 function caused accumulation of fibronectin-rich ECM, retention of *runx1/cmyb*<sup>+</sup> HSPCs in the VDA, and delayed caudal hematopoietic tissue (CHT) colonization; these defects were absent in *fibronectin* mutants, indicating that Mmp2 facilitates endothelial-to-hematopoietic transition via ECM remodeling. In contrast, Mmp9 was dispensable for HSPC budding, being instead required for proper colonization of secondary niches. Significantly, these migration defects were mimicked by overexpression and blocked by knockdown of *C-X-C motif chemokine-12 (cxcl12)*, suggesting that Mmp9 controls CHT homeostasis through chemokine regulation. Our findings indicate Mmp2 and Mmp9 play distinct but complementary roles in developmental HSPC production and migration.

## INTRODUCTION

Hematopoietic stem cells (HSCs) are defined by their life-long ability to self-renew and generate each blood cell type. In vertebrates, HSCs first emerge from the ventral wall of the dorsal aorta (VDA) in the aorta-gonad-mesonephros (AGM) region of the developing embryo (Dzierzak and Speck, 2008). The process of de novo HSC production, termed endothelial-to-hematopoietic transition (EHT), involves the specification, budding, and egress of select hemogenic endothelial cells into circulation. As this process proceeds, hemogenic endothelial cells acquire markers of HSC identity, and once EHT is complete, begin migration to secondary niches to expand in number and differentiate (Bertrand et al., 2010; Kissa and Herbomel, 2010). Endothelial cells slated to undergo EHT are specified by sequential actions of the Hedgehog and vascular endothelial growth factor (VEGF) pathways, which in turn activate Notch (Carroll and North, 2014). Notch signaling in the VDA is responsible for *runx1* induction via *scl* and *gata2*; Runx1 function is required for EHT and HSC production (Chen et al., 2009; Kissa and Herbomel, 2010; North et al., 1999). While factors necessary for VDA specification and EHT are increasingly defined (Carroll and North, 2014), the mechanisms by which hemogenic endothelium is structurally remodeled to allow hematopoietic stem and progenitor cell (HSPC) budding, egress, and subsequent migration to intermediate and adult niches are incompletely understood.

In the mouse, HSCs are present in the AGM, umbilical and vitelline arteries by embryonic day 10.5 (E10.5), followed shortly by the placenta. Newly formed HSCs migrate via the circulation to the fetal liver (FL), a transient niche, to mature and proliferate. After leaving the FL, HSCs migrate to sites of adult hematopoiesis, seeding the thymus at E11.5, the spleen at E12.5, and finally the bone marrow (BM) by E15 (Dzierzak and Speck, 2008). In zebrafish embryos, de novo specified HSCs begin to bud from the VDA by 28 hours post fertilization (hpf), then migrate to the caudal hematopoietic tissue (CHT; mammalian fetal liver equivalent) from 36 to 72 hpf to proliferate and differentiate into committed progenitors. Shortly thereafter, HSPCs leave the CHT and populate the adult sites of hematopoiesis, the thymus and kidney marrow (Carroll and North, 2014). This general pattern of sequential migrations between hematopoietic niches is evolutionarily conserved (Dzierzak and Speck, 2008) and presumed to be essential for proper HSPC development and function. We and others have determined that sterile inflammatory signaling regulates HSPC production in vertebrate embryos (Espín-Palazón et al., 2014; He et al., 2015; Li et al., 2014; Sawamiphak et al., 2014). Similarly, we have previously shown that the well-known inflammatory factor prostaglandin E<sub>2</sub> (PGE<sub>2</sub>) increases HSC numbers (North et al., 2007) and affects CXCL12/CXCR4-mediated HSPC homing to the adult niche across species (Goessling et al., 2011). However, the detailed mechanism(s) by which inflammatory signals

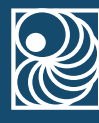

influence HSPC development, including EHT and migratory behavior, are largely unknown.

The extracellular matrix (ECM) is a network of secreted proteins that function in concert to structurally support cells and regulate cellular processes (Rozario and DeSimone, 2010). The ECM is an important component of the BM hematopoietic microenvironment, where it can sequester cytokines and regulate their downstream signaling (Davis and Senger, 2005); developmental niches such as the AGM and fetal liver are also ECM rich (Marshall et al., 1999). ECM structure is highly dynamic and actively remodeled by degrading proteases known as matrix metalloproteinases (MMPs) (Heissig et al., 2003). MMPs are well-characterized inflammatory mediators (Parks et al., 2004) that perform a variety of distinct and overlapping biological functions depending on their spatiotemporal localization. In particular, MMP2 and MMP9, which represent the gelatinase family, have been implicated in angiogenic ECM remodeling downstream of Notch and VEGF signaling (Funahashi et al., 2011). As Notch and VEGF are essential for HSPC formation, and given the connections between inflammatory activity and HSC production, we sought to investigate the functional requirement(s) for gelatinase activity during embryonic HSPC development.

Here, we demonstrate that Mmp2 and Mmp9 are induced in response to inflammatory signals to perform necessary, but spatially and temporally distinct, functions during definitive hematopoiesis. Mmp2 facilitates the completion of EHT, including egress from the VDA and HSPC migration from the AGM to the CHT, by modulating levels of fibronectin-rich ECM. In contrast, Mmp9 influences embryonic Cxcl12 activity, affecting the physical structure of the CHT niche as well as HSPC colonization and retention therein, to affect subsequent migration to adult niches. These *in vivo* studies highlight the essential role of Mmp2 and Mmp9 in regulating HSPC production and migration to establish lifelong hematopoiesis during embryonic development.

## RESULTS

### Gelatinase Expression Is Regulated by Sterile Inflammatory Signaling

We previously reported that exposure of BM or umbilical cord blood to PGE<sub>2</sub> induced expression of a number of inflammatory intermediates, including matrix remodeling enzymes of the MMP family (Goessling et al., 2009). As ECM remodeling is essential in the BM microenvironment (Davis and Senger, 2005) and inflammation influences HSC production, we sought to determine whether inflammation-induced Mmp activity affected the onset or progression of embryonic HSPC development. Consistent with

prior observations (Esain et al., 2015), exposure to CAY10397 (10  $\mu$ M, 12–36 hpf), a selective 15-hydroxyprostaglandin dehydrogenase (15-PGDH) inhibitor that stabilizes endogenous PGE<sub>2</sub> levels, enhanced expression of the conserved HSPC markers *runx1* and *cmyb* by whole-mount *in situ* hybridization (WISH) (Figures S1A and S1B). In addition to a potent effect on *runx1* ( $p < 0.01$ ), CAY10397 also significantly increased the expression of *mmp2* ( $p < 0.05$ ) and *mmp9* ( $p < 0.01$ ) by qPCR at 42 hpf (Figure 1A). This effect was confirmed by WISH, whereby CAY10397 notably enhanced *mmp2* and *mmp9* expression over controls at 36 hpf (Figure 1B). In contrast, indomethacin (10  $\mu$ M), a pan-cyclooxygenase inhibitor that inhibits PGE<sub>2</sub> production and HSPC formation (North et al., 2007), decreased both *mmp2* and *mmp9* expression by qPCR and WISH (Figures 1A and 1B). Together, these data indicate that endogenous PGE<sub>2</sub>-associated basal inflammatory activity affects embryonic gelatinase expression.

To investigate the cellular associations of *mmp2* and *mmp9* expression with developmental hematopoiesis, we performed time-course WISH analysis (18–72 hpf). Prominent *mmp2* expression was seen in the trunk, including the vasculature and adjacent mesenchyme, at all time points (Figure 1C), consistent with prior reports (Detry et al., 2012). qPCR analysis of fluorescence-activated cell sorting (FACS)-isolated fractions from *Tg(kdrl:dsred; cmyb:gfp)* embryos confirmed *mmp2* expression in the Flk1:dsRed<sup>+</sup>cMyb:GFP<sup>+</sup> vasculature as well as double-negative fraction (Figure S1C). In contrast, by WISH, *mmp9* expression was punctate in appearance, primarily associated with cells within the vasculature, and noticeably enriched in the tail during the developmental windows examined (Figure 1C). As qPCR of the sorted fractions showed broad *mmp9* expression (Figure S1C) and HSPCs are not robustly present in the circulation at 30 hpf, RNA sequencing (RNA-seq) analysis was used to further clarify the main cellular source of *mmp9* expression. Primitive macrophages and neutrophils were isolated from *Tg(mpeg1:mcherry; mpx:gfp)* embryos by FACS at 72 hpf (1,000 pooled embryos, >50,000 cells/fraction). While low *mmp9* expression was detected in Mpeg1<sup>+</sup> macrophages, consistent with prior observations (Travnickova et al., 2015), *mmp9* levels were nearly 200-fold higher in Mpx<sup>+</sup> neutrophils (Figure S1D). To confirm these results, we employed a targeted ablation strategy using tissue-specific expression of nitroreductase (NfsB) (Curado et al., 2008): *Tg(mpeg1:gal4;uas:nfsb-mcherry)* (macrophage) or *Tg(mpx:gal4;uas:nfsb-mcherry)* (neutrophil) embryos were exposed to metronidazole (Mtz; 24–48 hpf), then assayed for *mmp9* expression by WISH. Loss of Mpeg1<sup>+</sup> macrophages had no visible impact on *mmp9* levels (Figures S1E and S1F); in contrast, ablation of Mpx<sup>+</sup> neutrophils dramatically reduced *mmp9* in the majority of embryos examined. Together, these data indicate that

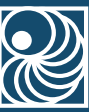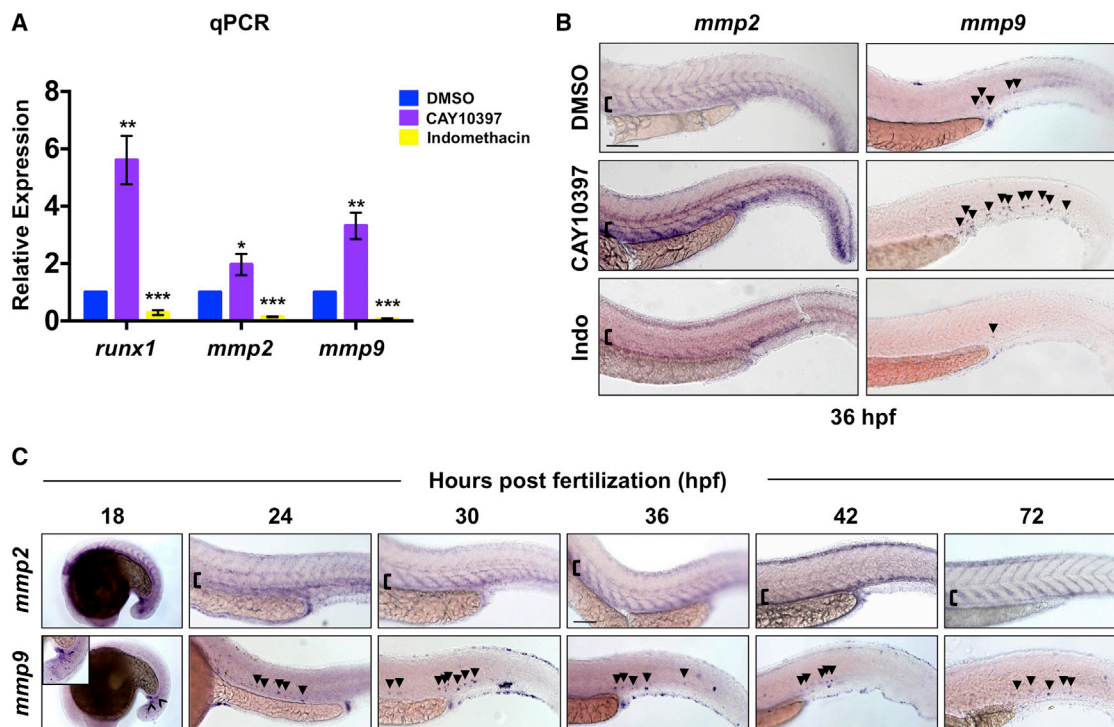

**Figure 1. Inflammatory Activity Regulates Mmp2 and Mmp9 Expression in the VDA**

(A) *runx1*, *mmp2*, and *mmp9* expression was enhanced following exposure (36–42 hpf) to CAY10397 (10  $\mu$ M) but decreased by indomethacin (10  $\mu$ M), as determined by qPCR (\* $p < 0.05$ , \*\* $p < 0.01$ , \*\*\* $p < 0.001$ ; 40 pooled embryos/condition  $\times$  3 replicates).

(B) CAY10397 (12–36 hpf) increased *mmp2* and *mmp9* expression, while indomethacin (Indo) diminished expression by WISH ( $n \geq 20$  condition).

(C) WISH time course (18–72 hpf) for *mmp2* and *mmp9* expression ( $n$  value as in B).

Arrowheads mark *mmp9*<sup>+</sup> cells; brackets mark dorsal/ventral boundaries of the VDA and CV. Scale bars, 100  $\mu$ m.

inflammatory-responsive Mmp2 and Mmp9 are present in discrete cellular subsets in the hematopoietic niche during embryonic HSPC production.

### Mmp2 Inhibition Alters HSPC Egress from the VDA

To assess the role of gelatinase activity in HSPC specification and budding, we exposed zebrafish embryos to pangenelatinase inhibitors prinomastat (AG-3340) and SB-3CT from 12 to 36 hpf. While later exposure was tolerated, SB-3CT was toxic at published doses (Travnickova et al., 2015) during the earliest stages of HSPC development (Figures S2A–S2H), precluding evaluation. In contrast, compared with controls, prinomastat (20  $\mu$ M) treatment altered expression of *runx1/cmyb* in the AGM at 36 hpf (Figures 2A and 2B); however, the Flk1:GFP<sup>+</sup> trunk vasculature (Figure 2C) and *ephrinb2*<sup>+</sup> VDA (Figure S2I), appeared structurally and developmentally normal. Prinomastat exposure changed the normal “beads on a string” pattern, consisting of a continuous row of flattened *runx1*<sup>+</sup> hemogenic endothelial cells and occasional newly formed *cmyb*<sup>+</sup> buds of 1–2 cells, to a disrupted and clumped arrangement (Fig-

ures 2A and 2B). To determine which gelatinase contributed to this phenotype, we exposed embryos to either the selective MMP2 inhibitor ARP-101 (ARP; 10  $\mu$ M) or the MMP9 inhibitor MMP9-I (5  $\mu$ M). ARP treatment (12–36 hpf) phenocopied the effect of prinomastat on *runx1/cmyb* patterning, with expression gaps and clumps of HSPCs in the VDA (Figures 2A and 2B), but normal vessel patterning (Figures 2C and S2I). In contrast, MMP9-I had no effect on the AGM at this stage of development. Importantly, neither prinomastat nor ARP altered total Flk1:dsRed<sup>+</sup>/cMyb:GFP<sup>+</sup> HSPC number by FACS (Figure 2D), nor was there any effect on cell death in the AGM compared with controls by acridine orange analysis at 36 hpf (Figures S2J and S2K).

Morpholino (MO) knockdown confirmed the chemical inhibition experiments and highlighted compound specificity: *mmp2* morphants displayed altered *runx1/cmyb* expression (Figures 2E and 2F), similar to ARP treatment, while *mmp9* morphants had no VDA phenotype at 36 hpf. Again, neither *mmp2* nor *mmp9* knockdown significantly affected overall vascular structure (Figure 2G) or

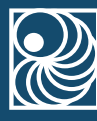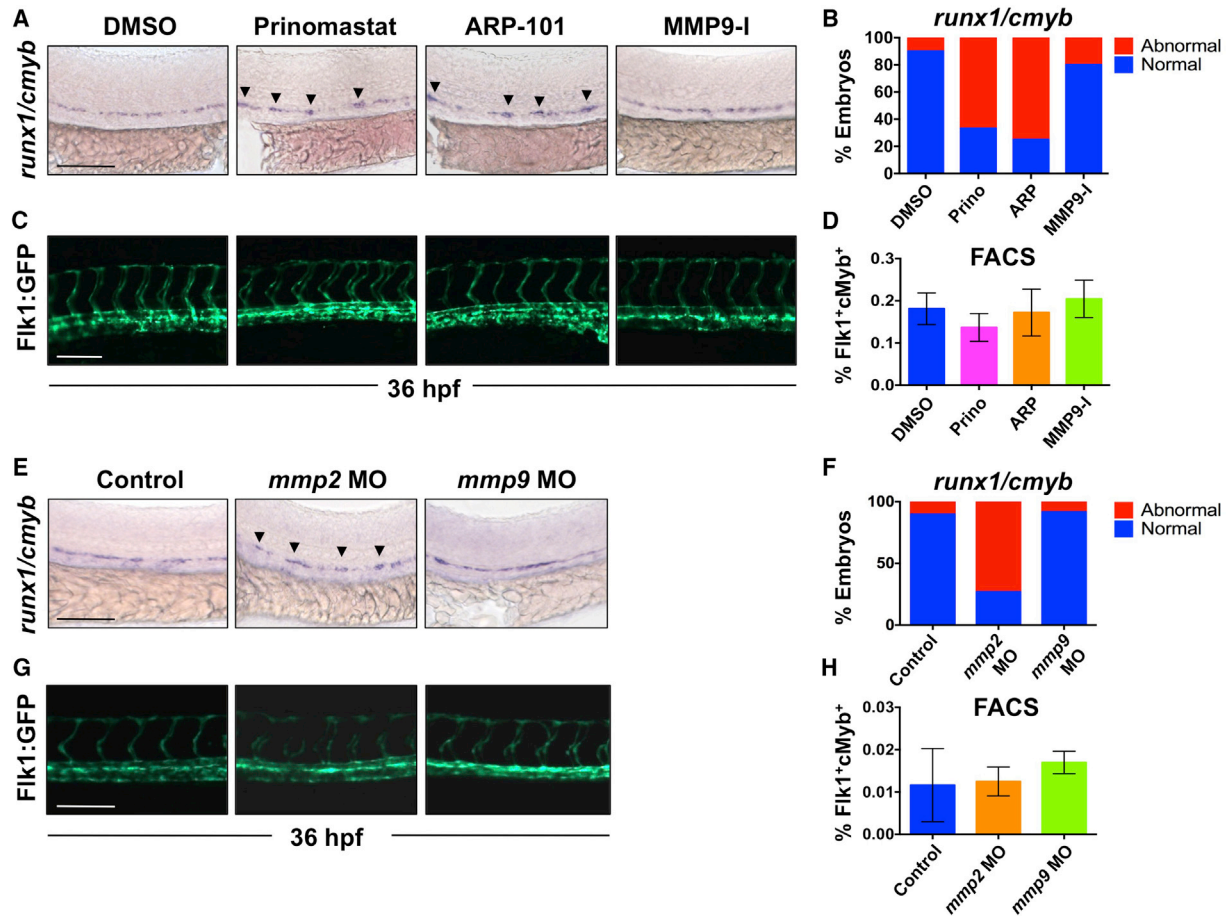

**Figure 2. Inhibition of Mmp2, but Not Mmp9, Function Affects EHT in the VDA**

(A) Exposure to prinomastat (20  $\mu$ M) or ARP-101 (10  $\mu$ M; 12–36 hpf) caused abnormal *runx1/cmyb* patterning in the VDA, while MMP9-I (5  $\mu$ M) had no effect.  
 (B) Qualitative phenotypic distribution of embryos from (A) scored with normal or abnormal *runx1/cmyb* expression ( $n \geq 20$ /condition).  
 (C) In vivo imaging of Flk1:GFP at 36 hpf indicated that MMP inhibitor (12–36 hpf) treatment did not affect physical vasculature structure ( $n \geq 5$  embryos/condition).  
 (D) FACS analysis of double-positive HSPCs in *Tg(kdrl:dsred/cmyb:gfp)* embryos showed no difference in HSPCs after MMP inhibitor exposure (12–36 hpf; 5 embryos/sample,  $\geq 3$  replicates/condition).  
 (E) MO knockdown of *mmp2* or *mmp9* phenocopied effects of chemical inhibition on *runx1/cmyb* WISH at 36 hpf.  
 (F) Phenotypic distribution of embryos from (E) scored for *runx1/cmyb* expression (as in A) in the AGM ( $n$  value as in B).  
 (G) MO knockdown of *mmp2* or *mmp9* had no impact on Flk1:GFP<sup>+</sup> endothelium ( $n$  value as in C).  
 (H) FACS analysis of Flk1:dsRed<sup>+</sup>/cMyb:GFP<sup>+</sup> HSPCs showed no significant difference between *mmp2* or *mmp9* morphants and controls at 36 hpf ( $n$  value as in D).  
 Arrowheads mark HSPC clusters. Error bars denote mean  $\pm$  SD. Scale bars, 100  $\mu$ m.

total Flk1:dsRed<sup>+</sup>/cMyb:GFP<sup>+</sup> HSPC numbers (Figure 2H). Together, these data indicate that gelatinase function is not essential for gross vascular development or specification, but suggest that Mmp2 modifies AGM HSPC emergence.

### Mmp2 Inhibition Leads to Abnormal HSPC Accumulation in the AGM

To further characterize the cellular defect caused by Mmp2 inhibition, we employed several transgenic HSPC reporter

lines. Analysis of *Tg(runx1P2:GFP)* (Lam et al., 2010) embryos following ARP exposure (12–36 hpf) mirrored the WISH results (Figure 3A). Evaluation of a novel HSPC line, *Tg(runx1+23<sup>(144–378)</sup>:egfp)* (referred to hereafter as Runx1+144) (Figures S3A and S3B), which exhibits comparatively higher early AGM fluorescence intensity (Figure S3C) allowing longitudinal evaluation from embryonic specification to adulthood (Figure S3D), likewise showed altered patterning with ARP exposure (Figures 3B and 3C) and no

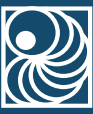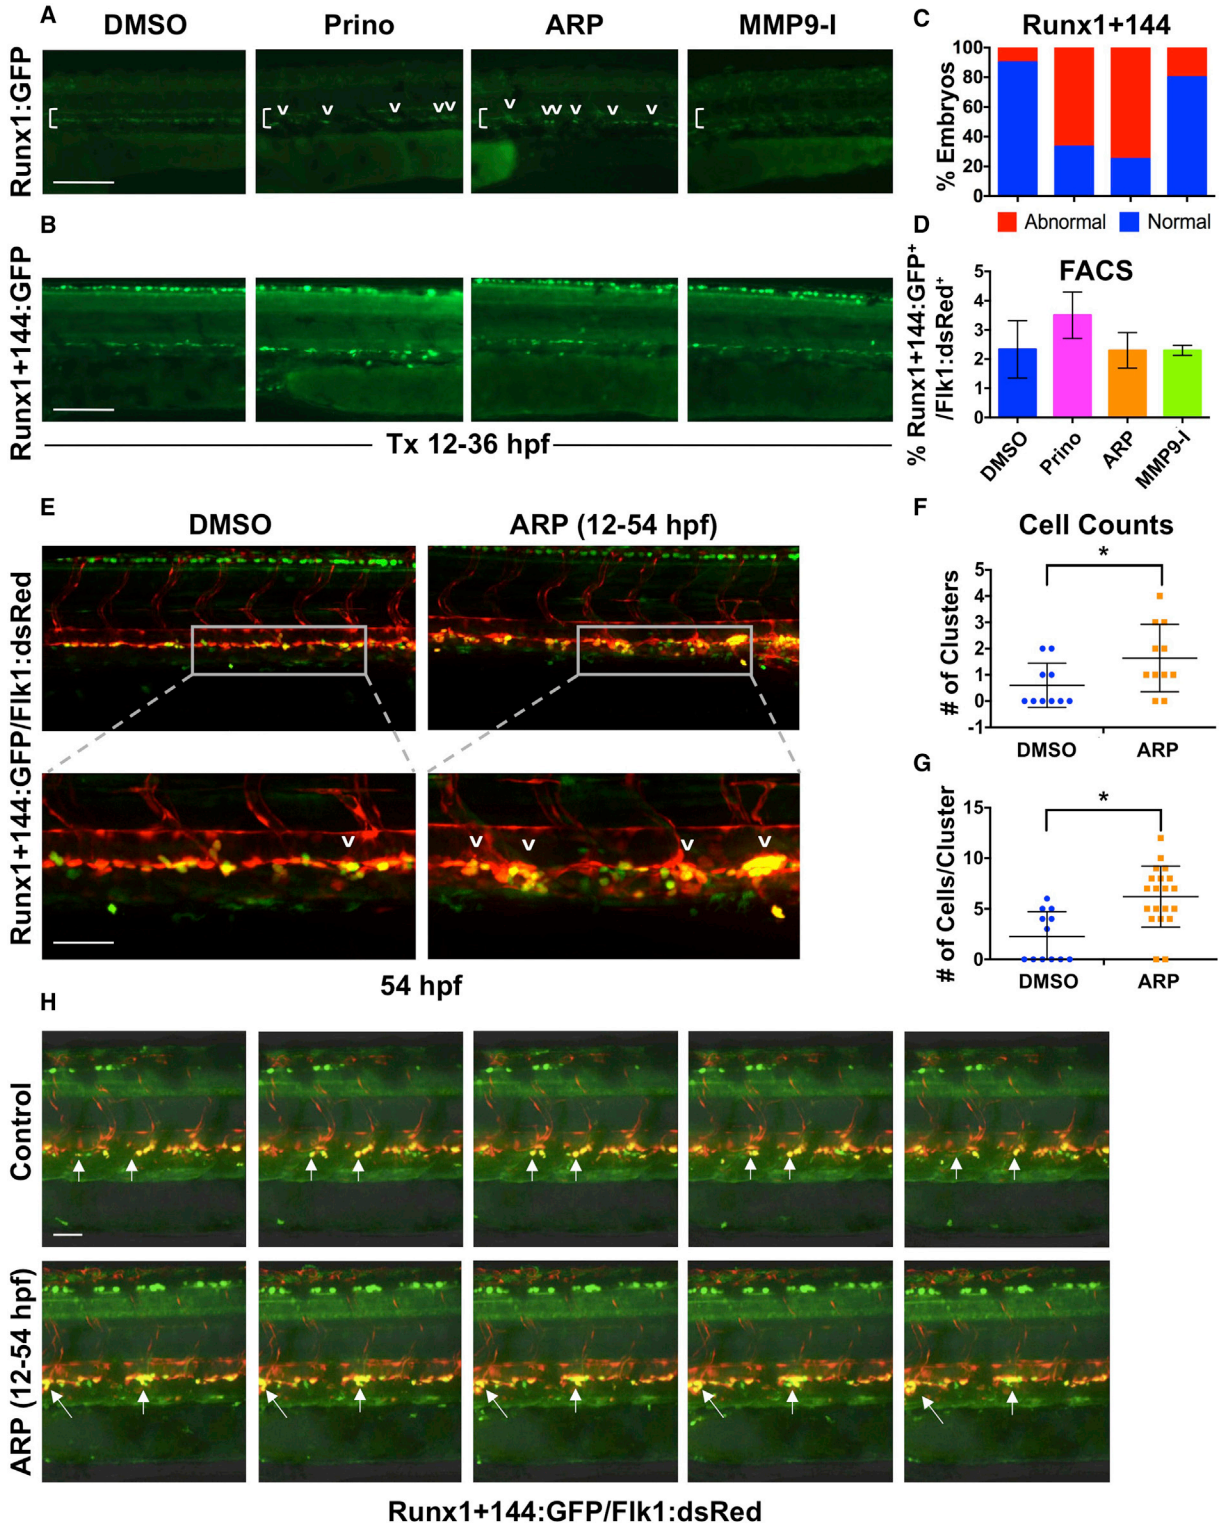

**Figure 3. Mmp2 Inhibition Causes Abnormal HSPC Accumulation in the VDA**

(A) In vivo imaging for Runx1:GFP confirmed altered HSPC development in the VDA with Prinomastat (20  $\mu$ M) and ARP (10  $\mu$ M) (12–36 hpf;  $n \geq 20$  embryos/condition).

(B) In vivo imaging for Runx1+144:GFP phenocopied effects seen in 3A.

(legend continued on next page)

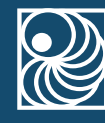

change in total Runx1+144:GFP<sup>+</sup>/Flk1:dsRed<sup>+</sup> HSPCs (Figure 3D). Confocal imaging revealed that Runx1+144<sup>+</sup>/Flk1<sup>+</sup> HSPCs in the VDA at 36 hpf primarily exist as singlets or doublets (Figures 3E and 3F). Occasional aggregates consisting of more than three HSPCs were observed in controls; in contrast, following ARP exposure, a significant increase was observed in both the number of Runx1+144<sup>+</sup>/Flk1<sup>+</sup> aggregates per embryo ( $p < 0.05$ ; Figure 3F) and the total cells in each cluster ( $p < 0.05$ ; Figure 3G).

Time-lapse imaging (42–54 hpf) confirmed that Runx1+144<sup>+</sup> cells were specified, but failed to complete EHT and/or egress from the VDA without Mmp2 activity. Unlike loss of *runx1* (Kissa and Herbolmel, 2010), emerging HSPCs did not “explode” following initiation of EHT; rather, instead of budding, detaching, and immediately entering circulation as seen in controls (Movie S1), in the absence of Mmp2 activity, HSPCs accumulated at discrete intervals throughout the VDA as clusters of increasing size (Movie S2). High magnification of individual clusters from replicate comparisons (Figure 3H) showed newly specified HSPCs actively formed protrusions, but were restricted in their mobility within the subaortic space with loss of Mmp2 function (Movies S3 and S4). To confirm whether expansion of individual clusters was primarily driven by accumulation of HSPCs, we examined proliferation using the cell-cycle reporter line, *Tg(EF1:mAG-zGEM(1/100))* (Sugiyama et al., 2009), crossed to *Tg(kdrl:dsred)*: while Flk1<sup>+</sup> cells in the VDA actively proliferate at 36 hpf, no differences were seen between ARP-treated embryos and controls (Figures S3E and S3F). Together, these findings suggest that with reduced Mmp2 function, HSPCs cannot properly exit the AGM, leading to the formation of expanded hematopoietic clusters.

### HSPC Egress from the VDA Is Inhibited by ECM Accumulation in the Absence of Mmp2

In the adult vasculature, MMP2 proteolytically digests ECM proteins, such as gelatin, collagen, and fibronectin,

to allow cellular movements such as extravasation (Heissig et al., 2003; Parks et al., 2004). Confocal imaging confirmed that large trunk vessels are lined with fibronectin-rich ECM during the window of EHT (Figure 4A). Furthermore, fibronectin<sup>+</sup> ECM was found to envelop rounded cells embedded within the VDA, which could be readily identified as Cd41:GFP<sup>+</sup> HSPCs by 48 hpf (Figure 4B). Given these observations, we sought to determine whether the Mmp2-associated HSPC budding defect was correlated with ECM accumulation in the hemogenic niche. Indeed, ARP exposure (12–36 hpf) resulted in enhanced fibronectin staining in the VDA compared with controls (Figure 4C). Similar results were obtained with the pan-gelatinase inhibitor SB-3CT (32–48 hpf) (Figure S4A). Of note, fibronectin accumulation was particularly evident in the extravascular space between artery and vein, where HSPCs normally enter circulation, as confirmed by cross-section analysis (Figure S4B), consistent with their inability to properly exit the AGM region.

To further investigate whether ECM remodeling by Mmp2 was necessary to complete EHT and then egress from the VDA and intravascular space into circulation, we examined *fibronectin* (*fn1*) mutant zebrafish (Trinh and Stainier, 2004), which lack proper ECM organization. In both wild-type siblings and *fn1*<sup>-/-</sup> mutants, *cmlyb* expression was localized primarily within the CHT by 72 hpf; significantly, whereas Mmp2 inhibition by ARP resulted in maintenance of *cmlyb*<sup>+</sup> HSPCs in the VDA at 72 hpf, this effect was not observed in *fn1*<sup>-/-</sup> embryos (Figures 4D and 4E). Together, these findings imply that Mmp2 promotes remodeling of fibronectin-rich ECM in the VDA to allow HSPC egress from the AGM and subsequent migration to secondary sites of hematopoiesis.

### Mmp2 and Mmp9 Affect HSPC Colonization of Secondary Niches

To explore whether HSPCs exhibit delayed egress from AGM in the absence of Mmp2 activity, we further

(C) Qualitative phenotypic distribution of embryos from (B) scored with normal or abnormal Runx1+144:GFP expression in the VDA at 36 hpf (n value as in A).

(D) FACS analysis of Runx1+144:GFP<sup>+</sup>/Flk1:dsRed<sup>+</sup> HSPCs showed no significant difference with MMP inhibitor exposure (12–36 hpf; 5 embryos/sample,  $\geq 3$  replicates/condition).

(E) Representative confocal images of *Tg(runx1+23<sup>(144–378)</sup>:egfp/kdrl:dsred)* embryos, showing: (top) double-positive HSPC clusters in the VDA with ARP treatment (12–54 hpf) compared with control; (bottom) high magnification of a select cluster (n > 10 embryos/condition).

(F) Absolute counts of Runx1+144<sup>+</sup>/Flk1<sup>+</sup> HSPC clusters (of >3 cells) in the VDA in embryos from (E) showed a significant increase in total clusters after ARP treatment (n > 10 embryos/condition; \* $p < 0.05$ ).

(G) Absolute counts of Runx1+144<sup>+</sup>/Flk1<sup>+</sup> HSPC clusters (of >3 cells) in the VDA in embryos from (E) showed a significant increase in cells per cluster with ARP treatment (n > 10 embryos/condition; \* $p < 0.05$ ).

(H) Still images from the time-lapse analysis (2:45–3:10 min time stamp; see Movies S3 and S4) showed altered budding and egress of Runx1+144<sup>+</sup>Flk1<sup>+</sup> HSPCs in the presence of ARP exposure (12–54 hpf; 2 replicates/condition) compared with controls.

Arrows mark HSPC clusters; brackets mark dorsal/ventral boundaries of the VDA and CV. Error bars denote mean  $\pm$  SD. Scale bars, 100  $\mu$ m (A and B) and 50  $\mu$ m (E and H).

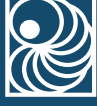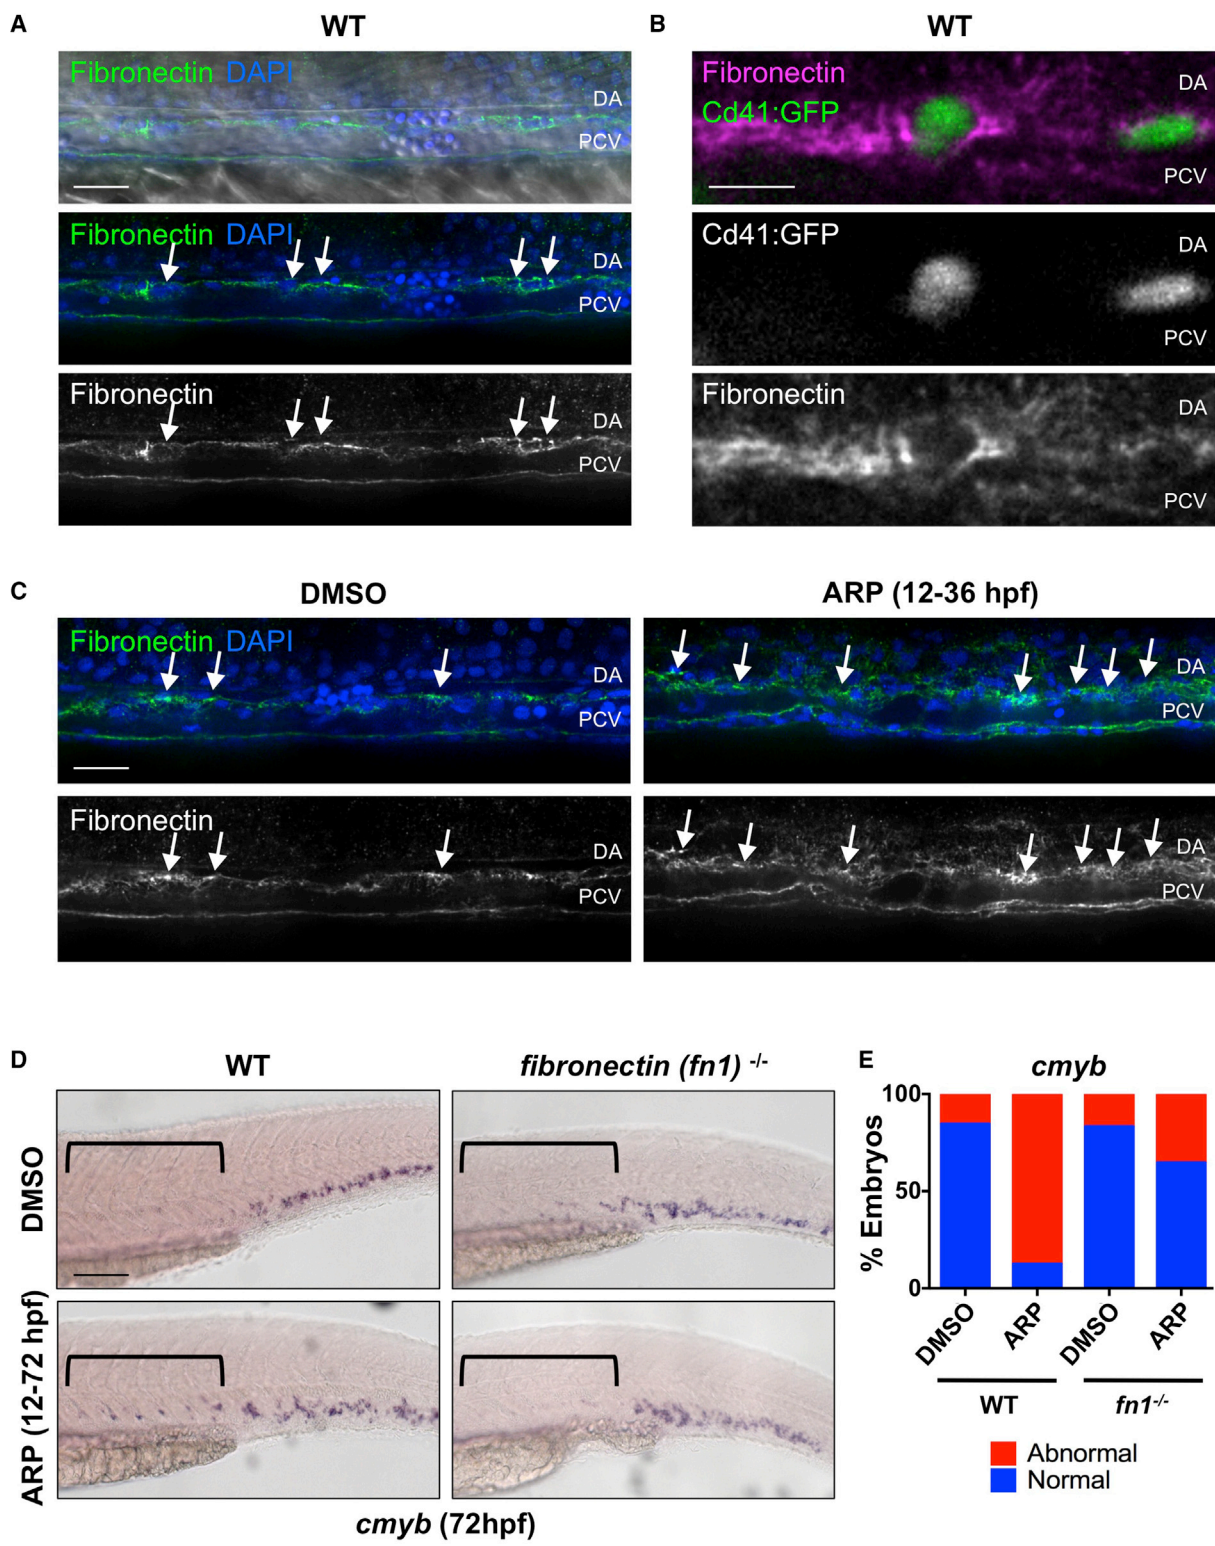

**Figure 4. Mmp2 Facilitates HSPC Budding and Migration via Extracellular Matrix Digestion**  
 (A) Confocal images show fibronectin-rich ECM in the VDA (31 hpf):  $\alpha$ -fibronectin antibody, green; DAPI (nuclei) staining, blue. Arrows point to cells between the dorsal aorta (DA) and posterior cardinal vein (PCV).

(legend continued on next page)



examined colonization of the CHT. In addition to elevated expression of *cmyb* in the VDA by WISH, exposure to ARP (12–72 hpf) caused a concomitant decrease in expression the CHT at 72 hpf (Figures 5A and 5C). This effect was phenocopied by WISH for *cmyb* in both *mmp2* morphants (Figures 5B and 5C) and mutants (Figures S5A and S5B) at 72 hpf (penetrance of retention phenotype in *mmp2*<sup>+/-</sup> in-cross = 28.0%). To further quantify the impact on CHT migration and colonization, we physically separated ARP-treated embryos into trunk versus tail regions, containing AGM and CHT, respectively, using the yolk sac extension (YSE) as a reference point, then used FACS to analyze Flk1:dsRed<sup>+</sup>cMyb:GFP<sup>+</sup> HSPC content. Consistent with the WISH data, *Mmp2* inhibition increased the ratio of HSPCs in anterior (trunk/AGM) versus posterior (tail/CHT) fractions (Figure 5D;  $p < 0.05$ ) compared with controls, implying that *Mmp2* is necessary for HSPCs to transit from the VDA and colonize the CHT.

To clarify whether increased *cmyb* expression in the AGM at 72 hpf reflected delayed HSPC migration or prolonged competence, we examined the effects of *Mmp2* inhibition at an intermediate time point: at 48 hpf, the AGM is still competent to produce HSPCs (Carroll and North, 2014), but seeding of the CHT is actively under way. Compared with wild-type siblings, *cmyb*<sup>+</sup> expression in the VDA was noticeably elevated at 48 hpf in ARP-exposed embryos (Figures S5C and S5D); notably, however, this effect was concurrent with a visible decrease in HSPCs in the CHT compared with controls, indicating that movement of HSPCs from the AGM to the CHT is slowed in the absence *Mmp2* activity. In contrast, neither MMP9-I exposure (12–72 hpf) nor MO-mediated *mmp9* knockdown resulted in a “lagging” HSPC phenotype in the AGM (Figures 5E–5H). Furthermore, as no difference in blood flow, as evaluated by Gata1:dsRed<sup>+</sup> erythrocyte transit in Flk1:GFP<sup>+</sup> vasculature, was noted (Figure S5E), these findings imply that HSPC are actively delayed in migration to the CHT in the absence of normal *Mmp2* function.

To determine whether retention and subsequent colonization defects induced by *Mmp2* inhibition were of lasting impact, we evaluated HSPC-derived lymphoid progenitors in the thymus. WISH analysis following ARP exposure (12–120 hpf) showed decreased expression of *rag1*

compared with controls (Figures 5I–5L); this effect was confirmed as significant by measurement of total *rag1*<sup>+</sup> thymic area ( $p < 0.05$ ; Figure 5K) and quantified by FACS in *Tg(rag2:dsRed)* embryos ( $p < 0.05$ ; Figure 5L). Surprisingly, MMP9-I exposed embryos (12–120 hpf) showed a similar reduction in thymic colonization by WISH, ImageJ, and FACS analysis (Figures 5M–5P). This phenotypic convergence indicates that *Mmp9* may have a role in HSPC development after AGM egress and prior to colonization of adult hematopoietic niches.

### Mmp9 Regulates Vascular Niche Structure and Subsequent HSPC Seeding of the CHT

As *Mmp9* had no role in specification or progression of AGM hematopoiesis, but modified lymphoid progenitor number at later developmental stages, we examined its impact on HSPCs in the CHT. Fluorescent imaging of *Tg(-6.0itga2b:egfp)* embryos after MMP9-I exposure (12–72 hpf) indicated abnormal enrichment of Cd41<sup>+</sup> HSPCs in the CHT compared with controls (Figure S6A). This effect was confirmed by manual cell counts, revealing that *Mmp9* inhibition caused a significant increase in Cd41<sup>+</sup> HSPCs in the CHT at 72 hpf ( $p < 0.05$ ; Figure S6B). In contrast, whole embryo FACS analysis determined that total Cd41:GFP<sup>+</sup>/Gata1:DsRed<sup>-</sup> HSPC number remained unchanged after MMP9-I exposure ( $p = 0.328$ ; Figure S6C), implying that *Mmp9* influences HSPC localization or retention in the CHT.

Comparative WISH analysis from timed exposures to MMP9-I indicated that whether treatment occurred during the full window of HSPC production and colonization (12–72 hpf), or in early (12–36 hpf) versus late (36 hpf+) stages of EHT and CHT migration, each resulted in enhanced *cmyb* CHT expression at 72 hpf (Figures 6A and 6B). Analysis of Runx1+144:GFP expression confirmed enrichment of HSPCs in the CHT at 72 hpf after *Mmp9* inhibition compared with controls, regardless of time of incubation (Figures 6C and 6D). Intriguingly, however, a differential effect of early versus late treatment was noted in regard to HSPC localization within the CHT itself: with early treatment onset (12–72 hpf or 12–36 hpf), HSPCs were enriched in the anterior half of the CHT (blue bar in Figure 6C), closest to the YSE, compared with the posterior end (orange

(B) High-magnification imaging of *Tg(itga2b:gfp)* embryos at 48 hpf shows Cd41:GFP<sup>+</sup> HSPCs embedded in fibronectin-rich ECM between the DA and PCV.

(C) ARP (10  $\mu$ M) treatment (12–36 hpf) increased fibronectin staining in the AGM (right) compared with controls at 36 hpf (left) ( $n \geq 10$  embryos/condition). Arrows mark areas of high fibronectin staining.

(D) ARP exposure (12–72 hpf) caused sustained *cmyb* AGM expression in WT siblings, not in *fibronectin* (*fn1*<sup>-/-</sup>) mutants at 72 hpf. Brackets mark anterior/posterior extent of AGM region.

(E) Qualitative phenotypic distribution of embryos from (D) scored for presence or absence of *cmyb* in the AGM at 72 hpf ( $n \geq 20$ /condition).

WT, wild-type. Scale bars, 20  $\mu$ m (A), 10  $\mu$ m (B), 30  $\mu$ m (C), and 100  $\mu$ m (D).



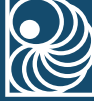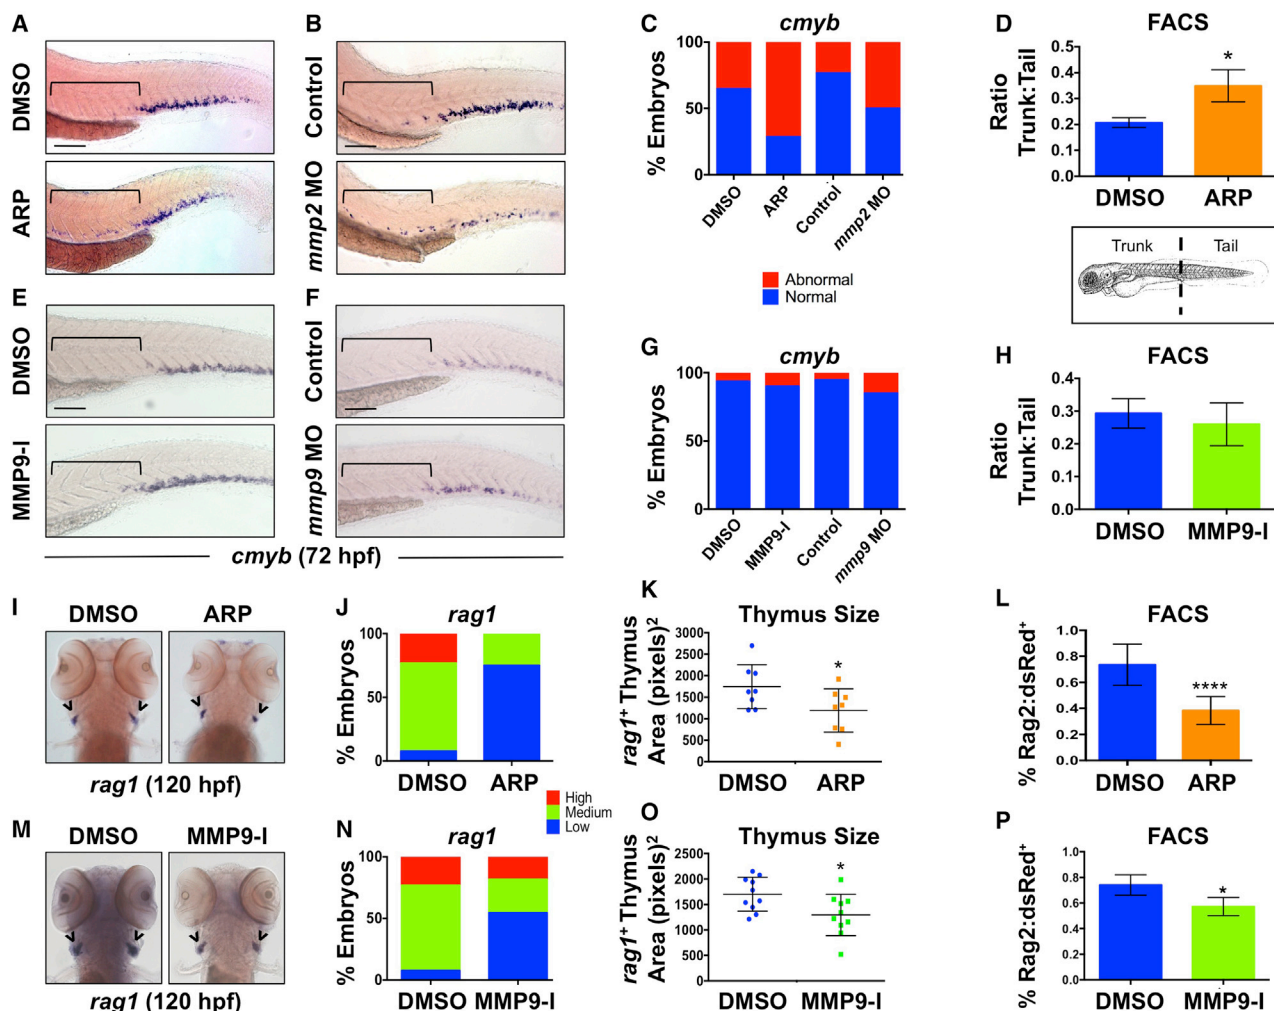

**Figure 5. Gelatinases Play Distinct Roles in HSPC Colonization of the CHT and Thymus**

(A) ARP exposure (12–72 hpf) caused abnormal *cmyb* expression in the AGM. Brackets mark anterior/posterior extent of AGM region. (B) *mmp2* morphants phenocopied the effect shown in (A) at 72 hpf. (C) Qualitative phenotypic distribution of embryos from (A) and (B) scored for abnormal retention of *cmyb*<sup>+</sup> HSPCs in the AGM at 72 hpf (n ≥ 20 embryos/condition). (D) FACS analysis of Flk1:dsRed<sup>+</sup>/*cMyb*:GFP<sup>+</sup> HSPCs showed a significant enrichment in the ratio of trunk to tail HSPCs in ARP-exposed embryos at 72 hpf (10 embryo sections/sample, 5 replicates/condition; \*p < 0.05). (E) MMP9-I exposure (5 μM, 12–72 hpf) did not cause maintenance of *cmyb* AGM expression at 72 hpf. (F) *mmp9* morphants had normal levels of *cmyb* in the AGM at 72 hpf. (G) Qualitative phenotypic distribution of embryos from (E) and (F) scored for *cmyb*<sup>+</sup> HSPCs in the AGM at 72 hpf (n value and scoring as in C). (H) FACS analysis of Flk1:dsRed<sup>+</sup>/*cMyb*:GFP<sup>+</sup> HSPCs showed no change in the trunk-to-tail ratio of HSPCs in MMP9-I-treated embryos at 72 hpf (10 embryo sections/sample, 5 replicates/condition). (I) ARP exposure from 12 to 120 hpf decreased thymic *rag1*<sup>+</sup> expression. (J) Qualitative phenotypic distribution of embryos from (I) scored with low, medium, or high thymic *rag1*<sup>+</sup> expression at 120 hpf (n ≥ 20/condition). (K) ImageJ measurement of *rag1*<sup>+</sup> thymus area revealed a significant decrease in thymus size with *Mmp2* inhibition (12–120 hpf) (n = 8/condition; \*p < 0.05). (L) FACS for *Rag2:dsRed*<sup>+</sup> lymphoid progenitors showed a significant decrease with *Mmp2* inhibition (12–120 hpf) (5 embryos/sample, >3 replicates/condition; \*\*\*\*p < 0.0001). (M) MMP9-I exposure from 12 to 120 hpf decreased thymic *rag1*<sup>+</sup> expression.

(legend continued on next page)

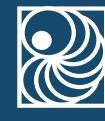

bar in Figure 6C). In contrast, when exposure was initiated at 36 hpf after the onset of EHT and CHT colonization, HSPCs were increased throughout the CHT more uniformly. While no circulation defects were noted, imaging of the tail vasculature revealed that early MMP9-I exposure (12–72 hpf or 12–36 hpf) produced a hypovascular niche (Figure 6E), characterized by fewer fenestrated pockets in the CHT. Abnormal colonization and distribution within the niche with early Mmp9 inhibition was quantified by counts of discrete Cd41:GFP<sup>+</sup> HSPCs and confirmed a significant shift to the anterior (blue) versus posterior (orange) end of the CHT at 72 hpf (Figures S6A and S6D).

We next sought to determine whether increased HSPC numbers within the CHT after Mmp9 inhibition were due to altered proliferative capacity, retention of existing HSPCs, or both. To evaluate proliferation, we processed *Tg(runx1+23<sup>(144–378)</sup>:egfp)* embryos for 5-ethyl-2'-deoxyuridine (EdU) incorporation: MMP9-I exposure (24–72 hpf) increased the appearance of HSPCs in the CHT, as expected; however, no differences were found in relative levels of EdU labeling compared with controls (Figures S6E and S6F). To confirm and further quantify this result, we performed phosphohistone H3 (pH3) analysis: despite increased numbers of Runx1+144<sup>+</sup> HSPCs in the CHT, there was no difference in total pH3<sup>+</sup> cells between control and MMP9-I-treated embryos ( $p = 0.126$ ; Figures S6G and S6H). To test whether the increase of HSPCs in the CHT was instead due to niche retention, we examined embryos at later developmental time points. WISH analysis of the CHT at 96 hpf revealed a sustained increase in *cmlyb*<sup>+</sup> cells following MMP9-I treatment (12–96 hpf) (Figures 6F and 6G); this phenotype was correlated with decreased *cmlyb*<sup>+</sup> HSPCs seeding the thymus, as measured by ImageJ analysis (Figures 6H–6J). Together, these data indicate that Mmp9 exerts a significant time-dependent impact on both CHT vascularity and colonization as well as HSPC migration and retention, which may result from distinct or interdependent regulation.

### Mmp9 Affects Colonization and Retention in the CHT via Cxcl12/Cxcr4 Signaling

C-X-C motif chemokine-12 (CXCL12), also known as stromal cell-derived factor 1 (SDF1), is an inflammatory chemokine that influences cellular behavior via interactions with its receptor CXCR4 (Raz and Mahabaleshwar, 2009).

In adult BM, MMP9 degrades CXCL12 to modulate CXCL12/CXCR4 signaling and influence HSC migration (Jin et al., 2008). In the zebrafish embryo, Cxcl12 overexpression causes hypovascularization of the CHT (Torregroza et al., 2012). As Mmp9 inhibition resulted in a similar hypovascularization phenotype coinciding with abnormal HSPC localization in the CHT, an interaction with Cxcl12/Cxcr4 signaling was examined. Modified epistasis experiments indicated that MO-mediated knockdown of *cxcl12a* caused hypervascularization, consistent with prior reports (Torregroza et al., 2012), and also blocked the negative effect of MMP9-I on CHT structure, as determined by measurements of total vascularized CHT area (Figures 7A and 7D). Significantly, whereas *cxcl12a* knockdown had minimal impact on Runx1+144:GFP<sup>+</sup> HSPC localization (Figures 7A and 7B), MMP9-I exposure-associated accumulation of Runx1+144<sup>+</sup> HSPCs in the CHT at 72 hpf was significantly ameliorated in *cxcl12a* morphants as demonstrated by relative fluorescence intensity analysis (Figure 7C). To further validate this result, *cxcl12a*-deficient embryos (*medusa*) were examined (Valentin et al., 2007). Homozygous mutants were generally unhealthy by 72 hpf, precluding evaluation; however, while no colonization phenotype was seen at baseline in *cxcl12a*<sup>+/-</sup> embryos, reduced Cxcl12 levels partially abrogated the effect of MMP9-I (12–72 hpf) on *cmlyb* expression in the CHT (Figures S7A and S7B).

Increased CXCL12 levels are known to retain cells within tissues, including the BM niche (Raz and Mahabaleshwar, 2009). To correlate developmental accumulation of Cxcl12 with elevated CHT HSPC colonization, we employed *Tg(hsp70l:cxcl12b-egfp)* zebrafish (Li et al., 2005); high sequence homology and similar activities allow Cxcl12a and Cxcl12b to function redundantly when overexpressed (Li et al., 2004). Heat-shock induction of Cxcl12b (24–72 hpf) increased CHT *cmlyb* expression at 72 hpf (Figures 7E and 7F). This effect was correlated with significant reduction in *cmlyb*<sup>+</sup> HSPC localization in the thymus ( $p < 0.05$ ; Figures 7E and 7G), phenocopying the effect of Mmp9 inhibition and supporting a model in which Mmp9 regulates colonization and retention of HSPCs in secondary niches via Cxcl12/Cxcr4 modulation. In sum, our data demonstrate that Mmp2 and Mmp9 play discrete, but essential roles in the developmental production and migration of HSPCs, affecting colonization of adult sites of hematopoiesis.

(N) Qualitative phenotypic distribution of embryos from (M) scored for *rag1* expression in the thymus at 120 hpf (n value and scoring as in J).

(O) ImageJ measurement of *rag1*<sup>+</sup> thymus area revealed a significant decrease in thymus size with Mmp9 inhibition (12–120 hpf) (n = 10/condition; \* $p < 0.05$ ).

(P) FACS for Rag2:dsRed<sup>+</sup> lymphoid progenitors showed a significant decrease with Mmp9 inhibition (12–120 hpf) (5 embryos/sample, >3 replicates/condition; \* $p < 0.05$ ).

Arrowheads in (I and M) mark paired thymii. Error bars denote mean  $\pm$  SD. Scale bars, 100  $\mu$ m.

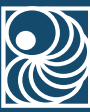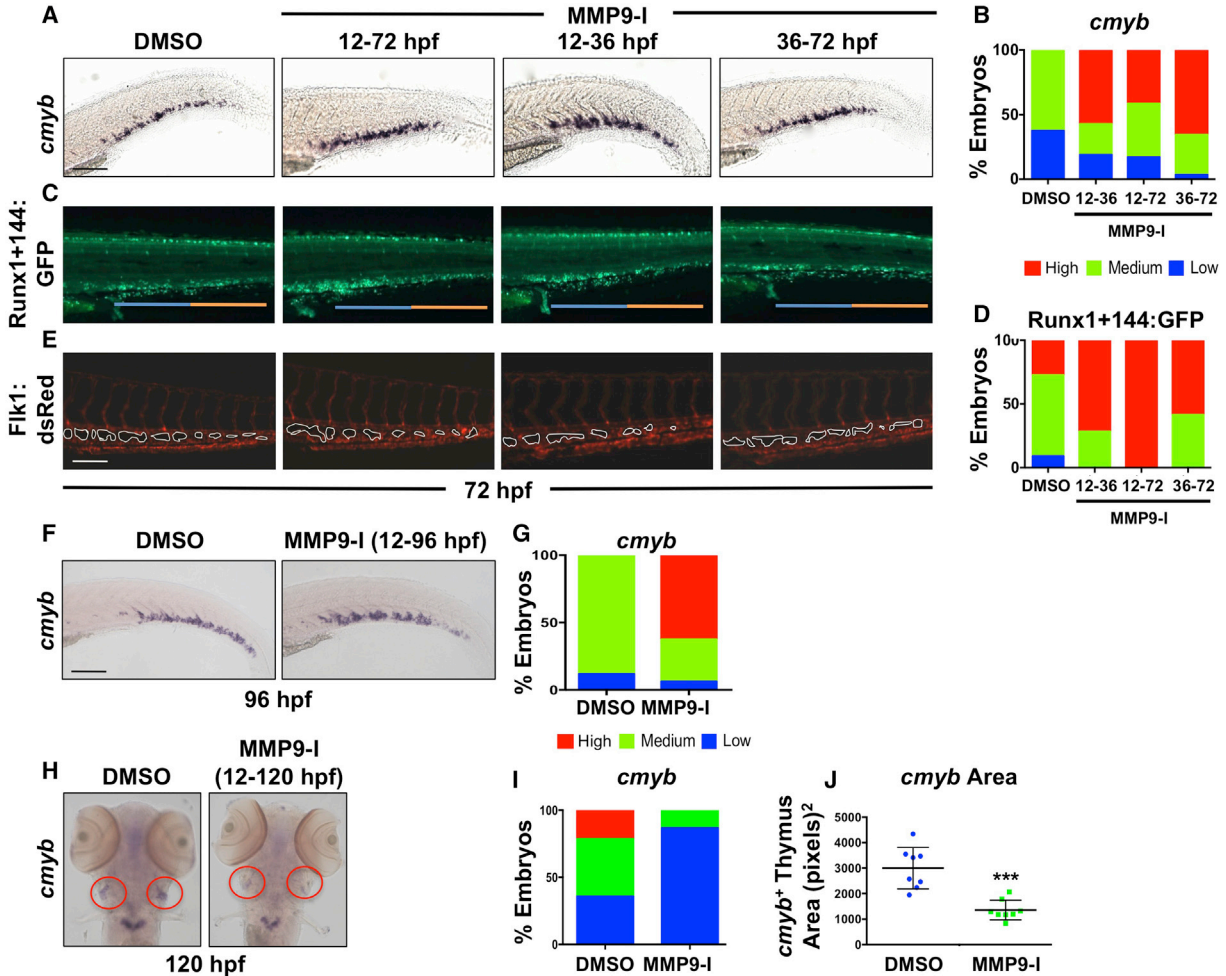

**Figure 6. Mmp9 Inhibition Alters the Structure and Colonization of the CHT Niche**

(A) MMP9-I treatment during discrete intervals (12–72, 12–36, or 36–72 hpf) each increased CHT *cmyb* expression at 72 hpf by WISH compared with controls.  
 (B) Qualitative phenotypic distribution of embryos from (A) scored with low, medium, or high *cmyb* expression in the CHT ( $n \geq 20$ /condition).  
 (C) MMP9-I exposure from 12–72, 12–36, or 36–72 hpf increased appearance of Runx1+144:GFP<sup>+</sup> cells in the CHT; early treatment (12 hpf+) favored seeding of the anterior half of the CHT (blue bar) compared with the posterior (orange bar).  
 (D) Qualitative phenotypic distribution of embryos from (C) scored with low, medium, or high overall Runx1+144:GFP expression in the CHT at 72 hpf ( $n \geq 20$ /condition).  
 (E) In vivo imaging of Flk1:dsRed<sup>+</sup> showed hypovascularization of the CHT after early-onset (12 hpf+) MMP9-I exposure ( $n \geq 10$ /condition), but not with late initiation.  
 (F) MMP9-I treatment (12–96 hpf) retains *cmyb*<sup>+</sup> HSPCs in the CHT ( $n \geq 20$ /condition).  
 (G) Qualitative phenotypic distribution of embryos from (F) scored for *cmyb* expression in the CHT at 96 hpf ( $n$  value and scoring as in A).  
 (H) MMP9-I exposure (12–120 hpf) diminishes *cmyb*<sup>+</sup> HSPC seeding the thymus ( $n \geq 20$ /condition). Circles (red) highlight paired thymii.  
 (I) Qualitative phenotypic distribution of embryos from (H) scored for *cmyb* expression in the thymus at 120 hpf ( $n$  value and scoring as in A).  
 (J) ImageJ analysis showed significant decrease in *cmyb*<sup>+</sup> thymic area after MMP9-I exposure (12–120 hpf; \*\*\* $p < 0.001$ ). Error bars denote mean  $\pm$  SD. Scale bars, 100  $\mu$ m.

## DISCUSSION

In this study, we identified distinct roles for gelatinases Mmp2 and Mmp9 in the regulation of developmental

HSPC production, migration, and niche localization. We demonstrate that during zebrafish development, Mmp2 is required to remodel fibronectin-rich ECM in the VDA to facilitate HSPC egress from the AGM and subsequent

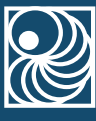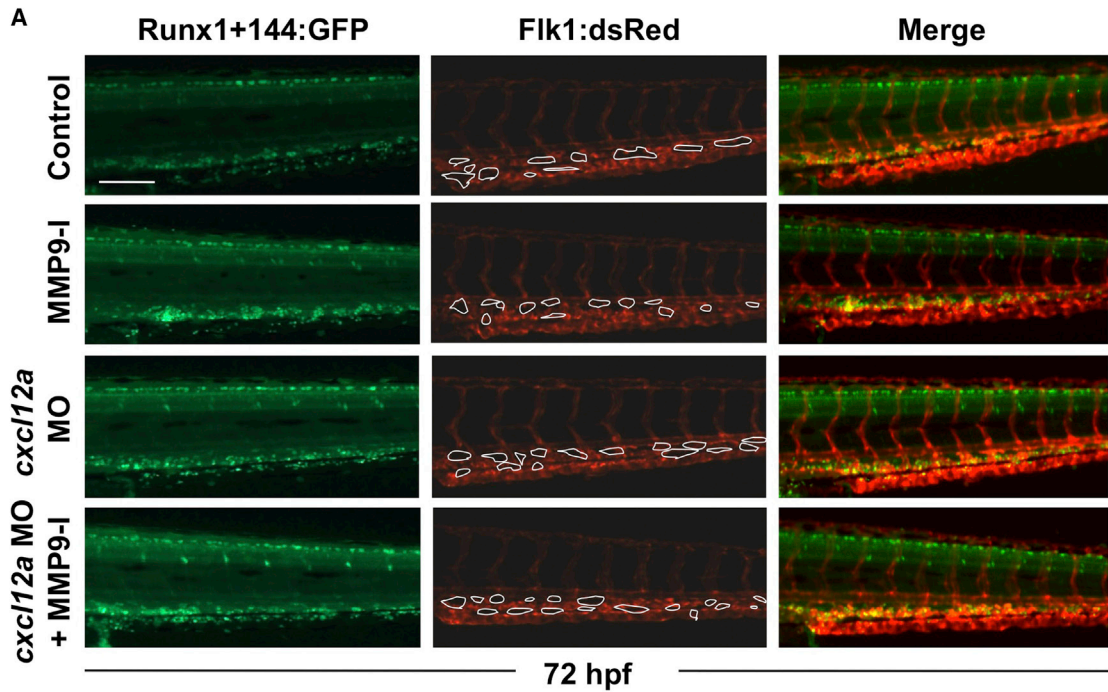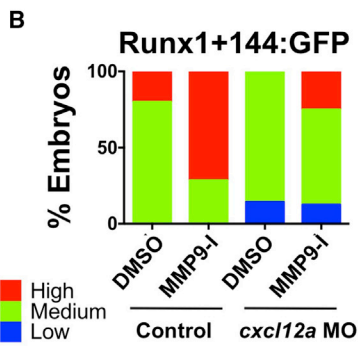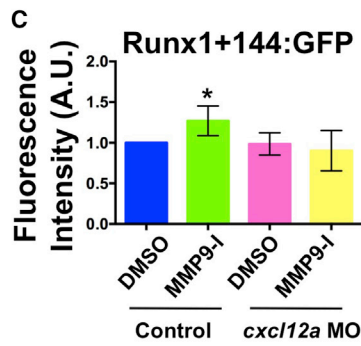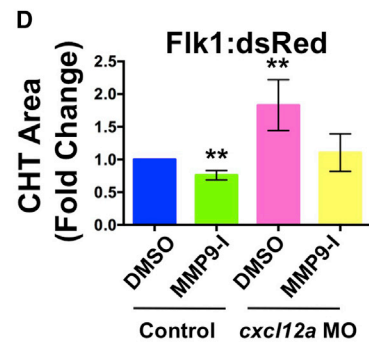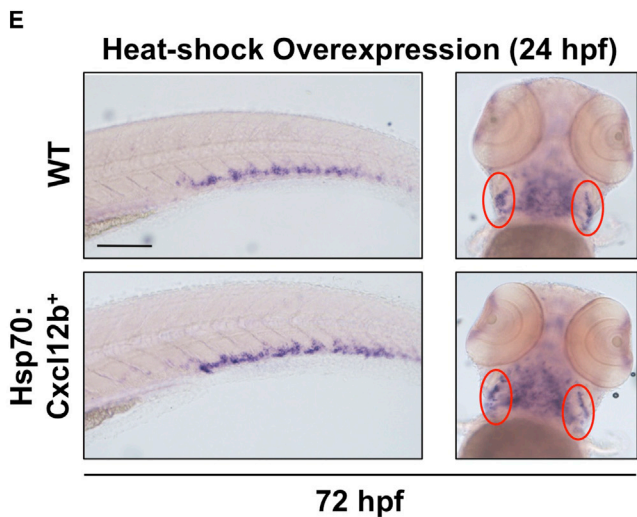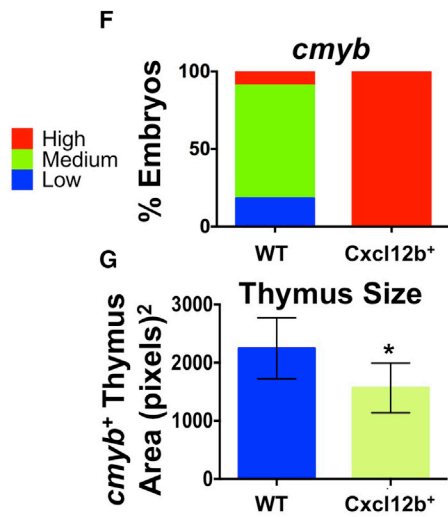

(legend on next page)



migration to the CHT and thymus. In addition, we elucidate interrelated effects of *Mmp9* on hematopoiesis in the CHT: via modulation of *Cxcl12* activity, *Mmp9* affects the structure of the vascular niche, altering HSPC localization, and promotes HSPC migration to subsequent hematopoietic niches. ECM restructuring by MMPs affects development of lungs, mammary glands, and salivary glands (Bonnans et al., 2014). Likewise, a role for MMPs in ECM remodeling and subsequent maturation occurs in the developing intestine of tadpoles (Ishizuya-Oka et al., 2000), while MMP2 in particular is required for local ECM digestion during epithelial branching (Bonnans et al., 2014). Our study reveals essential but discrete roles for *Mmp2* and *Mmp9* downstream of sterile inflammatory signaling during embryonic hematopoiesis, whereby each can affect HSPC migration and localization in subsequent developmental niches.

As a group, MMPs are multifunctional enzymes closely regulated by a variety of upstream signaling pathways (Parks et al., 2004). Our work specifically demonstrates a relationship between inflammatory signaling in the embryo and expression of *mmp2* and *mmp9*. Induction of these enzymes by both endogenous and exogenous  $\text{PGE}_2$  provides further insight into the mechanisms underlying the recently described effects of inflammatory signaling on hematopoiesis (Espín-Palazón et al., 2014; He et al., 2015; Li et al., 2014; Sawamiphak et al., 2014) and suggests targets for therapeutic intervention to modulate HSPC production. Our findings, taken together with these studies, suggest that *Mmp2* may be constitutively expressed downstream of endogenous signaling pathways active in the AGM, while *Mmp9* is the inducible enzyme transcribed in response to external stimuli, such as inflammation, to aid HSPC expansion and/or movement in the embryo.

While our evidence points to *Cxcl12* as the main modulator of embryonic HSPC localization in the CHT, the induction of *Mmp2/9* by  $\text{PGE}_2$  and its potential downstream proteolytic activity imply that *Mmp9* function during

developmental hematopoiesis may affect inflammatory signaling on a larger scale. MMP2/9 are known to activate transforming growth factor  $\beta$ , a critical cytokine involved with HSPC regulation (Vaidya and Kale, 2015). Furthermore, gelatinases can work together with other MMPs to modulate cytokine gradients: for example, combinatorial MMP2/9, MMP1, and MMP3 inactivate interleukin-1 $\beta$  (Ito et al., 1996). Given this cooperativity, it will be interesting to investigate the relationships between MMP2/9 and the inflammatory mediators recently shown to regulate embryonic hematopoiesis.

Our findings directly interface with the role of CXCL12 (SDF1)/CXCR4 signaling in adult HSPC migration: CXCL12 levels increase in response to stress and inflammation, and influence HSPC mobilization and extravasation within the adult BM (Dar et al., 2006). As hematopoietic niches are hypoxic during HSPC specification, budding, and migration and recently shown to be under inflammatory regulation, our discovery that *Mmp9*-mediated modulation of *Cxcl12* signaling is necessary to ensure proper HSPC maturation in the embryo illustrates functional parallels between embryonic and adult niches, despite differing cellular components. The CXCL12/CXCR4 axis has previously been therapeutically exploited to improve HSC transplantation: the CXCR4 inhibitor plerixafor (AMD3100), which prevents CXCL12 binding, is administered before BM donation to increase HSPC mobilization (Dar et al., 2006). The HSPC mobilizing agent Me6Tren also promotes HSPC migration by inducing MMP9, leading to disruption of CXCL12/CXCR4 signaling (Zhang et al., 2013). This shows the therapeutic relevance of our characterization of the relationship between chemokine signaling, MMP9, and HSPC migration, and raises the possibility that administration of CXCL12/CXCR4 modulators with known inducers of HSPC specification and expansion, such as  $\text{PGE}_2$ , may ensure that HSPCs can correctly home to and seed the recipient BM niche.

### Figure 7. *Mmp9* Affects HSPC CHT Homeostasis via Regulation of *Cxcl12* Signaling

(A) Knockdown of *cxcl12a* in *Runx1+144:GFP<sup>+</sup>/Flk1:dsRed<sup>+</sup>* embryos blocked the effect of MMP9-I exposure (12–72 hpf) on *Runx1+144:GFP* localization (left); MMP9-I-associated hypovascularity was also antagonized ( $n \geq 10$ /condition; center). Merged images are on the right. (B) Qualitative phenotypic distribution of embryos from (A) scored with low, medium, or high *Runx1+144:GFP* expression in the CHT at 72 hpf ( $n \geq 10$ /condition). (C) ImageJ analysis revealed a significant increase in *Runx1+144:GFP* fluorescence intensity in the CHT with MMP9-I exposure alone (mean  $\pm$  SEM; two-tailed t test;  $*p < 0.05$ ;  $n \geq 10$ /condition), but not in *cxcl12a* morphants. (D) ImageJ analysis of *Flk1:dsRed* at 72 hpf indicated that a significant decrease in vascularized CHT plexus area from MMP9-I exposure (mean of quadruplicate experiments  $\pm$  SEM; two-tailed t test;  $**p < 0.01$ ;  $n \geq 10$ /condition) was alleviated in *cxcl12a* morphants. (E) Heat-shock (37°C, 30 min at 24 hpf) overexpression of *Cxcl12b* enhanced *cmvb* expression in the CHT (left) but decreased thymic staining (right) at 72 hpf. Ovals (red) highlight paired thymii. (F) Qualitative phenotypic distribution of embryos from (E) scored for *cmvb* expression in the CHT at 72 hpf ( $n$  value and scoring as in B). (G) ImageJ analysis showed decreased *cmvb<sup>+</sup>* thymic area at 72 hpf after *Cxcl12b* overexpression (37°C, 30 min at 24 hpf;  $*p < 0.05$ ). WT, wild-type. Error bars denote mean  $\pm$  SD. Scale bars, 100  $\mu\text{m}$ .



Taken together, our data and the previously described roles of MMP2 and MMP9 in tissue remodeling (Giannandrea and Parks, 2014), cytokine regulation (Parks et al., 2004), and cell migration/localization (Zhang et al., 2013) suggest a model whereby these enzymes provide HSPCs with physical “permission” to leave the niches and move to other hematopoietic sites, likely affecting their maturation, expansion, or function. The wide variety of substrates cleaved by MMPs and their expression throughout embryonic development and in the adult suggests that MMP2 and MMP9 are part of a larger mechanism by which the niche provides instructive cues affecting organ development and homeostasis. Further understanding of the intersections between inflammatory signaling, ECM remodeling, and hematopoiesis could be exploited to improve in vitro and in vivo HSPC expansion efforts, as well as HSC mobilization and transplantation. Here, we find that via a combination of direct and indirect mechanisms, including ECM degradation and regulation of chemokine activity, *Mmp2* and *Mmp9* work to maintain HSPC equilibrium within embryonic hematopoietic niches. This work furthers our understanding of the biophysical details underlying embryonic HSPC production and function in vivo.

## EXPERIMENTAL PROCEDURES

### Zebrafish Husbandry

Zebrafish were maintained in accordance with the Beth Israel Deaconess Medical Center and Boston Children’s Hospital Institutional Animal Care and Use Committee protocols. Transgenic and mutant lines utilized are described in [Supplemental Experimental Procedures](#). *Tg(hsp70:cxcl12b-egfp)* expression was induced by incubation at 37°C for 30 min.

### Targeted Cell Ablation

Transgenic embryos expressing NTR exclusively in macrophages (*mpeg1:gal4;uas:nfsb-mcherry*) or neutrophils (*mpx:gal4;uas:nfsb-mcherry*) were treated with 10–12.5 mM Mtz (24–48 hpf) and fixed for WISH. As controls, transgene negative sibling embryos from the same clutch were treated with Mtz.

### Chemical Exposures and WISH

Zebrafish embryos were exposed to chemical modulators in E3 fish medium in multi-well plates (see [Supplemental Experimental Procedures](#) for detailed information). Embryos were analyzed by WISH using published probes to *runx1*, *cmyb*, *ephrinb2*, *mmp2*, *mmp9*, and *rag1*, and established methods (<https://zfin.org/ZFIN/Methods/ThisseProtocol.html>). Images were acquired on a Zeiss Axio Imager A1 or Zeiss Discovery V8 with Axiovision LE software. WISH data were qualitatively analyzed ( $\geq 10$  embryos/condition,  $\geq 3$  independent experiments) and graphically depicted as the percentage exhibiting normal versus abnormal, or high/medium/low expression compared with median profile of sibling controls.

### MO Injections

MOs (Gene Tools; sequences in [Supplemental Experimental Procedures](#)) were injected at the 1-cell stage, as previously described (Cortes et al., 2016); effects were scored in comparison with matched sibling controls.

### Embryo Dissociation, FACS Analysis, and Sorting

For FACS analysis, fluorescent embryos (five embryos per sample, four replicates per condition) were pooled, incubated for 1–1.5 hr at 37°C in 0.5 mg/mL Liberase (Roche), and manually dissociated. Cells were filtered through 40- $\mu$ m mesh, washed in PBS, resuspended in 1 $\times$  PBS, and treated with 5 nM SYTOX Red (Life Technologies) before analysis on a BD Biosciences FACSCanto II. Non-transgenic and single-color sibling controls were used for FACS gating. Data were processed using FlowJo X software (Tree Star), and statistics (two-tailed Student’s t test) were run in Prism 6 (GraphPad). For FACS sorting, 1,000 embryos/condition (three replicates) were dissociated and fractionated into double-negative, Flk1<sup>+</sup>/cMyb<sup>-</sup>, and Flk1<sup>-</sup>/cMyb<sup>+</sup> populations on a BD SORP FACS Aria.

### qPCR Analysis

RNA (20 pooled embryos/condition or FACS-sorted populations) was purified with an RNAqueous Total RNA isolation kit, treated with DNase-I, and used to generate cDNA using Superscript III First Strand Synthesis Supermix (Life Technologies). qRT-PCR was performed with SYBR Green PCR Master Mix (Life Technologies) on a Bio-Rad CFX384. Samples were run in triplicate with at least two biological replicate pools per condition (for primers, see [Supplemental Experimental Procedures](#)). RT-PCR Miner (<http://ewindup.info/miner>) was used for statistical analysis.

### Immunohistochemistry

Immunohistochemistry utilized standard procedures and available antibodies (see [Supplemental Experimental Procedures](#)). Embryos, embedded in 4% agarose, were cut into 100- $\mu$ m sections with a Microm HM650V vibratome (Thermo Scientific) before staining.

### Confocal Microscopy and Image Analysis

Imaging was conducted using an inverted PerkinElmer Ultraview Vox or Nikon Eclipse Ti spinning disk confocal. For time-lapse microscopy (42–54 hpf), *Runx1+144:GFP<sup>+</sup>/Flk1:dsRed<sup>+</sup>* embryos were embedded in 0.8%–2% low-melting agarose with tricaine (Sigma) and mounted on 35-mm center-glass dishes. Image analysis was performed using ImageJ (NIH), Volocity (PerkinElmer), or Imaris (Bitplane) software.

### Cell Proliferation and Apoptosis Analysis

*Runx1+144:GFP<sup>+</sup>* embryos were incubated at 72 hpf on ice for 10 min, followed by a 2-hr incubation in 400  $\mu$ M EdU (4% DMSO/E3 buffer) at 28°C. Embryos were washed and fixed overnight in 4% paraformaldehyde, followed by GFP immunodetection (Millipore; 1:200). EdU labeling was performed (room temperature, 45 min) with the Click-IT Plus EdU Alexa Fluor

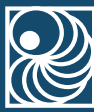

647 kit (Thermo Fisher) and pH3 immunostaining, as described above (1:200; Millipore). Cell death was detected by incubation (30 min) in acridine orange (5 µg/mL; Molecular Probes) in E3 embryo medium before mounting.

### RNA-Seq

Double-positive *Tg(mpeg1:mcherry;mpx:egfp)* embryos (~1,000) were isolated at 72 hpf, dissociated to single cells, and FACS sorted to collect >50,000 cells/population: Mpeg1:mCherry<sup>+</sup>, Mpx:EGFP<sup>+</sup>, and double-negative (remainder of the embryo). Total RNA was isolated using TRIzol LS and GenElute LPA carrier as per manufacturer's instructions. Libraries were prepared from 50 ng of total RNA/sample as input using Ribogone (Clontech) and SMARTer Universal Low Input RNA Kit (Clontech). Sequencing was done on an Illumina HiSeq 2500.

### ACCESSION NUMBERS

The dataset is available at GEO: GSE93818.

### SUPPLEMENTAL INFORMATION

Supplemental Information includes Supplemental Experimental Procedures, seven figures, and four movies and can be found with this article online at <http://dx.doi.org/10.1016/j.stemcr.2017.03.016>.

### AUTHOR CONTRIBUTIONS

L.N.T., E.J.H., M.C., K.N., and S.Y.L. performed embryo exposures, MO injections, WISH, and fluorescence microscopy. L.N.T. and M.C. and E.J.H. conducted FACS. L.N.T. performed qPCR. E.J.H. and S.Y. analyzed RNA-seq data. E.J.H., M.L.D., M.C., S.Y.L., and J.R.P. performed immunohistochemistry and confocal microscopy. L.N.T., E.J.H., M.C., L.I.Z., and T.E.N. designed experiments, evaluated results, prepared figures and edited the manuscript. L.N.T. and T.E.N. drafted and revised the text. All authors reviewed the manuscript.

### ACKNOWLEDGMENTS

We thank: J. Gross for *fn1* mutants, S. Schulte-Merker for *mmp2* mutants, and G. Lieschke and S. Renshaw for the *mpeg1* and *mpx:gal4* lines, respectively. FACS sorting was conducted at the BIDMC/HSCI and BCH FACS cores. Confocal microscopy was done at the BCH Cellular Imaging core. This work was supported by NIH R01DK098241-01A1 (T.E.N.), R01DK098241-03S1 (T.E.N., M.C.), R01 HL04880, R01 DK53298, PO1 HL32262, P30 DK49216, U01 HL10001 and R24 DK092760 (L.I.Z.), and 1F31HL132410-01A1 (L.N.T.). E.J.H. is an HHMI Fellow of the Helen Hay Whitney Foundation. L.I.Z. is supported by the HHMI and a founder and stockholder of Fate Therapeutics, Marauder Therapeutics, and Scholar Rock.

Received: July 1, 2016

Revised: March 14, 2017

Accepted: March 14, 2017

Published: April 13, 2017

### REFERENCES

- Bertrand, J.Y., Chi, N.C., Santoso, B., Teng, S., Stainier, D.Y.R., and Traver, D. (2010). Haematopoietic stem cells derive directly from aortic endothelium during development. *Nature* 464, 108–111.
- Bonnans, C., Chou, J., and Werb, Z. (2014). Remodelling the extracellular matrix in development and disease. *Nat. Rev. Mol. Cell Biol.* 15, 786–801.
- Carroll, K.J., and North, T.E. (2014). Oceans of opportunity: exploring vertebrate hematopoiesis in zebrafish. *Exp. Hematol.* 42, 684–696.
- Chen, M.J., Yokomizo, T., Zeigler, B.M., Dzierzak, E., and Speck, N.A. (2009). Runx1 is required for the endothelial to haematopoietic cell transition but not thereafter. *Nature* 457, 887–891.
- Cortes, M., Chen, M.J., Stachura, D.L., Liu, S.Y., Kwan, W., Wright, F., Vo, L.T., Theodore, L.N., Esain, V., Frost, I.M., et al. (2016). Developmental vitamin D availability impacts hematopoietic stem cell production. *Cell Rep.* 17, 458–468.
- Curado, S., Stainier, D.Y.R., and Anderson, R.M. (2008). Nitroreductase-mediated cell/tissue ablation in zebrafish: a spatially and temporally controlled ablation method with applications in developmental and regeneration studies. *Nat. Protoc.* 3, 948–954.
- Dar, A., Kollet, O., and Lapidot, T. (2006). Mutual, reciprocal SDF-1/CXCR4 interactions between hematopoietic and bone marrow stromal cells regulate human stem cell migration and development in NOD/SCID chimeric mice. *Exp. Hematol.* 34, 967–975.
- Davis, G.E., and Senger, D.R. (2005). Endothelial extracellular matrix: biosynthesis, remodeling, and functions during vascular morphogenesis and neovessel stabilization. *Circ. Res.* 97, 1093–1107.
- Detry, B., Ercicum, C., Paupert, J., Blacher, S., Maillard, C., Bruyère, F., Pendeville, H., Remacle, T., Lambert, V., Balsat, C., et al. (2012). Matrix metalloproteinase-2 governs lymphatic vessel formation as an interstitial collagenase. *Blood* 119, 5048–5056.
- Dzierzak, E., and Speck, N.A. (2008). Of lineage and legacy: the development of mammalian hematopoietic stem cells. *Nat. Immunol.* 9, 129–136.
- Esain, V., Kwan, W., Carroll, K.J., Cortes, M., Liu, S.Y., Frechette, G.M., Vedder-Sheward, L.M., Nissim, S., Goessling, W., and North, T.E. (2015). Cannabinoid receptor-2 regulates embryonic hematopoietic stem cell development via PGE2 and P-selectin activity. *Stem Cells* 33, 2596–2612.
- Espín-Palazón, R., Stachura, D.L., Campbell, C.A., García-Moreno, D., Del Cid, N., Kim, A.D., Candel, S., Meseguer, J., Mulero, V., and Traver, D. (2014). Proinflammatory signaling regulates hematopoietic stem cell emergence. *Cell* 159, 1070–1085.
- Funahashi, Y., Shawber, C.J., Sharma, A., Kanamaru, E., Choi, Y.K., and Kitajewski, J. (2011). Notch modulates VEGF action in endothelial cells by inducing Matrix Metalloprotease activity. *Vasc. Cell* 3, 2.
- Giannandrea, M., and Parks, W.C. (2014). Diverse functions of matrix metalloproteinases during fibrosis. *Dis. Model. Mech.* 7, 193–203.
- Goessling, W., North, T.E., Loewer, S., Lord, A.M., Lee, S., Stoick-Cooper, C.L., Weidinger, G., Puder, M., Daley, G.Q., Moon, R.T.,



- et al. (2009). Genetic interaction of PGE2 and Wnt signaling regulates developmental specification of stem cells and regeneration. *Cell* 136, 1136–1147.
- Goessling, W., Allen, R.S., Guan, X., Jin, P., Uchida, N., Dovey, M., Harris, J.M., Metzger, M.E., Bonifacino, A.C., Stroncek, D., et al. (2011). Prostaglandin E2 enhances human cord blood stem cell xenotransplants and shows long-term safety in preclinical nonhuman primate transplant models. *Cell Stem Cell* 8, 445–458.
- He, Q., Zhang, C., Wang, L., Zhang, P., Ma, D., Ly, J., and Liu, F. (2015). Inflammatory signaling regulates hematopoietic stem and progenitor cell emergence in vertebrates. *Blood* 125, 1098–1106.
- Heissig, B., Hattori, K., Friedrich, M., Rafii, S., and Werb, Z. (2003). Angiogenesis: vascular remodeling of the extracellular matrix involves metalloproteinases. *Curr. Opin. Hematol.* 10, 136–141.
- Ishizuya-Oka, A., Li, Q., Amano, T., Damjanovski, S., Ueda, S., and Shi, Y.B. (2000). Requirement for matrix metalloproteinase stromelysin-3 in cell migration and apoptosis during tissue remodeling in *Xenopus laevis*. *J. Cell Biol.* 150, 1177–1188.
- Ito, A., Mukaiyama, A., Itoh, Y., Nagase, H., Thogersen, I.B., Enghild, J.J., Sasaguri, Y., and Mori, Y. (1996). Degradation of interleukin 1-beta by matrix metalloproteinases. *J. Biol. Chem.* 271, 14657–14660.
- Jin, F., Zhai, Q., Qiu, L., Meng, H., Zou, D., Wang, Y., Li, Q., Yu, Z., Han, J., Li, Q., et al. (2008). Degradation of BM SDF-1 by MMP-9: the role in G-CSF-induced hematopoietic stem/progenitor cell mobilization. *Bone Marrow Transpl.* 42, 581–588.
- Kissa, K., and Herbomel, P. (2010). Blood stem cells emerge from aortic endothelium by a novel type of cell transition. *Nature* 464, 112–115.
- Lam, E.Y.N., Hall, C.J., Crosier, P.S., Crosier, K.E., and Flores, M.V. (2010). Live imaging of Runx1 expression in the dorsal aorta tracks the emergence of blood progenitors from endothelial cells. *Blood* 116, 909–914.
- Li, Q., Shirabe, K., and Kuwada, J.Y. (2004). Chemokine signaling regulates sensory cell migration in zebrafish. *Dev. Biol.* 269, 123–136.
- Li, Q., Shirabe, K., Thisse, C., Thisse, B., Okamoto, H., Masai, I., and Kuwada, J.Y. (2005). Chemokine signaling guides axons within the retina in zebrafish. *J. Neurosci.* 25, 1711–1717.
- Li, Y., Esain, V., Teng, L., Xu, J., Kwan, W., Frost, I.M., Yzaguirre, A.D., Cai, X., Cortes, M., Maijenburg, M.W., et al. (2014). Inflammatory signaling regulates embryonic hematopoietic stem and progenitor cell production. *Genes Dev.* 28, 2597–2612.
- Marshall, C.J., Moore, R.L., Thorogood, P., Brickell, P.M., Kinnon, C., and Thrasher, A.J. (1999). Detailed characterization of the human aorta-gonad-mesonephros region reveals morphological polarity resembling a hematopoietic stromal layer. *Dev. Dyn.* 215, 139–147.
- North, T.E., Gu, T.-L., Stacy, T., Wang, Q., Howard, L., Binder, M., Marin-Padilla, M., and Speck, N.A. (1999). *Cbfa2* is required for the formation of intra-aortic hematopoietic clusters. *Development* 126, 2563–2575.
- North, T.E., Goessling, W., Walkley, C.R., Lengerke, C., Kopani, K.R., Lord, A.M., Weber, G.J., Bowman, T.V., Jang, I.-H., Gresser, T., et al. (2007). Prostaglandin E2 regulates vertebrate haematopoietic stem cell homeostasis. *Nature* 447, 1007–1011.
- Parks, W.C., Wilson, C.L., and López-Boado, Y.S. (2004). Matrix metalloproteinases as modulators of inflammation and innate immunity. *Nat. Rev. Immunol.* 4, 617–629.
- Raz, E., and Mahabaleshwar, H. (2009). Chemokine signaling in embryonic cell migration: a fish-eye view. *Development* 136, 1223–1229.
- Rozario, T., and DeSimone, D.W. (2010). The extracellular matrix in development and morphogenesis: a dynamic view. *Dev. Biol.* 341, 126–140.
- Sawamiphak, S., Kontarakis, Z., and Stainier, D.Y.R. (2014). Interferon gamma signaling positively regulates hematopoietic stem cell emergence. *Dev. Cell* 31, 640–653.
- Sugiyama, M., Sakaue-Sawano, A., Imura, T., Fukami, K., Kitaguchi, T., Kawakami, K., Okamoto, H., Higashijima, S.-I., and Miyawaki, A. (2009). Illuminating cell-cycle progression in the developing zebrafish embryo. *Proc. Natl. Acad. Sci. USA* 106, 20812–20817.
- Torregroza, I., Holtzinger, A., Mendelson, K., Liu, T.-C., Hla, T., and Evans, T. (2012). Regulation of a vascular plexus by *gata4* is mediated in zebrafish through the chemokine *sdf1a*. *PLoS One* 7, e46844–13.
- Travnickova, J., Tran Chau, V., Julien, E., Mateos-Langerak, J., Gonzalez, C., Lelièvre, E., Lutfalla, G., Tavian, M., and Kissa, K. (2015). Primitive macrophages control HSPC mobilization and definitive haematopoiesis. *Nat. Commun.* 6, 6227.
- Trinh, L.A., and Stainier, D.Y.R. (2004). Fibronectin regulates epithelial organization during myocardial migration in zebrafish. *Dev. Cell* 6, 371–382.
- Vaidya, A., and Kale, V.P. (2015). TGF- $\beta$  signaling and its role in the regulation of hematopoietic stem cells. *Syst. Synth. Biol.* 9, 1–10.
- Valentin, G., Haas, P., and Gilmour, D. (2007). The chemokine SDF1a coordinates tissue migration through the spatially restricted activation of *Cxcr7* and *Cxcr4b*. *Curr. Biol.* 17, 1026–1031.
- Zhang, J., Ren, X., Shi, W., Wang, S., Chen, H., Zhang, B., Wang, Z., Zhou, Y., Chen, L., Zhang, R., et al. (2013). Small molecule Me6TREN mobilizes hematopoietic stem/progenitor cells by activating MMP-9 expression and disrupting SDF-1/CXCR4 axis. *Blood* 123, 428–441.



**Stem Cell Reports, Volume 8**

**Supplemental Information**

**Distinct Roles for Matrix Metalloproteinases 2 and 9 in Embryonic Hematopoietic Stem Cell Emergence, Migration, and Niche Colonization**

**Lindsay N. Theodore, Elliott J. Hagedorn, Mauricio Cortes, Kelsey Natsuhara, Sarah Y. Liu, Julie R. Perlin, Song Yang, Madeleine L. Daily, Leonard I. Zon, and Trista E. North**

## SUPPLEMENTAL FIGURE LEGENDS

### **Figure S1. Mmp2 and Mmp9 are expressed in discrete populations within hemogenic regions.**

*Related to Figure 1.*

- A) Exposure to dimethyl-Prostaglandin-E2 (PGE2) (10 $\mu$ M) and CAY10397 (CAY) (10 $\mu$ M), a small molecule that stabilizes endogenous PGE2, increased *runx1* and *cmyb* expression in the ventral dorsal aorta (VDA) by WISH, while the cyclooxygenase antagonist Indomethacin (Indo, 10 $\mu$ M) decreased expression of HSPC markers at 36 hours post fertilization (hpf).
- B) Qualitative phenotypic distribution of embryos from S1A scored with high/medium/low *runx1/cmyb* expression in the AGM (n $\geq$ 20 embryos/condition).
- C) qPCR analysis using FACS-sorted cell populations from *Tg(kdrl:dsred;cmyb:gfp)* embryos at 36 hpf showed enrichment of *mmp2* in the Flk1<sup>+</sup>cMyb<sup>-</sup> vasculature, while *mmp9* expression was present in all populations examined (1000 embryos x 2 replicate sorts). Error bars: mean  $\pm$  SD.
- D) RNA-seq analysis (~1000 pooled *Tg(mpeg1:mcherry;mpx:egfp)* embryos, >50,000 cells/fraction) indicated that *mmp9* expression is concentrated in FACS-sorted Mpx<sup>+</sup> neutrophils at 72 hpf.
- E) Metronidazole (Mtz)-mediated (24-48 hpf) targeted ablation of primitive myeloid cell types in *Tg(mpeg1:gal4;uas:nfsb-mcherry)* (macrophage) or *Tg(mpx:gal4;uas:nfsb-mcherry)* (neutrophil) embryos confirmed that neutrophil loss strongly diminished *mmp9* expression in the trunk and tail, while macrophage loss had minimal impact.
- F) Qualitative phenotypic distribution of embryos from S1E scored with high/medium/low *mmp9* expression in the trunk and tail region (n $\geq$ 25 embryos/condition).

Scale bars: 100 $\mu$ m.

### **Figure S2. The pan-gelatinase inhibitor SB-3CT is toxic during early hematopoiesis, but ARP-mediated Mmp2 inhibition has no effect on arterial identity or cell death. Related to Figure 2.**

- A) Exposure to 10 $\mu$ M SB-3CT (pan-MMP2/9 inhibitor) during HSPC formation (12-36 hpf) decreased *runx1/cmyb* expression, while 1 $\mu$ M SB-3CT had no effect by WISH analysis.
- B) Qualitative phenotypic distribution of embryos scored with high/medium/low *runx1/cmyb* expression in the AGM at 36 hpf (n $\geq$ 20 embryos/condition).
- C) High dose SB-3CT (10 $\mu$ M) treatment (as in S2A) caused major vascular defects and deformities in *Tg(kdrl:gfp)* embryos, suggestive of overall toxicity.
- D) Qualitative phenotypic distribution of embryos scored with normal/mild defect/major defect in Flk1:GFP expression (n $\geq$ 20 embryos/condition).
- E) Exposure to high dose SB-3CT (10 $\mu$ M) at a later time point (38-60 hpf), post-HSPC specification and EHT onset, diminished *cmyb* expression in the CHT and caused sustained appearance in the AGM, while low dose (1 $\mu$ M) had less prominent impact by WISH analysis.
- F) Qualitative phenotypic distribution of embryos scored with high/medium/low *cmyb* expression in the CHT at 60 hpf (n-value as in 2B).
- G) Delayed onset of treatment with SB-3CT (as in S2E) led to minor vascular defects (abnormal vascular branching) in *Tg(kdrl:gfp)* embryos, suggesting embryos better tolerate exposure at later time points.
- H) Qualitative phenotypic distribution of embryos scored with normal/mild defect/major defect in Flk1:GFP expression (n-value as in 2D).
- I) Exposure to Prinomastat (20 $\mu$ M), ARP-101 (ARP, 10 $\mu$ M), or MMP9-I (5 $\mu$ M) during HSPC formation (12-36 hpf) had no effect on *ephrinB2* expression in the AGM at 36 hpf by WISH analysis (n $\geq$ 10/condition).
- J) Exposure to ARP does not alter the appearance of Acridine Orange (AO) positive (apoptotic) cells in the AGM at 36 hpf compared to controls.
- K) Quantification of the number of AO<sup>+</sup> cells in the AGM region in control and ARP treated embryos (DMSO: 3.64  $\pm$  2.90; ARP: 3.25  $\pm$  2.59; p=0.61, 2-tailed t-test; n $\geq$ 20 embryos/condition).

Scale bars: 100 $\mu$ m.

**Figure S3. Validation of the *Tg(runx1+23<sup>(144-378)</sup>:egfp)* HSPC reporter transgenic zebrafish line and characterization of the effect of *Mmp2* inhibition on cell proliferation. Related to Figure 3.**

- A) Genomic DNA sequence corresponding to the murine +23 Runx1 enhancer (black) and the internal 144-378 base pair fragment (*Runx1+23<sup>(144-378)</sup>*, red).
- B) Schematic representation of the *Runx1+144:GFP* DNA construct used to create the *Tg(runx1+23<sup>(144-378)</sup>:eGFP)* line; a *Tg(runx1+23:egfp)* transgenic reporter genetically similar to the recently published *Tg(runx:egfp)* line (Tamplin et al., 2015) was also created using the full murine enhancer sequence.
- C) Representative fluorescence pattern *Cd41:GFP<sup>+</sup>*, *Runx1+23:GFP<sup>+</sup>* and *Runx1+144:GFP<sup>+</sup>* cells in the AGM of transgenic embryos at 36 hpf after treatment with dmpGE2 (10 $\mu$ M; 12-36 hpf) compared to DMSO controls, measured with the same length of exposure time.
- D) Representative images of *Runx1+144:GFP* expression in the CHT (*top*) and thymus (*bottom*) at 84 hpf.
- E) Exposure to ARP-101 (ARP, 10 $\mu$ M) from 12-24 hpf does not impact the appearance of proliferating cells in the AGM of *Tg(EF1:mAG-zGEM(1/100); kdrl:dsred)* embryos compared to controls at 24 hpf.
- F) Quantification of the number of *mAG-zGEM (G2/M)<sup>+</sup>* cells in the AGM of embryos from S3E (DMSO: 34.0  $\pm$  18.6; MMP9-I: 32.8  $\pm$  9.64, p=0.865, 2-tailed t-test, n $\geq$ 7 embryos/condition). Error bars: mean  $\pm$  SD.

Scale bars: 100 $\mu$ m.

**Figure S4. *Mmp2* inhibition causes an accumulation of fibronectin in the AGM. Related to Figure 4.**

- A) Exposure to SB-3CT (10 $\mu$ M, 32-48 hpf) increased fibronectin staining in the AGM compared to controls at 48 hpf (n $\geq$ 10 embryos/condition).
- B) Vibratome cross-sections show increased fibronectin staining in the posterior cardinal vein (PCV) and ventral wall of the dorsal aorta (DA) with SB-3CT treatment (32-54 hpf) compared to controls; inset

magnifications of boxed regions (from *left panels*) show gray-scale fluorescence of fibronectin (*right*;  $n \geq 7$  embryos/condition).

Scale bars: 30 (A) and 15 $\mu$ m (B).

**Figure S5. Mmp2 inhibition delays HSPC migration to the CHT without impacting circulation.**

Related to Figure 5.

- A) *mmp2* mutants display inappropriate *cmyb* expression in the AGM at 72 hpf, phenocopying the effect of ARP- and MO-mediated Mmp2 inhibition.
- B) Qualitative phenotypic distribution of total embryos from S5A (*mmp2*<sup>+/-</sup> incross) scored with normal versus abnormal *cmyb* expression in the AGM at 72 hpf ( $n \geq 20$  embryos/condition).
- C) Embryos exposed to ARP (10 $\mu$ M, 12-48 hpf) showed reduced *cmyb* expression in the CHT, concurrent with enhanced expression in the AGM at 48 hpf, suggesting HSPCs are restrained in colonization of secondary hematopoietic sites with loss of Mmp2 function.
- D) Qualitative phenotypic distribution of embryos from S5C scored with normal versus abnormal *cmyb* expression at 48 hpf ( $n \geq 20$  embryos/condition).
- E) *In vivo* imaging of *Tg(kdrl:gfp/gata1a:dsred)* embryos after exposure (12-72 hpf) to ARP, MMP9-I or Prinomastat showed no differences in Gata1<sup>+</sup> erythrocyte circulation through the Flk1<sup>+</sup> CHT vasculature compared to controls at 72 hpf ( $n \geq 10$  embryos/condition).

Scale bars: 100 $\mu$ m.

**Figure S6. Mmp9 inhibition impacts HSPC localization and number in the CHT, independent of alterations in cell proliferation.** Related to Figure 6.

- A) *In vivo* imaging of *Tg(-6.0itga2b:egfp)* embryos showed MMP9-I treatment (5 $\mu$ M, 12-72 hpf) increased the appearance of Cd41<sup>+</sup> HSPCs in the CHT region, including preferential accumulation in the anterior (*blue bar*) versus posterior (*orange bar*) half of the hematopoietic niche.

- B) Quantification of the phenotype shown in S6A via manual counts of the number of Cd41:GFP<sup>+</sup> cells per entire CHT region (DMSO: 43.5 ±1.73; MMP9-I: 64.75 ±7.93, \*p<0.05, 2-tailed t-test, n≥4 embryos/condition). Error bars: mean ± SD.
- C) FACS for Cd41:GFP<sup>+</sup>,Gata1:dsRed<sup>-</sup> cells (with negative thrombocyte selection) showed no difference in whole embryo HSPC numbers at 72 hpf with MMP9-I exposure (12-72 hpf) compared to control (DMSO: 0.83 ±0.077; MMP9-I: 0.781 ±0.028, p=0.328, 2-tailed t-test, n≥5 embryos/sample, >3 replicates/condition). Error bars: mean ± SD.
- D) Quantification of the localization phenotype observed in S6A via manual count Cd41:GFP<sup>+</sup> HSPCs in each half of the CHT at 72 hpf revealed an increase in the anterior: posterior cell number ratio with Mmp9 (12-72 hpf) inhibition (DMSO: 0.62 ±0.132; MMP9-I: 1.16 ±0.317, \*p<0.05, 2-tailed t-test, n-value as in S6B). Error bars: mean ± SD.
- E) EdU labeling in *Tg(runx1+23<sup>(144-235)</sup>:egfp)* embryos showed no change in the level of double positive EdU/Runx1+144 staining in the CHT after MMP9-I treatment (24-72 hpf).
- F) Qualitative phenotypic distribution of total embryos from S6E scored with high, medium, or low EdU staining level at 72 hpf (n≥20 embryos/condition).
- G) pH3 staining in *Tg(runx1+23<sup>(144-235)</sup>:egfp)* embryos showed no alteration in the number of double positive pH3/Runx1+144 cells in the CHT after MMP9-I treatment (24-72 hpf).
- H) Quantification of the phenotype in S6G via manual counts of the number of pH3<sup>+</sup>/Runx1+144:GFP<sup>+</sup> HSPCs per CHT in control and MMP9-I treated embryos (DMSO: 2.58 ±1.42; MMP9-I: 1.91 ±1.56; p=0.13, 2-tailed t-test; n≥20 embryos/condition). Error bars: mean ± SD.

Scale bars: 100µm.

**Figure S7. Mmp9 inhibition does not impact HSPC localization in *cxcl12a* heterozygous mutants.**

Related to Figure 7.

- A) Exposure of wild-type (WT) sibling controls to MMP9-I (5µM, 12-72 hpf) increased *cmyb* expression in the CHT at 72 hpf; in contrast, while heterozygous loss of *cxcl12a* in *cxcl12a<sup>t30516/t30516</sup>* (*cxcl12a<sup>+/-</sup>*)

embryos had no impact on *cmyb* expression alone, it antagonized the effect of Mmp9 inhibition (n $\geq$ 20/condition).

- B) Qualitative phenotypic distribution of control and MMP9-I treated WT and *cxcl12a*<sup>+/-</sup> siblings from S7A scored with high/medium/low *cmyb* expression at 72 hpf (n $\geq$ 20/condition).

Scale bars: 100 $\mu$ m.

Supplemental Figure 1

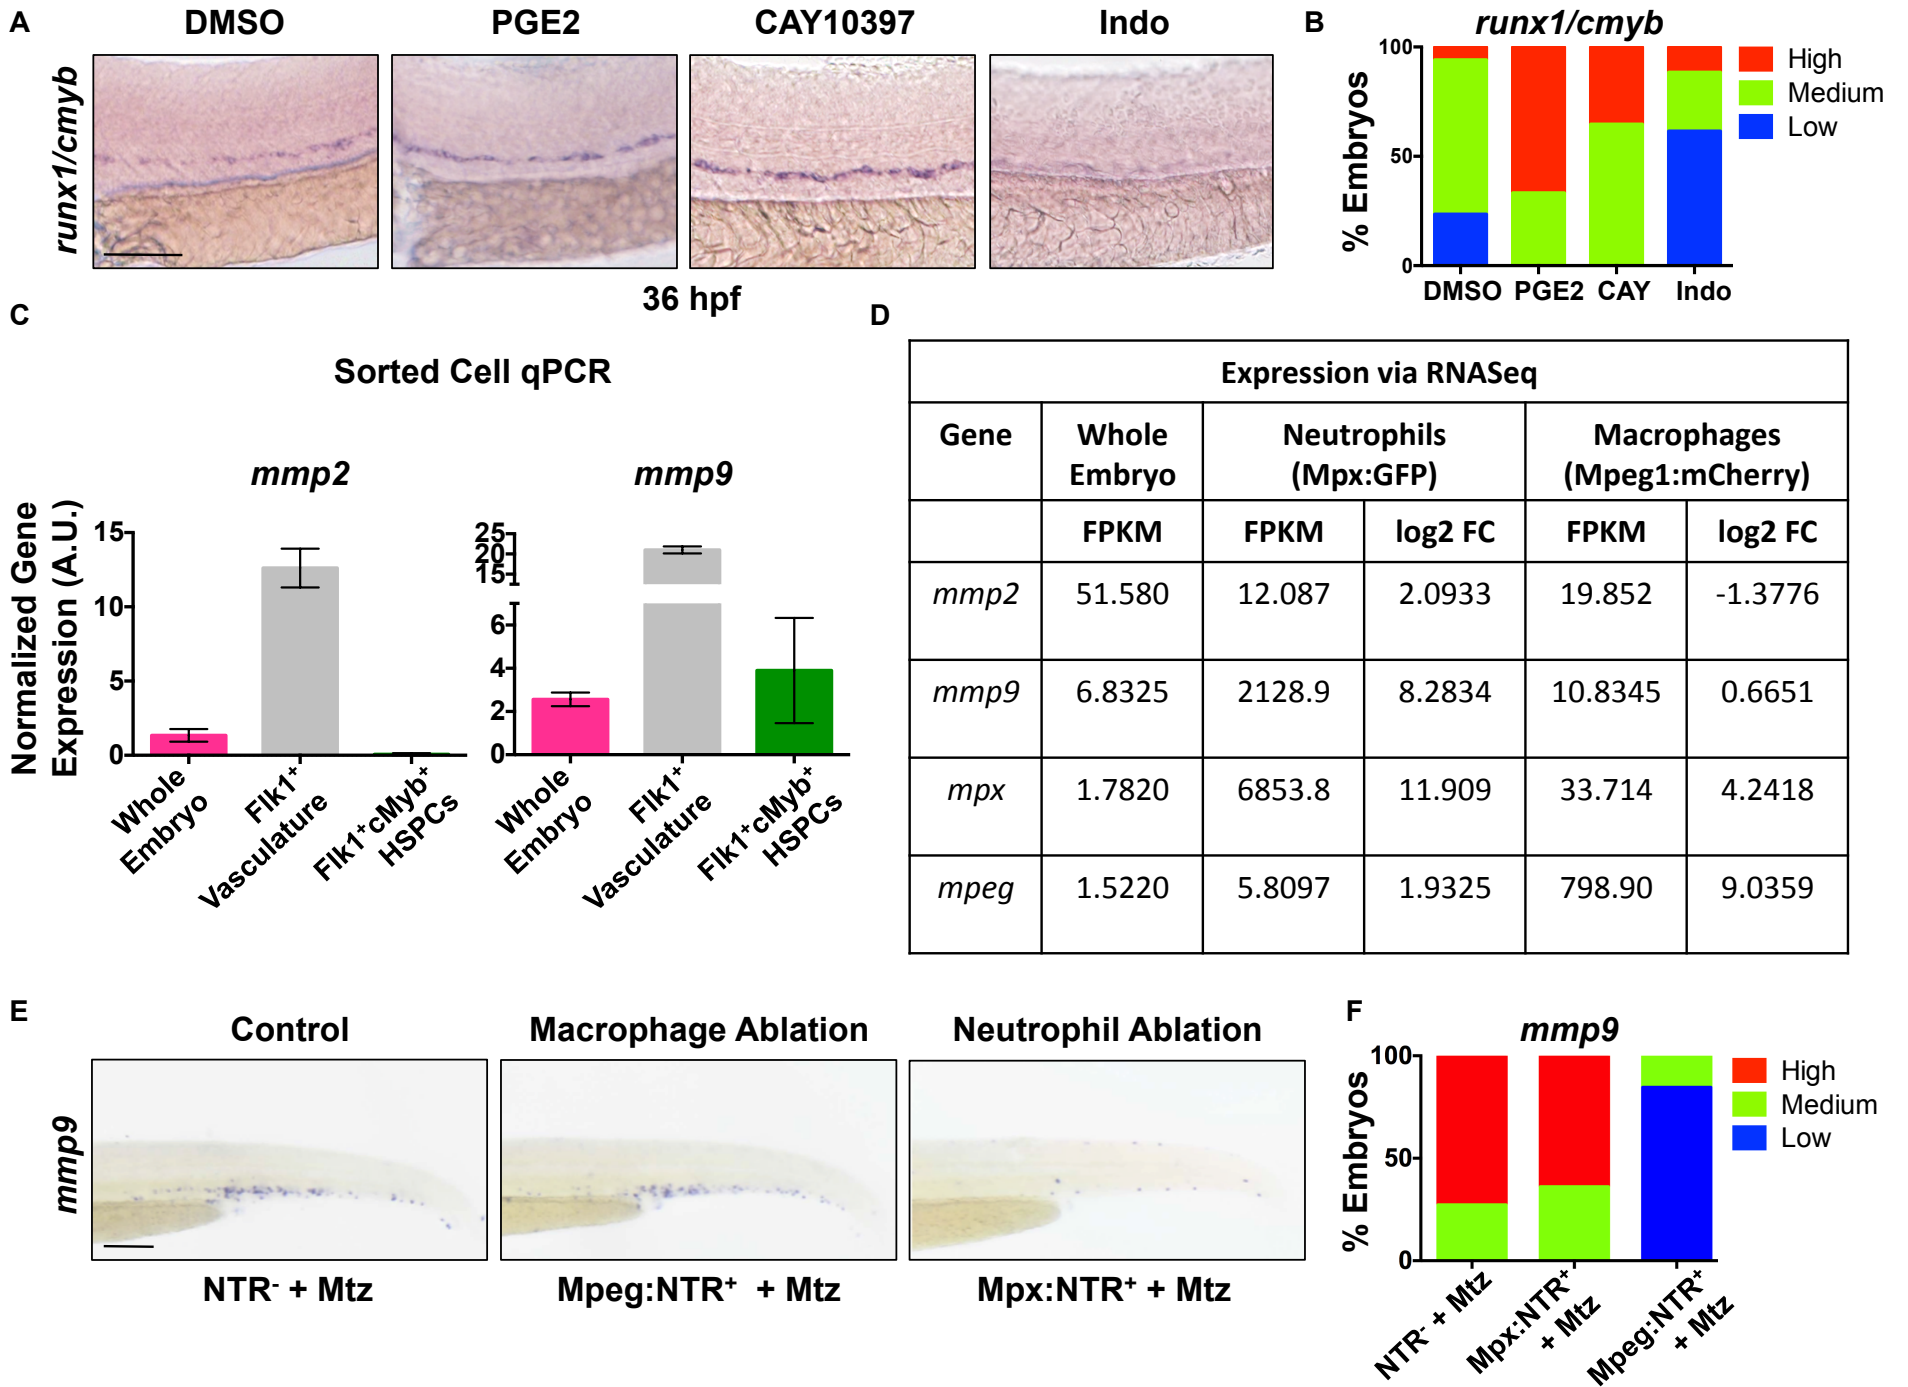



Supplemental Figure 2

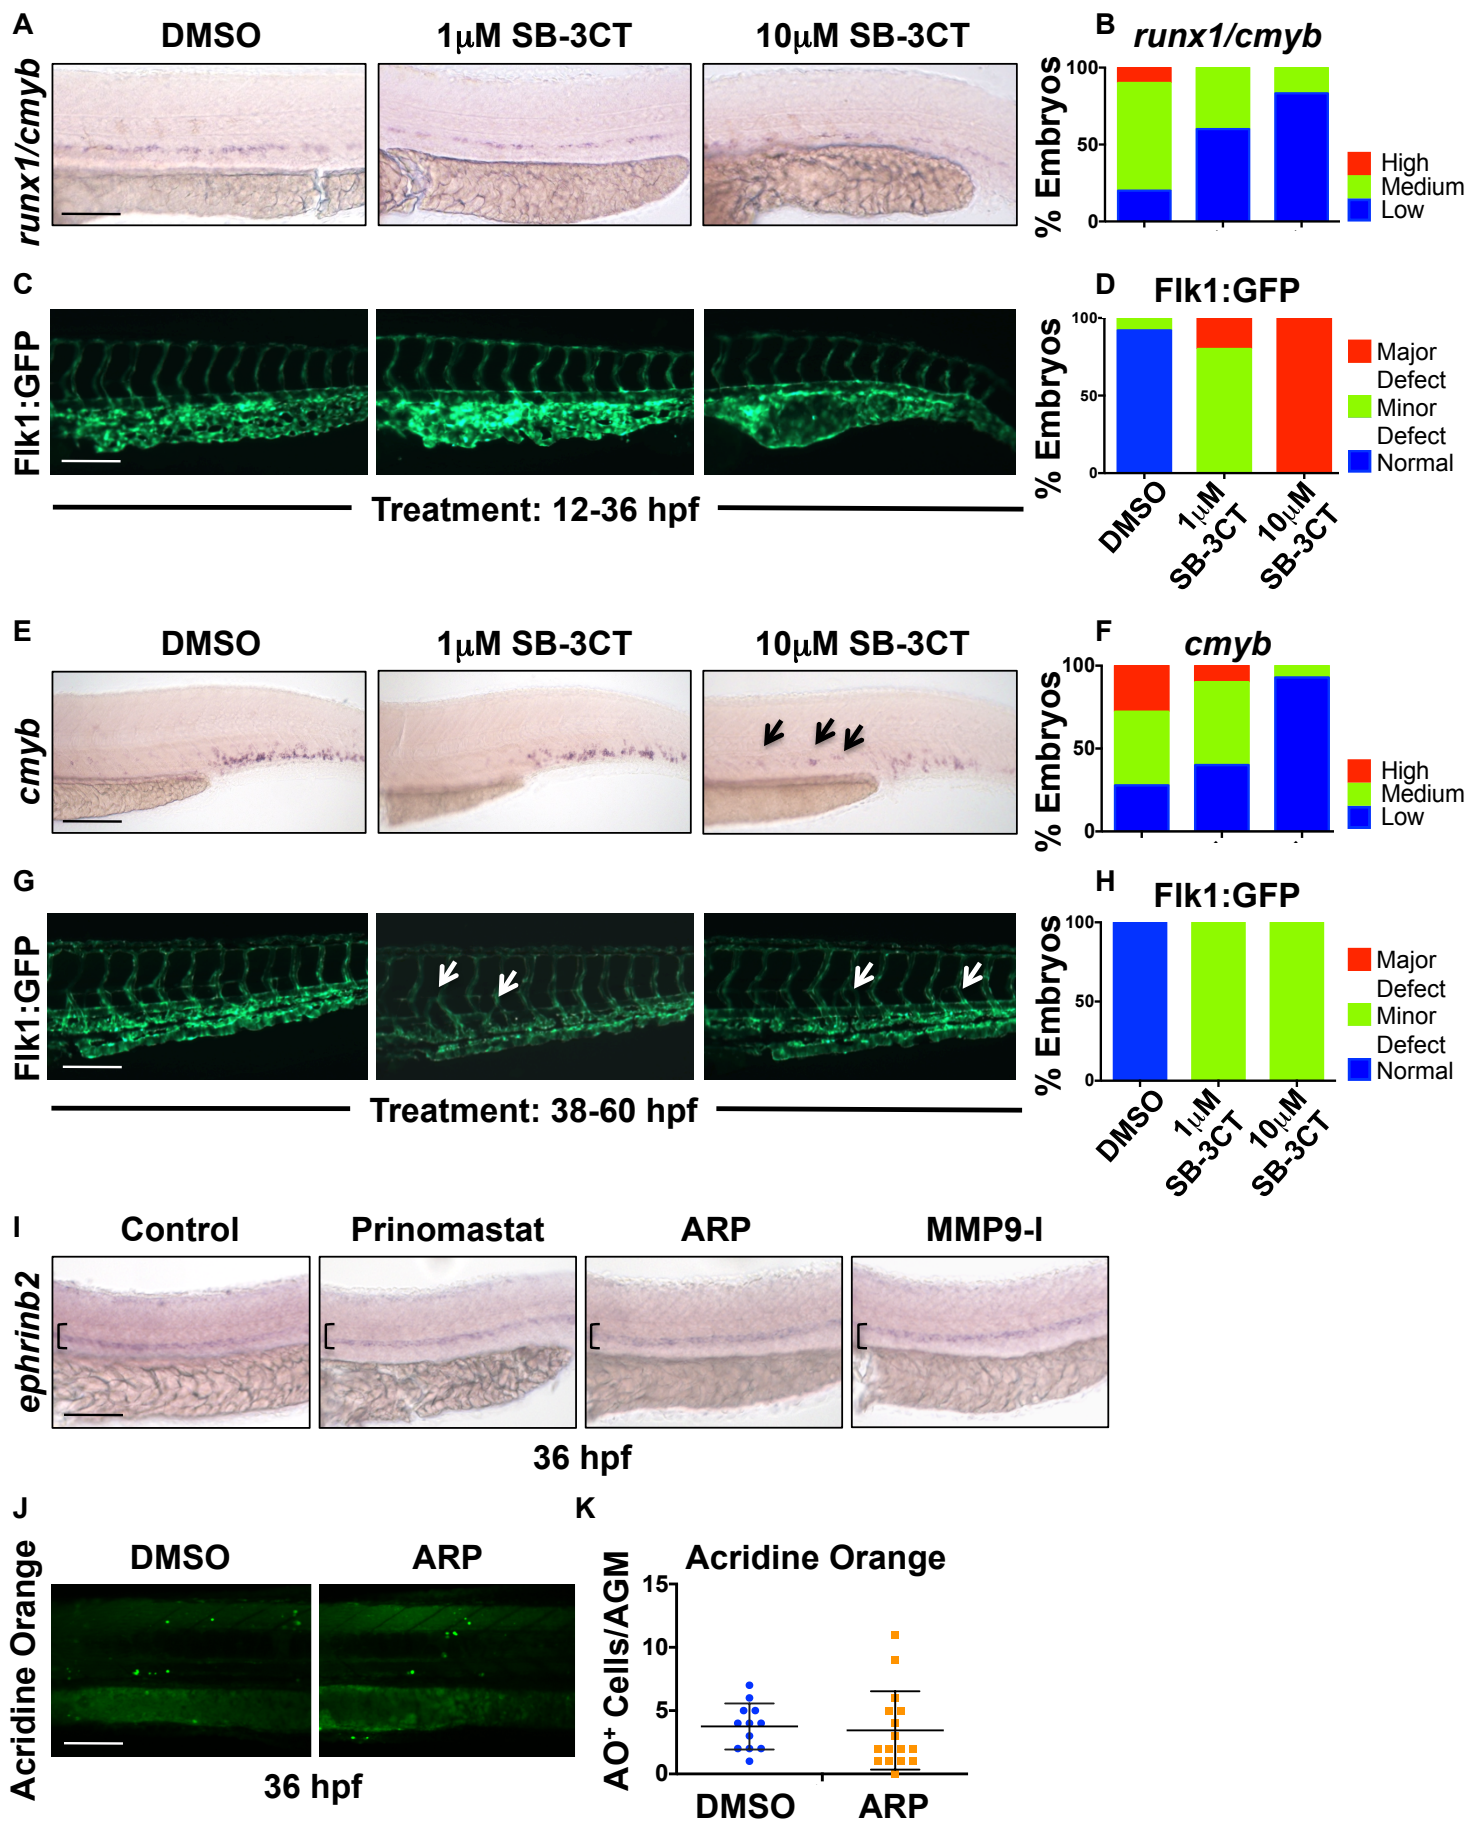

### Supplemental Figure 3

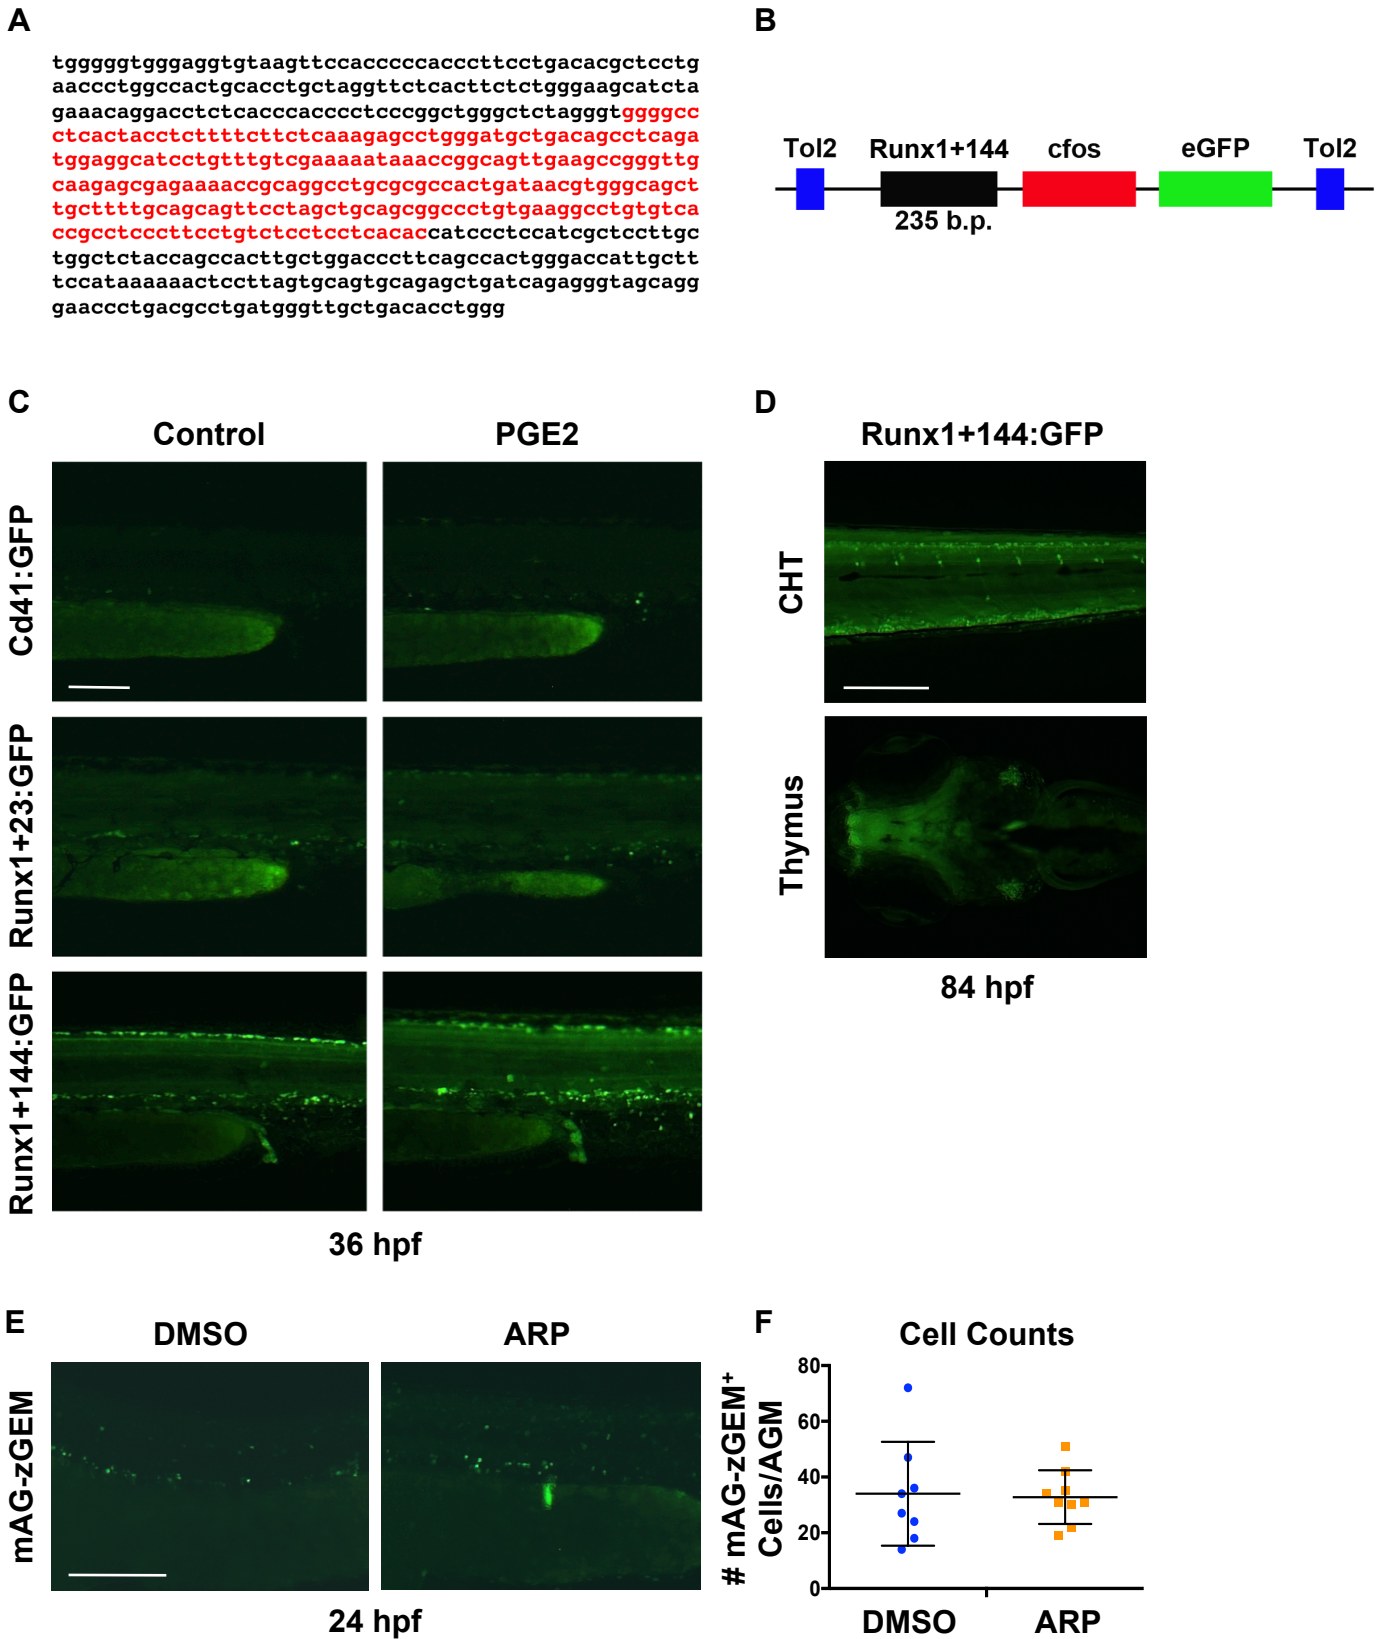

Supplemental Figure 4

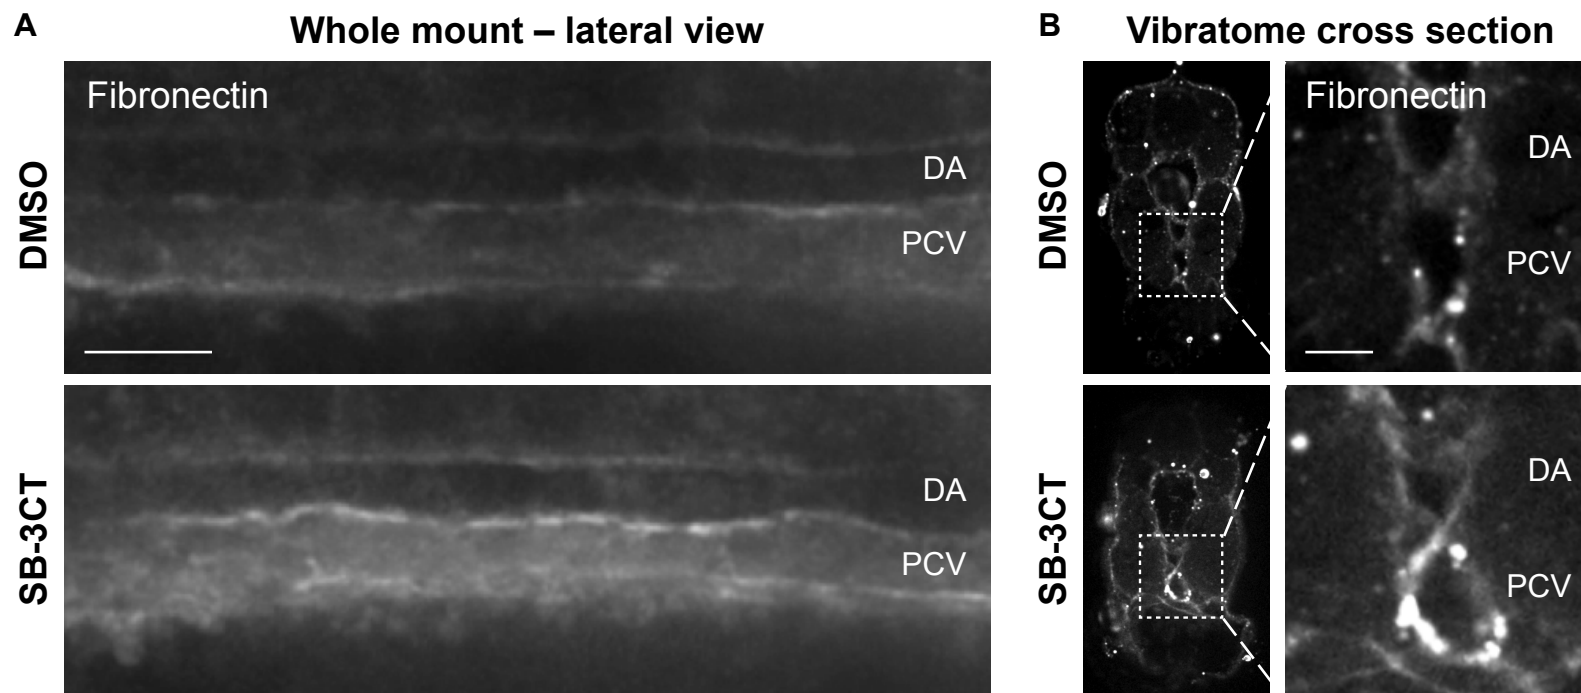

Supplemental Figure 5

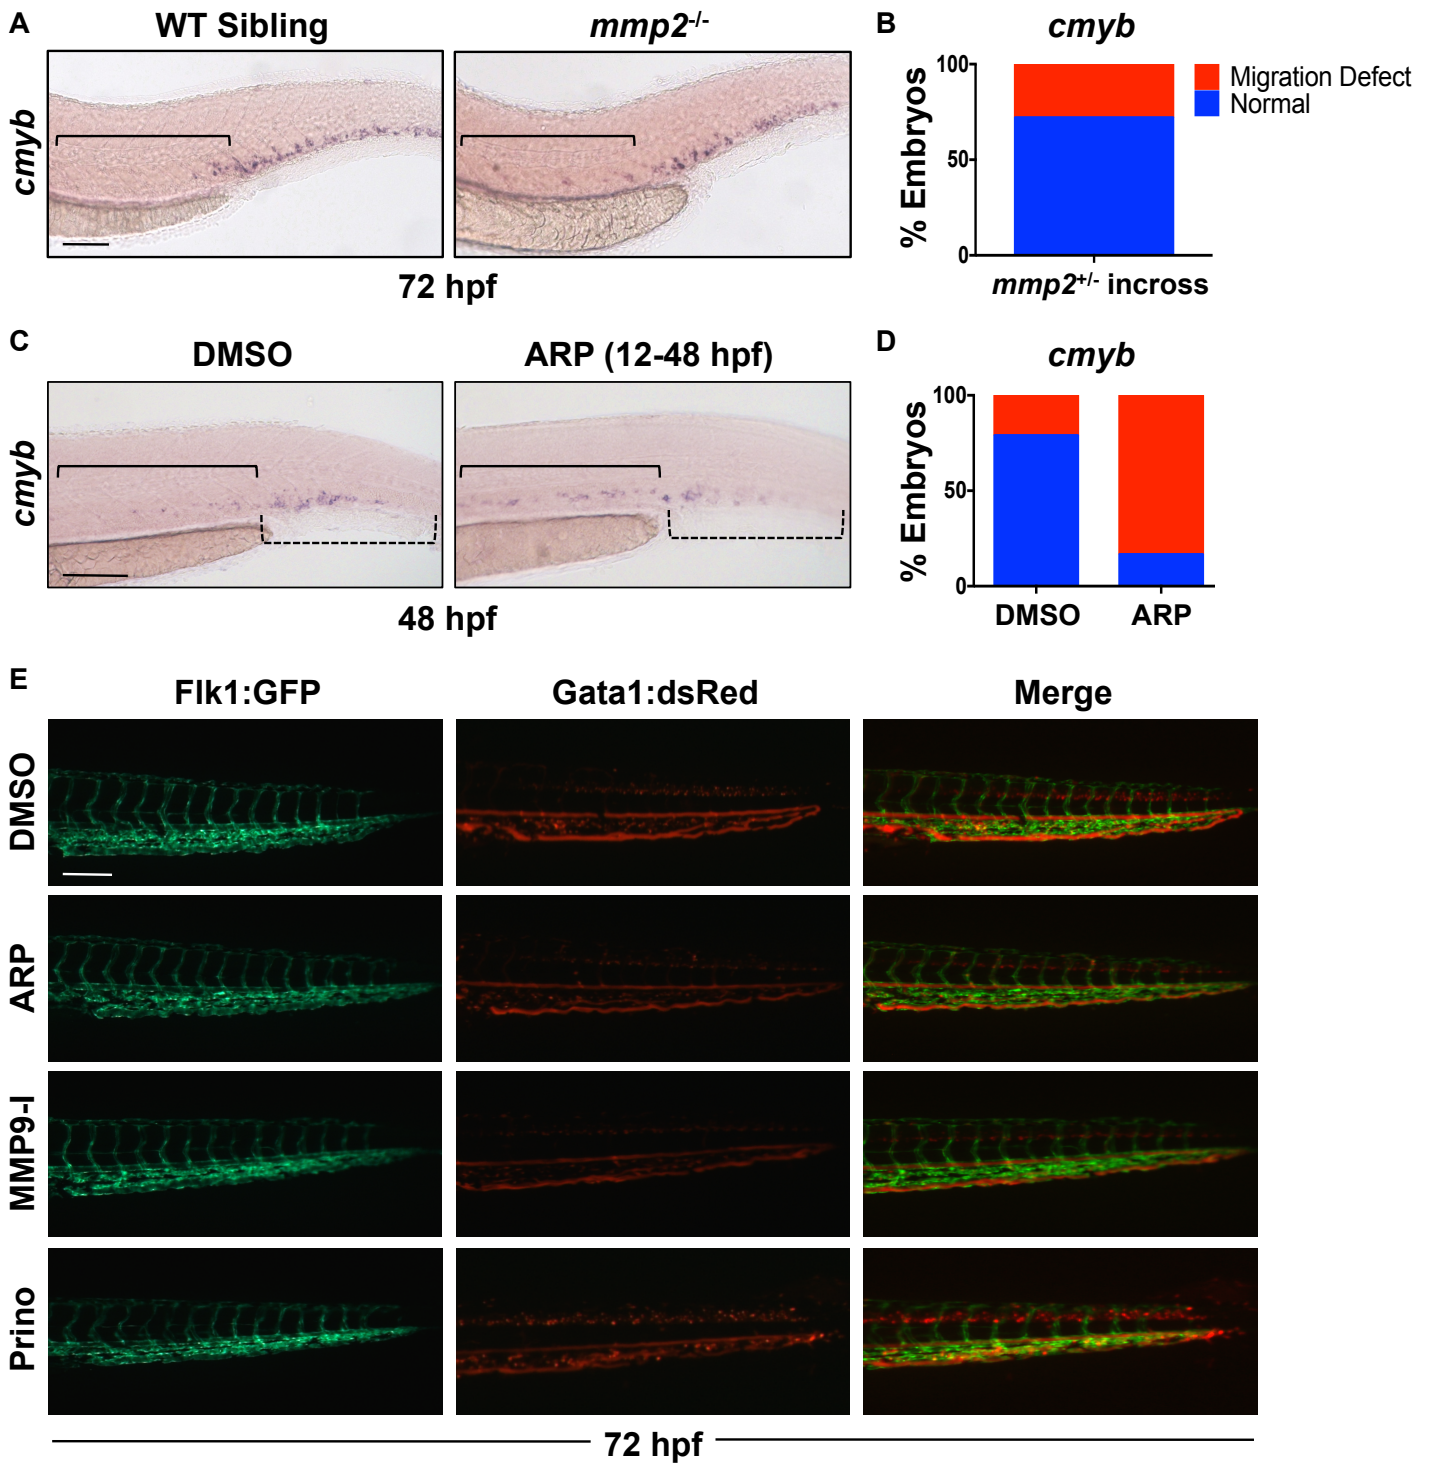

Supplemental Figure 6

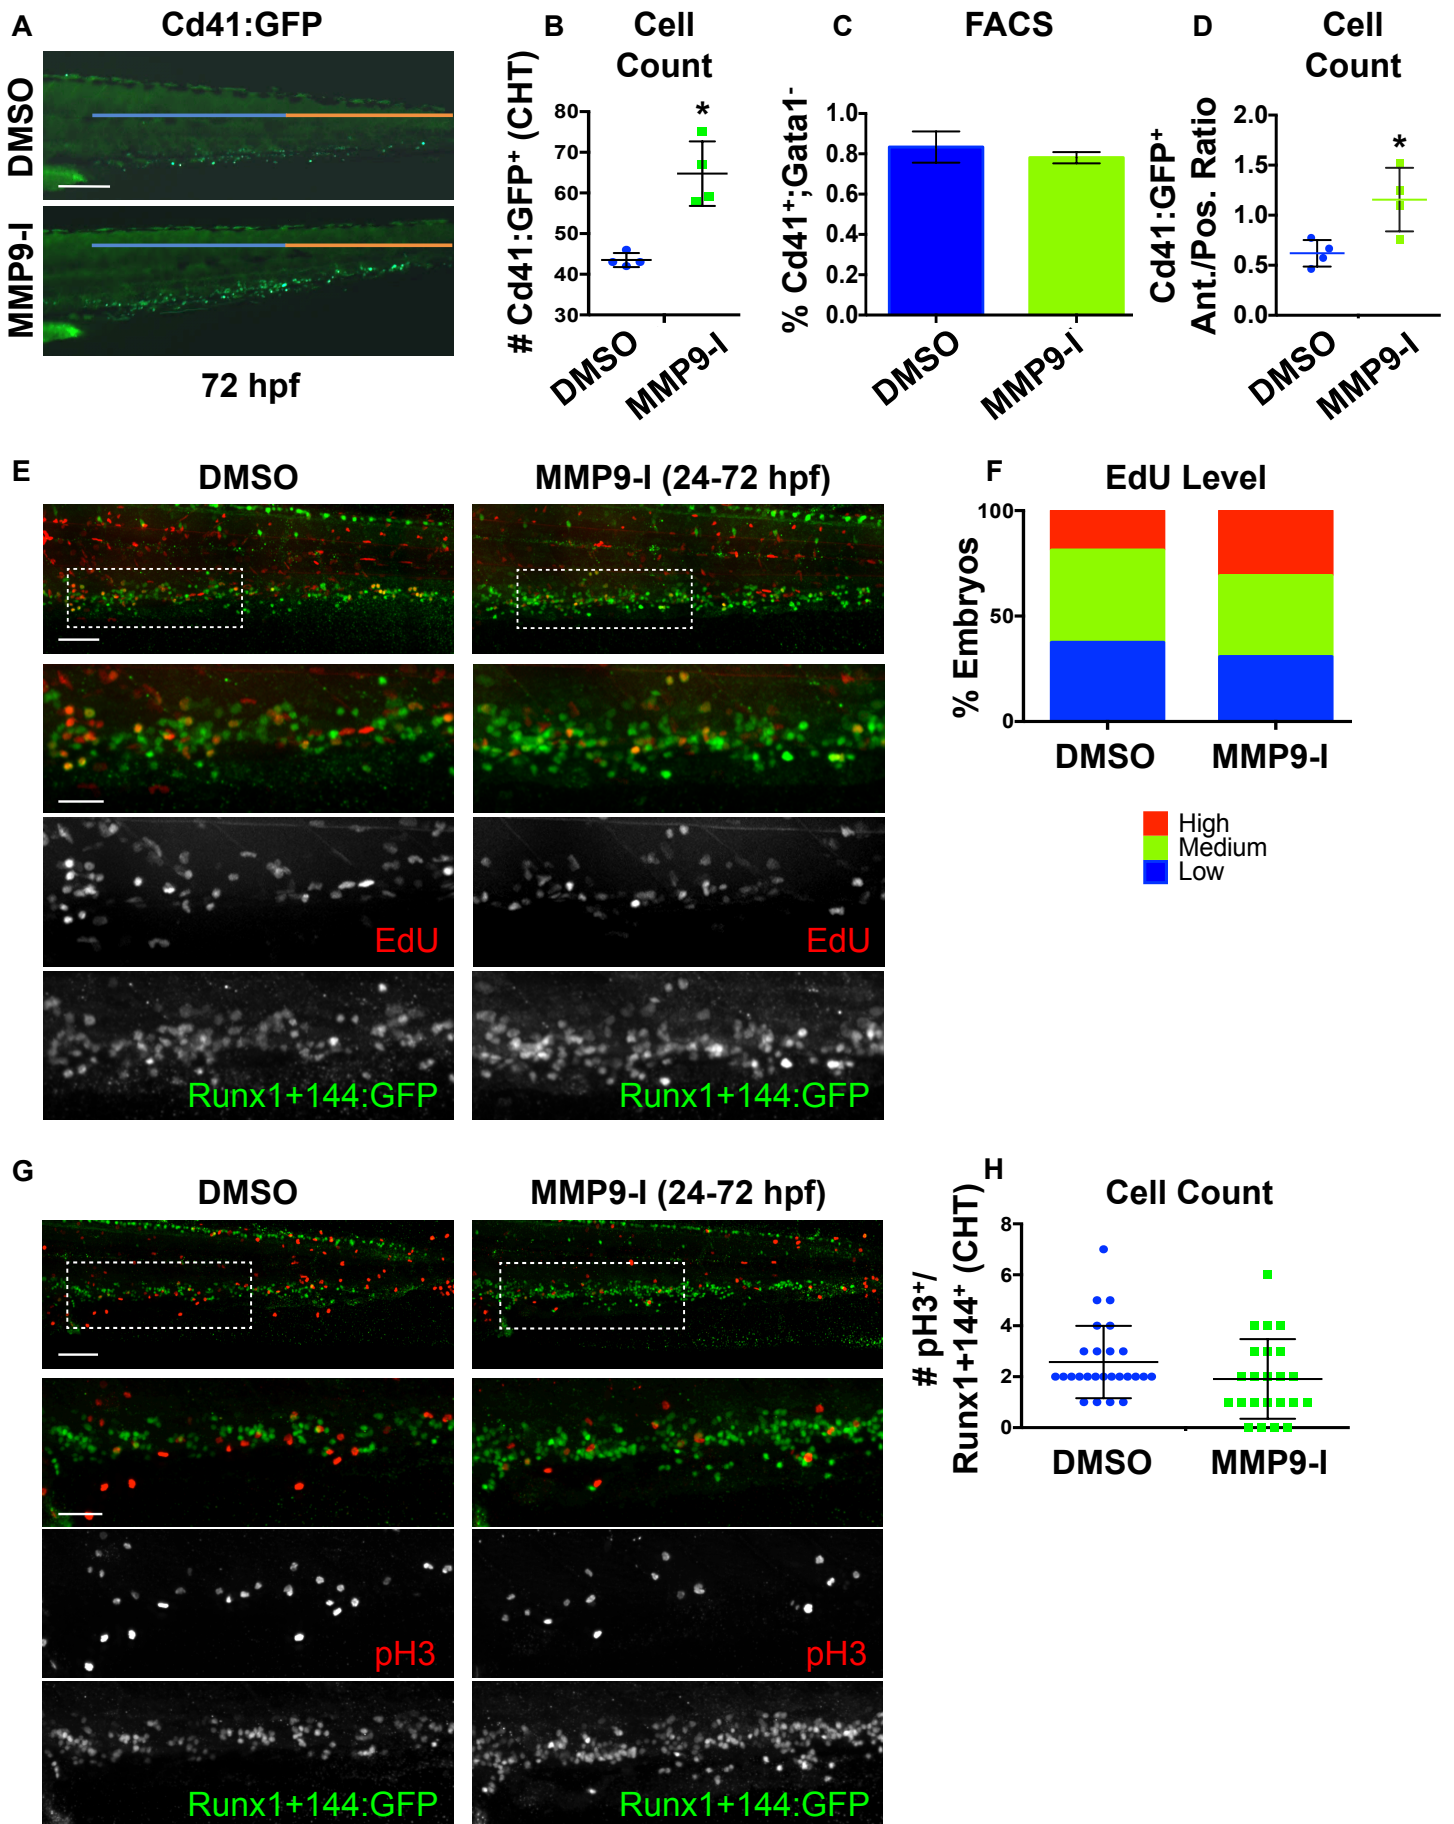

Supplemental Figure 7

A

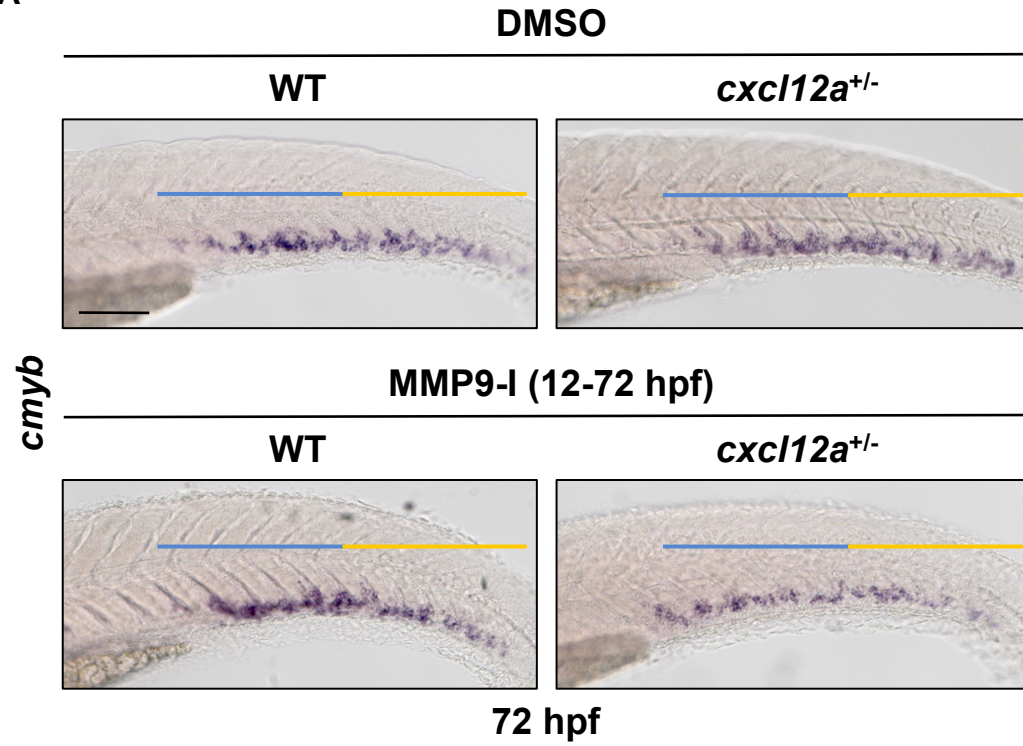

B

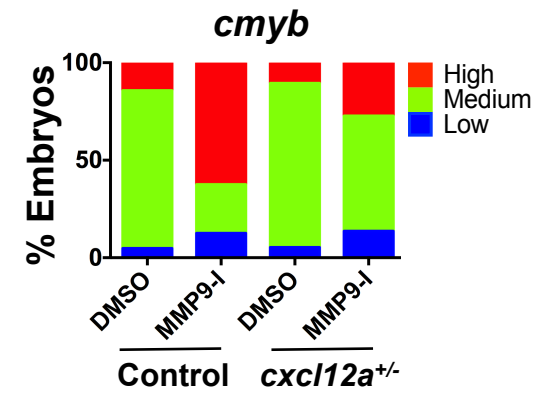

## SUPPLEMENTAL EXPERIMENTAL PROCEDURES

### *Transgenic and Mutant Zebrafish Lines* (related to Zebrafish Husbandry)

| Official Line Name                          | Common Name                           | Reference                                                        |
|---------------------------------------------|---------------------------------------|------------------------------------------------------------------|
| <i>Tg(-6.0itga2b:egfp)</i>                  | Cd41:GFP                              | (Bertrand et al., 2008)                                          |
| <i>Tg(kdrl:gfp)</i>                         | Flk1:GFP                              | (Choi et al., 2007)                                              |
| <i>Tg(kdrl:dsred2)</i>                      | Flk1:dsRed                            | (Kikuchi et al., 2011)                                           |
| <i>Tg(cmyb:egfp)</i>                        | cMyb:GFP                              | (North et al., 2007)                                             |
| <i>Tg(gata1a:dsRed)</i>                     | Gata1:dsRed                           | (Traver et al., 2003)                                            |
| <i>Tg(runx+23<sup>(144-378)</sup>:egfp)</i> | Runx1+144:GFP                         | <i>see description below</i>                                     |
| <i>Tg(runx1P2:egfp)</i>                     | Runx1:GFP                             | (Lam et al., 2010)                                               |
| <i>fn1a<sup>tl43c/tl43c</sup></i>           | <i>natter</i> , fibronectin mutant    | (Trinh and Stainier, 2004)                                       |
| <i>Tg(hsp70l:cxcl12b-egfp)</i>              | Hsp70:Cxcl12b                         | (Li et al., 2005)                                                |
| <i>cxcl12a<sup>t30516/t30516</sup></i>      | <i>medusa</i> , <i>cxcl12a</i> mutant | (Valentin et al., 2007)                                          |
| <i>mmp2<sup>hu10535</sup></i>               | <i>mmp2</i> mutant                    | (Kok et al., 2015)                                               |
| <i>Tg(mpeg1:gal4;uas:nfsb-mcherry)</i>      | Mpeg1:NTR                             | (Davison et al., 2007; Ellett et al., 2011)                      |
| <i>Tg(mpx:gal4;uas:nfsb-mcherry)</i>        | Mpx:NTR                               | (Davison et al., 2007; Robertson et al., 2014)                   |
| <i>Tg(EF1:mAG-zGem(1/100))rw0410h)</i>      | mAG-zGEM                              | (Sugiyama et al., 2009)                                          |
| <i>Tg(runx1+23:egfp)</i>                    | Runx1+23:GFP                          | <i>see description below [similar to (Tamplin et al., 2015)]</i> |
| <i>Tg(mpeg1:mcherry)</i>                    | Mpeg1:mCherry                         | (Ellett et al., 2011)                                            |
| <i>Tg(mpx:egfp)</i>                         | Mpx:GFP                               | (Renshaw et al., 2006)                                           |
| <i>Tg(rag2:dsred)zf411</i>                  | Rag2:dsRed                            | (Ma et al., 2012)                                                |

### *Morpholino Sequences* (related to Morpholino Injections)

| <b>Gene</b>    | <b>Morpholino</b>                   | <b>Reference</b>         |
|----------------|-------------------------------------|--------------------------|
| <i>mmp2</i>    | 5' - GTGGCGAACAGCCCTTTCAGACGTG - 3' | (Coyle et al., 2008)     |
| <i>mmp9</i>    | 5'-CGCCAGGACTCCAAGTCTCATTTTG- 3'    | (Volkman et al., 2010)   |
| <i>excl12a</i> | 5'-CTACTACGATCACTTTGAGATCCAT-3'     | (Doitsidou et al., 2002) |

### *qPCR Primers* (related to RNA Extraction and qRT-PCR)

| <b>Gene</b> | <b>Forward</b>        | <b>Reverse</b>       | <b>Reference</b>     |
|-------------|-----------------------|----------------------|----------------------|
| <i>mmp2</i> | GCTGTTCCCGATGACCTAGA  | GCTGTCATTTCTGGCCATTT |                      |
| <i>mmp9</i> | TTGCCTTTTCCTCTCTGCAT  | TCATGATCTCTGCGAAGTGG | (Esain et al., 2015) |
| <i>18s</i>  | TCGCTAGTTGGCATCGTTTAT | CGGAGGTTCGAAGACGATCA | (Esain et al., 2015) |

### *Small Molecules*

| <b>Drug</b>  | <b>Target</b>      | <b>Dose</b>   | <b>Supplier</b> | <b>Reference</b>           |
|--------------|--------------------|---------------|-----------------|----------------------------|
| ARP-101      | MMP2               | 10 $\mu$ M    | Tocris          |                            |
| MMP9-I       | MMP9               | 5 $\mu$ M     | Merck Millipore |                            |
| Prinomastat  | MMP2/MMP9          | 20 $\mu$ M    | Sigma-Aldrich   |                            |
| SB-3CT       | MMP2/MMP9          | 1, 10 $\mu$ M | Sigma-Aldrich   | (Travnickova et al., 2015) |
| dmPGE2       |                    | 10 $\mu$ M    | Cayman Chemical | (North et al., 2007)       |
| Indomethacin | Cyclooxygenase 1/2 | 10 $\mu$ M    | Sigma-Aldrich   | (North et al., 2007)       |
| CAY10397     | PGDH               | 10 $\mu$ M    | Cayman Chemical | (Nissim et al., 2014)      |

### *Antibodies*

| <b>Antibody</b>                               | <b>Species</b> | <b>Source</b>                    | <b>Catalog Number</b> |
|-----------------------------------------------|----------------|----------------------------------|-----------------------|
| Fibronectin                                   | Rabbit         | Sigma-Aldrich                    | F3648                 |
| Anti-phospho-Histone H3 (pSer <sup>10</sup> ) | Rabbit         | EMD Millipore                    | 06-570                |
| GFP                                           | Rabbit         | Millipore (Sigma-Aldrich)        | AB3080                |
| GFP                                           | Chicken        | GeneTex                          | GTX13970              |
| Anti-rabbit IgG, Alexa Fluor 488              | Goat           | Molecular Probes (Thermo Fisher) | A-11034               |



|                                   |      |                                  |         |
|-----------------------------------|------|----------------------------------|---------|
| Anti-rabbit IgG, Alexa Fluor 568  | Goat | Molecular Probes (Thermo Fisher) | A-11011 |
| Anti-chicken IgG, Alexa Fluor 488 | Goat | Molecular Probes (Thermo Fisher) | A-11039 |

***Generation of the  $Tg(runx1+23(144-378):egfp)$  HSPC reporter transgenic zebrafish line***

A 235 base pair fragment corresponding to region 144-378 of +23 Runx1 murine enhancer (Nottingham, et al. 2007), as well as the full enhancer region, were amplified from mouse genomic DNA with the following primers: Runx1+144Fwd-5'-GGGGCCCTCACTACCTCTTTTCTTCTC-3' and Runx1+144Rev-5'-GTGTGAGGAGGAGACAGGAAGAAGGGAGGC-3' or Runx1+23Fwd-5' - GGGGGTGGGAGGTGTAAGTTC-3' and Runx1+23Rev-5' -CCAGGTGTCAGCAACCCATC-3', and cloned into pT2-cfos-EGFP (Fisher et al., 2006).  $Tg(runx1+23:egfp)$  and  $Tg(runx1+23^{(144-378)}:egfp)$  transgenic fish were generated by co-injection of the Tol2-transposase mRNA (Kwan et al., 2007) into 1-cell stage embryos and transgenic F<sub>0</sub> founders were identified by eGFP expression in the AGM.

**SUPPLEMENTAL REFERENCES**

Bertrand, J.Y., Kim, A.D., Teng, S., and Traver, D. (2008). CD41+ cmyb+ precursors colonize the zebrafish pronephros by a novel migration route to initiate adult hematopoiesis. *Development* 135, 1853–1862.

Choi, J., Dong, L., Ahn, J., Dao, D., Hammerschmidt, M., and Chen, J.-N. (2007). FoxH1 negatively modulates flk1 gene expression and vascular formation in zebrafish. *Developmental Biology* 304, 735–744.

Coyle, R.C., Latimer, A., and Jessen, J.R. (2008). Membrane-type 1 matrix metalloproteinase regulates cell migration during zebrafish gastrulation: Evidence for an interaction with non-canonical Wnt signaling. *Experimental Cell Research* 314, 2150–2162.

Davison, J.M., Akitake, C.M., Goll, M.G., Rhee, J.M., Gosse, N., Baier, H., Halpern, M.E., Leach, S.D.,

and Parsons, M.J. (2007). Transactivation from Gal4-VP16 transgenic insertions for tissue-specific cell labeling and ablation in zebrafish. *Developmental Biology* 304, 811–824.

Doitsidou, M., Reichman-Fried, M., Stebler, J., Köprunner, M., Dörries, J., Meyer, D., Esguerra, C.V., Leung, T., and Raz, E. (2002). Guidance of primordial germ cell migration by the chemokine SDF-1. *Cell* 111, 647–659.

Ellett, F., Pase, L., Hayman, J.W., Andrianopoulos, A., and Lieschke, G.J. (2011). mpeg1 promoter transgenes direct macrophage-lineage expression in zebrafish. *Blood* 117, e49–e56.

Esain, V., Kwan, W., Carroll, K.J., Cortes, M., Liu, S.Y., Frechette, G.M., Sheward, L.M.V., Nissim, S., Goessling, W., and North, T.E. (2015). Cannabinoid Receptor-2 Regulates Embryonic Hematopoietic Stem Cell Development via Prostaglandin E2 and P-Selectin Activity. *Stem Cells* 33, 2596–2612.

Fisher, S., Grice, E.A., Vinton, R.M., Bessling, S.L., Urasaki, A., Kawakami, K., and McCallion, A.S. (2006). Evaluating the biological relevance of putative enhancers using Tol2 transposon-mediated transgenesis in zebrafish. *Nat Protoc* 1, 1297–1305.

Goessling, W., North, T.E., Loewer, S., Lord, A.M., Lee, S., Stoick-Cooper, C.L., Weidinger, G., Puder, M., Daley, G.Q., Moon, R.T., et al. (2009). Genetic Interaction of PGE2 and Wnt Signaling Regulates Developmental Specification of Stem Cells and Regeneration. *Cell* 136, 1136–1147.

Kikuchi, K., Holdway, J.E., Major, R.J., Blum, N., Dahn, R.D., Begemann, G., and Poss, K.D. (2011). Retinoic Acid Production by Endocardium and Epicardium Is an Injury Response Essential for Zebrafish Heart Regeneration. *Developmental Cell* 20, 397–404.

Kok, F.O., Shin, M., Ni, C.-W., Gupta, A., Grosse, A.S., van Impel, A., Kirchmaier, B.C., Peterson-Maduro, J., Kourkoulis, G., Male, I., et al. (2015). Reverse Genetic Screening Reveals Poor Correlation between Morpholino-Induced and Mutant Phenotypes in Zebrafish. *Developmental Cell* 32, 97–108.

Kwan, K.M., Fujimoto, E., Grabher, C., Mangum, B.D., Hardy, M.E., Campbell, D.S., Parant, J.M., Yost, H.J., Kanki, J.P., and Chien, C.-B. (2007). The Tol2kit: A multisite gateway-based construction kit for Tol2 transposon transgenesis constructs. *Developmental Dynamics* 236, 3088–3099.

Lam, E.Y.N., Hall, C.J., Crosier, P.S., Crosier, K.E., and Flores, M.V. (2010). Live imaging of Runx1 expression in the dorsal aorta tracks the emergence of blood progenitors from endothelial cells. *Blood* 116, 909–914.

Li, Q., Shirabe, K., Thisse, C., Thisse, B., Okamoto, H., Masai, I., and Kuwada, J.Y. (2005). Chemokine signaling guides axons within the retina in zebrafish. *J. Neurosci.* 25, 1711–1717.

Ma, D., Wang, L., Wang, S., Gao, Y., Wei, Y., and Liu, F. (2012). Foxn1 maintains thymic epithelial cells to support T-cell development via mcm2 in zebrafish. *Proc. Natl. Acad. Sci. U.S.a.* 109, 21040–21045.

Nissim, S., Sherwood, R.I., Wucherpfennig, J., Saunders, D., Harris, J.M., Esain, V., Carroll, K.J., Frechette, G.M., Kim, A.J., Hwang, K.L., et al. (2014). Prostaglandin E2 Regulates Liver versus Pancreas Cell-Fate Decisions and Endodermal Outgrowth. *Developmental Cell* 28, 423–437.

North, T.E., Goessling, W., Walkley, C.R., Lengerke, C., Kopani, K.R., Lord, A.M., Weber, G.J., Bowman, T.V., Jang, I.-H., Grosser, T., et al. (2007). Prostaglandin E2 regulates vertebrate haematopoietic stem cell homeostasis. *Nature* 447, 1007–1011.

Nottingham, W.T., Jarratt, A., Burgess, M., Speck, C.L., Cheng, J.-F., Prabhakar, S., Rubin, E.M., Li, P.-S., Sloane-Stanley, J., Kong-A-San, J., et al. (2007). Runx1-mediated hematopoietic stem-cell emergence is controlled by a Gata/Ets/SCL-regulated enhancer. *Blood* 110, 4188–4197.

Renshaw, S.A., Loynes, C.A., Trushell, D.M.I., Elworthy, S., Ingham, P.W., and Whyte, M.K.B. (2006). A transgenic zebrafish model of neutrophilic inflammation. *Blood* 108, 3976–3978.

Robertson, A.L., Holmes, G.R., Bojarczuk, A.N., Burgon, J., Loynes, C.A., Chimen, M., Sawtell, A.K., Hamza, B., Willson, J., Walmsley, S.R., et al. (2014). A zebrafish compound screen reveals modulation of neutrophil reverse migration as an anti-inflammatory mechanism. *Sci Transl Med* 6, 225ra29–225ra29.

Sugiyama, M., Sakaue-Sawano, A., Iimura, T., Fukami, K., Kitaguchi, T., Kawakami, K., Okamoto, H., Higashijima, S.-I., and Miyawaki, A. (2009). Illuminating cell-cycle progression in the developing zebrafish embryo. *Proc. Natl. Acad. Sci. U.S.A.* 106, 20812–20817.

Tamplin, O.J., Durand, E.M., Carr, L.A., Childs, S.J., Hagedorn, E.J., Li, P., Yzaguirre, A.D., Speck, N.A., and Zon, L.I. (2015). Hematopoietic Stem Cell Arrival Triggers Dynamic Remodeling of the Perivascular Niche. *Cell* 160, 241–252.

Traver, D., Paw, B.H., Poss, K.D., Penberthy, W.T., Lin, S., and Zon, L.I. (2003). Transplantation and in vivo imaging of multilineage engraftment in zebrafish bloodless mutants. *Nat Immunol* 4, 1238–1246.

Travnickova, J., Tran Chau, V., Julien, E., Mateos-Langerak, J., Gonzalez, C., Lelièvre, E., Lutfalla, G., Tavian, M., and Kissa, K. (2015). Primitive macrophages control HSPC mobilization and definitive haematopoiesis. *Nat Commun* 6, 6227.

Trinh, L.A., and Stainier, D.Y.R. (2004). Fibronectin Regulates Epithelial Organization during Myocardial Migration in Zebrafish. *Developmental Cell* 6, 371–382.

Valentin, G., Haas, P., and Gilmour, D. (2007). The Chemokine SDF1a Coordinates Tissue Migration through the Spatially Restricted Activation of Cxcr7 and Cxcr4b. *Current Biology* 17, 1026–1031.

Volkman, H.E., Pozos, T.C., Zheng, J., Davis, J.M., Rawls, J.F., and Ramakrishnan, L. (2010). Tuberculous Granuloma Induction via Interaction of a Bacterial Secreted Protein with Host Epithelium. *Science* 327, 466–469.
